# Supplementary material for: Phylogenetic and Phylogeographic Analysis of the Highly Pathogenic H5N6 Avian Influenza Virus in China
Source: MDPI journal article supplement (doi:10.3390/v14081752), 2022-08-11
Supplement: s1 [file s1]

**Table S4. Statistically supported migration rates of the clade 2.3.4.4b and 2.3.4.4h H5N6 AIVs.**

| Segment     | From      | To        | Bayes_factor <sup>a</sup> | Transition rate <sup>b</sup>         | Posterior probability | Inter-province distance (km) <sup>c</sup> |
|-------------|-----------|-----------|---------------------------|--------------------------------------|-----------------------|-------------------------------------------|
| 2.3.4.4b HA | Hong Kong | Guangxi   | 33.77947067               | 0.969<br>95% HPD [2.6082E-4, 2.9137] | 0.784357294           | 604                                       |
|             | Guangdong | Zhejiang  | 29.39510454               | 1.015<br>95% HPD [6.9506E-4, 3.0282] | 0.759915565           | 1048                                      |
|             | Guangdong | Yunnan    | 23.26441874               | 0.98<br>95% HPD [3.5402E-5, 2.942]   | 0.714698367           | 1092                                      |
|             | Xinjiang  | Sichuan   | 10.64435549               | 0.977<br>95% HPD [2.8646E-4, 2.8708] | 0.534051772           | 2055                                      |
|             | Hunan     | Hong Kong | 9.689643112               | 0.948<br>95% HPD [3.8446E-5, 2.8427] | 0.510609932           | 664                                       |
|             | Sichuan   | Xinjiang  | 9.198651778               | 0.956<br>95% HPD [2.3529E-5, 2.8898] | 0.497611377           | 2055                                      |
|             | Guizhou   | Hunan     | 4.679946158               | 0.985<br>95% HPD [5.1355E-5, 2.9192] | 0.335073881           | 645                                       |
|             | Guizhou   | Fujian    | 4.578014832               | 0.972<br>95% HPD [1.0625E-3, 2.9075] | 0.330185535           | 1255                                      |
|             | Fujian    | Guizhou   | 4.43688389                | 0.977<br>95% HPD [3.2799E-4, 2.9369] | 0.323297411           | 1255                                      |
|             | Xinjiang  | Chongqing | 4.380785762               | 0.98<br>95% HPD [6.1844E-4, 2.8901]  | 0.320519942           | 2305                                      |

|  |           |           |             |                                      |             |      |
|--|-----------|-----------|-------------|--------------------------------------|-------------|------|
|  | Hunan     | Guizhou   | 4.059987592 | 0.938<br>95% HPD [1.2017E-4, 2.7141] | 0.304188424 | 645  |
|  | Hong Kong | Guangdong | 3.935427321 | 0.949<br>95% HPD [7.0338E-4, 2.931]  | 0.297633596 | 131  |
|  | Yunnan    | Zhejiang  | 3.908293767 | 0.948<br>95% HPD [1.4162E-4, 2.8299] | 0.296189312 | 1811 |
|  | Fujian    | Hunan     | 3.839913829 | 1.246<br>95% HPD [7.6636E-5, 3.2851] | 0.292523053 | 667  |
|  | Hong Kong | Chongqing | 3.790626435 | 0.951<br>95% HPD [5.4916E-5, 2.7788] | 0.289856683 | 1107 |
|  | Sichuan   | Chongqing | 3.650964833 | 1.09<br>95% HPD [2.9583E-4, 2.7848]  | 0.282190868 | 270  |
|  | Guizhou   | Hong Kong | 3.63896119  | 0.944<br>95% HPD [1.2155E-4, 2.9185] | 0.281524275 | 892  |
|  | Hong Kong | Sichuan   | 3.626979799 | 0.945<br>95% HPD [3.1248E-5, 2.8553] | 0.280857682 | 1366 |
|  | Yunnan    | Guangdong | 3.565428108 | 0.991<br>95% HPD [1.6741E-3, 2.9161] | 0.277413621 | 1092 |
|  | Fujian    | Hong Kong | 3.35167502  | 0.998<br>95% HPD [1.9316E-4, 2.9533] | 0.265192756 | 666  |
|  | Hunan     | Fujian    | 3.292713733 | 0.966<br>95% HPD [3.2747E-4, 2.8786] | 0.261748695 | 667  |

|             |           |           |             |                                      |             |      |
|-------------|-----------|-----------|-------------|--------------------------------------|-------------|------|
|             | Hong Kong | Hunan     | 3.08603167  | 1.08<br>95% HPD [3.0683E-4, 2.9202]  | 0.249416731 | 664  |
| 2.3.4.4h HA | Shanxi    | Xinjiang  | 137647.0027 | 0.985<br>95% HPD [6.9911E-5, 2.9721] | 1           | 2189 |
|             | Shanxi    | Jiangsu   | 68815.8543  | 1.088<br>95% HPD [7.3702E-5, 3.1412] | 0.999777802 | 858  |
|             | Shanxi    | Guangxi   | 342.2702959 | 1.006<br>95% HPD [1.634E-3, 2.8334]  | 0.957226975 | 1718 |
|             | Anhui     | Shandong  | 283.3225845 | 0.969<br>95% HPD [1.3538E-3, 2.9199] | 0.948783469 | 534  |
|             | Shanxi    | Henan     | 176.436107  | 1.151<br>95% HPD [3.0579E-4, 3.0305] | 0.920231085 | 357  |
|             | Chongqing | Guangdong | 154.6593415 | 0.997<br>95% HPD [1.3918E-3, 2.9171] | 0.910009999 | 976  |
|             | Shanxi    | Anhui     | 117.9704547 | 0.94<br>95% HPD [5.1146E-5, 2.914]   | 0.885234974 | 792  |
|             | Guangxi   | Hunan     | 59.40056945 | 1.025<br>95% HPD [4.8296E-3, 2.8584] | 0.795244973 | 758  |
|             | Hebei     | Hong Kong | 37.1886552  | 0.975<br>95% HPD [3.1931E-4, 3.002]  | 0.708587935 | 1748 |
|             | Chongqing | Hunan     | 34.29605315 | 1<br>95% HPD [1.8592E-3, 2.8886]     | 0.691589823 | 642  |

|  |           |           |             |                                      |             |      |
|--|-----------|-----------|-------------|--------------------------------------|-------------|------|
|  | Hunan     | Jiangxi   | 31.86666174 | 1.056<br>95% HPD [4.0394E-4, 2.9998] | 0.6757027   | 290  |
|  | Shanxi    | Hebei     | 23.92591617 | 0.97<br>95% HPD [4.6956E-4, 2.9521]  | 0.610043329 | 168  |
|  | Anhui     | Guizhou   | 21.92197316 | 0.977<br>95% HPD [1.1317E-3, 2.9991] | 0.589045662 | 1181 |
|  | Hebei     | Guangdong | 20.65843412 | 0.995<br>95% HPD [1.8693E-5, 2.8415] | 0.574602822 | 1660 |
|  | Xinjiang  | Sichuan   | 15.19587681 | 0.959<br>95% HPD [3.5149E-4, 2.8922] | 0.498389068 | 2057 |
|  | Hong Kong | Fujian    | 11.76747633 | 0.974<br>95% HPD [1.6882E-4, 2.9745] | 0.434840573 | 667  |
|  | Hebei     | Chongqing | 8.886864668 | 0.979<br>95% HPD [5.9426E-4, 2.9928] | 0.367514721 | 1190 |
|  | Shanxi    | Chongqing | 7.959654943 | 1.019<br>95% HPD [1.7912E-4, 2.9217] | 0.342295301 | 1073 |
|  | Chongqing | Fujian    | 7.62668393  | 1.02<br>95% HPD [5.2197E-4, 2.881]   | 0.332740807 | 1308 |
|  | Chongqing | Hebei     | 6.108608865 | 0.99<br>95% HPD [2.7566E-3, 2.8778]  | 0.285412732 | 1190 |
|  | Hebei     | Fujian    | 4.962259515 | 0.935<br>95% HPD [6.0006E-4, 2.9057] | 0.244972781 | 1404 |

|  |           |           |             |                                      |             |      |
|--|-----------|-----------|-------------|--------------------------------------|-------------|------|
|  | Fujian    | Shanxi    | 4.899859077 | 0.996<br>95% HPD [1.3933E-3, 2.8821] | 0.242639707 | 1453 |
|  | Fujian    | Hunan     | 4.787915841 | 0.961<br>95% HPD [7.3994E-5, 2.8888] | 0.238417954 | 667  |
|  | Shanxi    | Shandong  | 4.714943359 | 0.994<br>95% HPD [2.2019E-4, 2.9326] | 0.235640484 | 415  |
|  | Xinjiang  | Chongqing | 4.61654766  | 0.98<br>95% HPD [9.7682E-4, 2.9813]  | 0.231863126 | 2306 |
|  | Hebei     | Shandong  | 4.307525612 | 0.941<br>95% HPD [3.1327E-5, 2.8385] | 0.219753361 | 272  |
|  | Xinjiang  | Hebei     | 4.268528466 | 0.997<br>95% HPD [1.9588E-4, 2.9368] | 0.218197978 | 2332 |
|  | Xinjiang  | Hainan    | 3.919049345 | 0.924<br>95% HPD [3.0884E-3, 2.8984] | 0.203977336 | 3501 |
|  | Chongqing | Shandong  | 3.654587393 | 0.977<br>95% HPD [2.459E-3, 3.0709]  | 0.192867459 | 1251 |
|  | Jiangsu   | Shanxi    | 3.326515779 | 1.087<br>95% HPD [3.5184E-5, 2.6818] | 0.178646817 | 858  |
|  | Xinjiang  | Guangxi   | 3.221328645 | 0.981<br>95% HPD [2.871E-4, 2.9762]  | 0.173980669 | 3006 |
|  | Jiangsu   | Hainan    | 3.019350983 | 0.993<br>95% HPD [3.5278E-4, 2.8047] | 0.16487057  | 1794 |

|  |           |         |             |                                      |             |      |
|--|-----------|---------|-------------|--------------------------------------|-------------|------|
|  | Hong Kong | Hebei   | 3.014479733 | 0.995<br>95% HPD [4.5469E-5, 2.9519] | 0.164648372 | 1748 |
|  | Shanxi    | Guizhou | 3.004745005 | 0.968<br>95% HPD [3.5259E-6, 2.9814] | 0.164203977 | 1367 |
|  | Guangxi   | Jiangxi | 3.004745005 | 1.01<br>95% HPD [3.3876E-4, 2.8935]  | 0.164203977 | 999  |

<sup>a</sup> Only statistically supported migrations with Bayes factor >3 are shown.

<sup>b</sup> 95% highest probability density (HPD).

<sup>c</sup> The inter-province distance is represented by the inter-provincial capital city distance, obtained from <https://ditu.google.com>.
