# Supplementary material for: Phylogenetic and Phylogeographic Analysis of the Highly Pathogenic H5N6 Avian Influenza Virus in China
Source: MDPI journal article supplement (doi:10.3390/v14081752), 2022-08-11
Supplement: s1 [file s1]

**Table S3. Marginal likelihoods of different combinations of clock model and tree prior.**

| Fragment | Molecular clock model                       | Coalescent tree prior     | Log marginal likelihood |
|----------|---------------------------------------------|---------------------------|-------------------------|
| HA       | Strict clock                                | Bayesian skyline          | -7007.357               |
|          | Strict clock                                | Constant size             | -7012.430               |
|          | Strict clock                                | Exponential growth        | -7007.122               |
|          | Uncorrelated lognormal relaxed clock        | Bayesian skyline          | -6976.358               |
|          | Uncorrelated lognormal relaxed clock        | Constant size             | -6986.254               |
|          | <b>Uncorrelated lognormal relaxed clock</b> | <b>Exponential growth</b> | <b>-6971.506</b>        |

The best-fitting tree prior and molecular clock model are indicated in bold font.
