# Supplementary material for: Phylogenetic and Phylogeographic Analysis of the Highly Pathogenic H5N6 Avian Influenza Virus in China
Source: Viruses. 2022 Aug 11;14(8):1752. doi: 10.3390/v14081752 (PMC9415468; doi:10.3390/v14081752)
Supplement: Supplementary file 1 [file viruses-14-01752-s001.zip]

Archive with 14 entries (14 files):
- Figure S1 2.3.4.4b MCC.pdf
- Figure S10 NS-tree.pdf
- Figure S2 2.3.4.4h MCC.pdf
- Figure S3 HA-tree.pdf
- Figure S4 NA-tree.pdf
- Figure S5 PB2-tree.pdf
- Figure S6 PB1-tree.pdf
- Figure S7 PA-tree.pdf
- Figure S8 NP-tree.pdf
- Figure S9 M-tree.pdf
- Table S1.xls
- Table S2.xlsx
- Table S3.pdf
- Table S4.pdf
