# Supplementary material for: Phylogenetic and Phylogeographic Analysis of the Highly Pathogenic H5N6 Avian Influenza Virus in China
Source: Viruses. 2022 Aug 11;14(8):1752. doi: 10.3390/v14081752 (PMC9415468; doi:10.3390/v14081752)
Supplement: Supplementary file 1 [file viruses-14-01752-s001.zip › Table S1.xls]

## Sheet: Acknowledge Table
Supplementary Table S1. All H5N6 avian influenza viruses in China during 2017‒May 2022.
Virus	Accession ID	Segment	Originating Lab	Submitting Lab	Authors	Country	Collection date
A/Goose/Guangdong/211106-2/2021(H5N6)	EPI1930183	HA	South China Agricultural University Veterinary Medicine College	South China Agricultural University	Zhang, Jiahao; Ye, Hejia; Liao, Ming; Qi, Wenbao	China	2021-Aug-01
A/Goose/Guangdong/211057/2021(H5N6)	EPI1930294	HA	South China Agricultural University Veterinary Medicine College	South China Agricultural University	Zhang, Jiahao; Ye, Hejia; Liao, Ming; Qi, Wenbao	China	2021-Aug-01
A/Goose/Sichuan/21765-8/2021(H5N6)	EPI1929412	HA	South China Agricultural University Veterinary Medicine College	South China Agricultural University	Zhang, Jiahao; Ye, Hejia; Liao, Ming; Qi, Wenbao	China	2021-Jun-01
A/Goose/Sichuan/21418-2/2021(H5N6)	EPI1929404	HA	South China Agricultural University Veterinary Medicine College	South China Agricultural University	Zhang, Jiahao; Ye, Hejia; Liao, Ming; Qi, Wenbao	China	2021-Apr-01
A/Goose/Sichuan/21406-5/2021(H5N6)	EPI1929388	HA	South China Agricultural University Veterinary Medicine College	South China Agricultural University	Zhang, Jiahao; Ye, Hejia; Liao, Ming; Qi, Wenbao	China	2021-Apr-01
A/Goose/Guangdong/PO1707260055/GZH/2017-08-02	EPI1366569	HA	Guangdong Provincial Center for Disease Control and Prevention	Guangdong Provincial Center for Disease Control and Prevention		China	2017-Aug-02
A/goose/China/Wuhu01/2019	EPI1930771	HA		Import from public-domain	Xu,N.	China	2019-Jan-09
A/goose/China/Wuhu02/2018	EPI1930770	HA		Import from public-domain	Xu,N.	China	2018-Feb-02
A/goose/HeBei/GD07/2019	EPI1897235	HA		Import from public-domain	Zhang,C.; Cui,H.; Guo,Z.; Liu,J.; Dong,S.; Chen,L.	China	2019-Mar-01
A/goose/Xinjiang/11.29_WLMQXL001-O/2017	EPI1836671	HA		Import from public-domain	Bi,Y.; Li,J.; Li,S.; Fu,G.; Jin,T.; Zhang,C.; Yang,Y.; Ma,Z.; Tian,W.; Xiao,S.; Li,L.; Yin,R.; Zhang,Y.; Wang,L.; Qin,Y.; Yao,Z.; Meng,F.; Hu,D.; Li,D.; Wong,G.; Liu,F.; Lv,N.; Fu,L.; Peng,Y.; Ma,J.; Sharshov,K.; Shestopalov,A.; Gulyaeva,M.; Gao,G.F.; Chen,J.; Shi,Y.; Liu,W.J.; Chu,D.; Huang,Y.; Liu,Y.; Liu,L.; Chen,Q.; Shi,W.	China	2017-Nov-29
A/goose/Henan/01.01_LYGL001-O/2017	EPI1836647	HA		Import from public-domain	Bi,Y.; Li,J.; Li,S.; Fu,G.; Jin,T.; Zhang,C.; Yang,Y.; Ma,Z.; Tian,W.; Xiao,S.; Li,L.; Yin,R.; Zhang,Y.; Wang,L.; Qin,Y.; Yao,Z.; Meng,F.; Hu,D.; Li,D.; Wong,G.; Liu,F.; Lv,N.; Fu,L.; Peng,Y.; Ma,J.; Sharshov,K.; Shestopalov,A.; Gulyaeva,M.; Gao,G.F.; Chen,J.; Shi,Y.; Liu,W.J.; Chu,D.; Huang,Y.; Liu,Y.; Liu,L.; Chen,Q.; Shi,W.	China	2017-Jan-01
A/goose/Guangdong/7.20_DGCP010-C/2017	EPI1836639	HA		Import from public-domain	Bi,Y.; Li,J.; Li,S.; Fu,G.; Jin,T.; Zhang,C.; Yang,Y.; Ma,Z.; Tian,W.; Xiao,S.; Li,L.; Yin,R.; Zhang,Y.; Wang,L.; Qin,Y.; Yao,Z.; Meng,F.; Hu,D.; Li,D.; Wong,G.; Liu,F.; Lv,N.; Fu,L.; Peng,Y.; Ma,J.; Sharshov,K.; Shestopalov,A.; Gulyaeva,M.; Gao,G.F.; Chen,J.; Shi,Y.; Liu,W.J.; Chu,D.; Huang,Y.; Liu,Y.; Liu,L.; Chen,Q.; Shi,W.	China	2017-Jul-02
A/goose/Fujian/3.15_FZHX0008-C/2018	EPI1836599	HA		Import from public-domain	Bi,Y.; Li,J.; Li,S.; Fu,G.; Jin,T.; Zhang,C.; Yang,Y.; Ma,Z.; Tian,W.; Xiao,S.; Li,L.; Yin,R.; Zhang,Y.; Wang,L.; Qin,Y.; Yao,Z.; Meng,F.; Hu,D.; Li,D.; Wong,G.; Liu,F.; Lv,N.; Fu,L.; Peng,Y.; Ma,J.; Sharshov,K.; Shestopalov,A.; Gulyaeva,M.; Gao,G.F.; Chen,J.; Shi,Y.; Liu,W.J.; Chu,D.; Huang,Y.; Liu,Y.; Liu,L.; Chen,Q.; Shi,W.	China	2018-Mar-15
A/goose/Fujian/10.26_FZHX0014-O/2017	EPI1836583	HA		Import from public-domain	Bi,Y.; Li,J.; Li,S.; Fu,G.; Jin,T.; Zhang,C.; Yang,Y.; Ma,Z.; Tian,W.; Xiao,S.; Li,L.; Yin,R.; Zhang,Y.; Wang,L.; Qin,Y.; Yao,Z.; Meng,F.; Hu,D.; Li,D.; Wong,G.; Liu,F.; Lv,N.; Fu,L.; Peng,Y.; Ma,J.; Sharshov,K.; Shestopalov,A.; Gulyaeva,M.; Gao,G.F.; Chen,J.; Shi,Y.; Liu,W.J.; Chu,D.; Huang,Y.; Liu,Y.; Liu,L.; Chen,Q.; Shi,W.	China	2017-Oct-26
A/goose/Fujian/10.26_FZHX0008-C/2017	EPI1836575	HA		Import from public-domain	Bi,Y.; Li,J.; Li,S.; Fu,G.; Jin,T.; Zhang,C.; Yang,Y.; Ma,Z.; Tian,W.; Xiao,S.; Li,L.; Yin,R.; Zhang,Y.; Wang,L.; Qin,Y.; Yao,Z.; Meng,F.; Hu,D.; Li,D.; Wong,G.; Liu,F.; Lv,N.; Fu,L.; Peng,Y.; Ma,J.; Sharshov,K.; Shestopalov,A.; Gulyaeva,M.; Gao,G.F.; Chen,J.; Shi,Y.; Liu,W.J.; Chu,D.; Huang,Y.; Liu,Y.; Liu,L.; Chen,Q.; Shi,W.	China	2017-Oct-26
A/goose/Fujian/10.26_FZHX0007-O/2017	EPI1836567	HA		Import from public-domain	Bi,Y.; Li,J.; Li,S.; Fu,G.; Jin,T.; Zhang,C.; Yang,Y.; Ma,Z.; Tian,W.; Xiao,S.; Li,L.; Yin,R.; Zhang,Y.; Wang,L.; Qin,Y.; Yao,Z.; Meng,F.; Hu,D.; Li,D.; Wong,G.; Liu,F.; Lv,N.; Fu,L.; Peng,Y.; Ma,J.; Sharshov,K.; Shestopalov,A.; Gulyaeva,M.; Gao,G.F.; Chen,J.; Shi,Y.; Liu,W.J.; Chu,D.; Huang,Y.; Liu,Y.; Liu,L.; Chen,Q.; Shi,W.	China	2017-Oct-26
A/goose/Fujian/10.26_FZHX0006-O/2017	EPI1836559	HA		Import from public-domain	Bi,Y.; Li,J.; Li,S.; Fu,G.; Jin,T.; Zhang,C.; Yang,Y.; Ma,Z.; Tian,W.; Xiao,S.; Li,L.; Yin,R.; Zhang,Y.; Wang,L.; Qin,Y.; Yao,Z.; Meng,F.; Hu,D.; Li,D.; Wong,G.; Liu,F.; Lv,N.; Fu,L.; Peng,Y.; Ma,J.; Sharshov,K.; Shestopalov,A.; Gulyaeva,M.; Gao,G.F.; Chen,J.; Shi,Y.; Liu,W.J.; Chu,D.; Huang,Y.; Liu,Y.; Liu,L.; Chen,Q.; Shi,W.	China	2017-Oct-26
A/goose/Fujian/10.26_FZHX0006-C/2017	EPI1836551	HA		Import from public-domain	Bi,Y.; Li,J.; Li,S.; Fu,G.; Jin,T.; Zhang,C.; Yang,Y.; Ma,Z.; Tian,W.; Xiao,S.; Li,L.; Yin,R.; Zhang,Y.; Wang,L.; Qin,Y.; Yao,Z.; Meng,F.; Hu,D.; Li,D.; Wong,G.; Liu,F.; Lv,N.; Fu,L.; Peng,Y.; Ma,J.; Sharshov,K.; Shestopalov,A.; Gulyaeva,M.; Gao,G.F.; Chen,J.; Shi,Y.; Liu,W.J.; Chu,D.; Huang,Y.; Liu,Y.; Liu,L.; Chen,Q.; Shi,W.	China	2017-Oct-26
A/goose/Fujian/10.26_FZHX0004-O/2017	EPI1836543	HA		Import from public-domain	Bi,Y.; Li,J.; Li,S.; Fu,G.; Jin,T.; Zhang,C.; Yang,Y.; Ma,Z.; Tian,W.; Xiao,S.; Li,L.; Yin,R.; Zhang,Y.; Wang,L.; Qin,Y.; Yao,Z.; Meng,F.; Hu,D.; Li,D.; Wong,G.; Liu,F.; Lv,N.; Fu,L.; Peng,Y.; Ma,J.; Sharshov,K.; Shestopalov,A.; Gulyaeva,M.; Gao,G.F.; Chen,J.; Shi,Y.; Liu,W.J.; Chu,D.; Huang,Y.; Liu,Y.; Liu,L.; Chen,Q.; Shi,W.	China	2017-Oct-26
A/goose/Fujian/10.26_FZHX0004-C/2017	EPI1836535	HA		Import from public-domain	Bi,Y.; Li,J.; Li,S.; Fu,G.; Jin,T.; Zhang,C.; Yang,Y.; Ma,Z.; Tian,W.; Xiao,S.; Li,L.; Yin,R.; Zhang,Y.; Wang,L.; Qin,Y.; Yao,Z.; Meng,F.; Hu,D.; Li,D.; Wong,G.; Liu,F.; Lv,N.; Fu,L.; Peng,Y.; Ma,J.; Sharshov,K.; Shestopalov,A.; Gulyaeva,M.; Gao,G.F.; Chen,J.; Shi,Y.; Liu,W.J.; Chu,D.; Huang,Y.; Liu,Y.; Liu,L.; Chen,Q.; Shi,W.	China	2017-Oct-26
A/goose/Fujian/10.26_FZHX0002-O/2017	EPI1836527	HA		Import from public-domain	Bi,Y.; Li,J.; Li,S.; Fu,G.; Jin,T.; Zhang,C.; Yang,Y.; Ma,Z.; Tian,W.; Xiao,S.; Li,L.; Yin,R.; Zhang,Y.; Wang,L.; Qin,Y.; Yao,Z.; Meng,F.; Hu,D.; Li,D.; Wong,G.; Liu,F.; Lv,N.; Fu,L.; Peng,Y.; Ma,J.; Sharshov,K.; Shestopalov,A.; Gulyaeva,M.; Gao,G.F.; Chen,J.; Shi,Y.; Liu,W.J.; Chu,D.; Huang,Y.; Liu,Y.; Liu,L.; Chen,Q.; Shi,W.	China	2017-Oct-26
A/goose/Fujian/10.26_FZHX0002-C/2017	EPI1836519	HA		Import from public-domain	Bi,Y.; Li,J.; Li,S.; Fu,G.; Jin,T.; Zhang,C.; Yang,Y.; Ma,Z.; Tian,W.; Xiao,S.; Li,L.; Yin,R.; Zhang,Y.; Wang,L.; Qin,Y.; Yao,Z.; Meng,F.; Hu,D.; Li,D.; Wong,G.; Liu,F.; Lv,N.; Fu,L.; Peng,Y.; Ma,J.; Sharshov,K.; Shestopalov,A.; Gulyaeva,M.; Gao,G.F.; Chen,J.; Shi,Y.; Liu,W.J.; Chu,D.; Huang,Y.; Liu,Y.; Liu,L.; Chen,Q.; Shi,W.	China	2017-Oct-26
A/goose/Hunan/1.11_YYGK92E3-OC/2018	EPI1820689	HA		Import from public-domain	Bi,Y.; Li,J.; Li,S.; Fu,G.; Jin,T.; Zhang,C.; Yang,Y.; Ma,Z.; Tian,W.; Xiao,S.; Li,L.; Yin,R.; Zhang,Y.; Wang,L.; Qin,Y.; Yao,Z.; Meng,F.; Hu,D.; Li,D.; Wong,G.; Liu,F.; Lv,N.; Fu,L.; Peng,Y.; Ma,J.; Sharshov,K.; Shestopalov,A.; Gulyaeva,M.; Gao,G.F.; Chen,J.; Shi,Y.; Liu,W.J.; Chu,D.; Huang,Y.; Liu,Y.; Liu,L.; Chen,Q.; Shi,W.	China	2018-Jan-11
A/goose/Fujian/3.15_FZHX0008-O/2018	EPI1820535	HA		Import from public-domain	Bi,Y.; Li,J.; Li,S.; Fu,G.; Jin,T.; Zhang,C.; Yang,Y.; Ma,Z.; Tian,W.; Xiao,S.; Li,L.; Yin,R.; Zhang,Y.; Wang,L.; Qin,Y.; Yao,Z.; Meng,F.; Hu,D.; Li,D.; Wong,G.; Liu,F.; Lv,N.; Fu,L.; Peng,Y.; Ma,J.; Sharshov,K.; Shestopalov,A.; Gulyaeva,M.; Gao,G.F.; Chen,J.; Shi,Y.; Liu,W.J.; Chu,D.; Huang,Y.; Liu,Y.; Liu,L.; Chen,Q.; Shi,W.	China	2018-Mar-15
A/goose/Fujian/3.15_FZHX0005-O/2018	EPI1820533	HA		Import from public-domain	Bi,Y.; Li,J.; Li,S.; Fu,G.; Jin,T.; Zhang,C.; Yang,Y.; Ma,Z.; Tian,W.; Xiao,S.; Li,L.; Yin,R.; Zhang,Y.; Wang,L.; Qin,Y.; Yao,Z.; Meng,F.; Hu,D.; Li,D.; Wong,G.; Liu,F.; Lv,N.; Fu,L.; Peng,Y.; Ma,J.; Sharshov,K.; Shestopalov,A.; Gulyaeva,M.; Gao,G.F.; Chen,J.; Shi,Y.; Liu,W.J.; Chu,D.; Huang,Y.; Liu,Y.; Liu,L.; Chen,Q.; Shi,W.	China	2018-Mar-15
A/goose/Fujian/11.23_FZHX0009-O/2017	EPI1820531	HA		Import from public-domain	Bi,Y.; Li,J.; Li,S.; Fu,G.; Jin,T.; Zhang,C.; Yang,Y.; Ma,Z.; Tian,W.; Xiao,S.; Li,L.; Yin,R.; Zhang,Y.; Wang,L.; Qin,Y.; Yao,Z.; Meng,F.; Hu,D.; Li,D.; Wong,G.; Liu,F.; Lv,N.; Fu,L.; Peng,Y.; Ma,J.; Sharshov,K.; Shestopalov,A.; Gulyaeva,M.; Gao,G.F.; Chen,J.; Shi,Y.; Liu,W.J.; Chu,D.; Huang,Y.; Liu,Y.; Liu,L.; Chen,Q.; Shi,W.	China	2017-Nov-23
A/goose/Fujian/11.23_FZHX0008-O/2017	EPI1820530	HA		Import from public-domain	Bi,Y.; Li,J.; Li,S.; Fu,G.; Jin,T.; Zhang,C.; Yang,Y.; Ma,Z.; Tian,W.; Xiao,S.; Li,L.; Yin,R.; Zhang,Y.; Wang,L.; Qin,Y.; Yao,Z.; Meng,F.; Hu,D.; Li,D.; Wong,G.; Liu,F.; Lv,N.; Fu,L.; Peng,Y.; Ma,J.; Sharshov,K.; Shestopalov,A.; Gulyaeva,M.; Gao,G.F.; Chen,J.; Shi,Y.; Liu,W.J.; Chu,D.; Huang,Y.; Liu,Y.; Liu,L.; Chen,Q.; Shi,W.	China	2017-Nov-23
A/goose/Fujian/3.15_FZHX0007-C/2018	EPI1820307	HA		Import from public-domain	Bi,Y.; Li,J.; Li,S.; Fu,G.; Jin,T.; Zhang,C.; Yang,Y.; Ma,Z.; Tian,W.; Xiao,S.; Li,L.; Yin,R.; Zhang,Y.; Wang,L.; Qin,Y.; Yao,Z.; Meng,F.; Hu,D.; Li,D.; Wong,G.; Liu,F.; Lv,N.; Fu,L.; Peng,Y.; Ma,J.; Sharshov,K.; Shestopalov,A.; Gulyaeva,M.; Gao,G.F.; Chen,J.; Shi,Y.; Liu,W.J.; Chu,D.; Huang,Y.; Liu,Y.; Liu,L.; Chen,Q.; Shi,W.	China	2018-Mar-15
A/goose/Fujian/3.15_FZHX0005-C/2018	EPI1820306	HA		Import from public-domain	Bi,Y.; Li,J.; Li,S.; Fu,G.; Jin,T.; Zhang,C.; Yang,Y.; Ma,Z.; Tian,W.; Xiao,S.; Li,L.; Yin,R.; Zhang,Y.; Wang,L.; Qin,Y.; Yao,Z.; Meng,F.; Hu,D.; Li,D.; Wong,G.; Liu,F.; Lv,N.; Fu,L.; Peng,Y.; Ma,J.; Sharshov,K.; Shestopalov,A.; Gulyaeva,M.; Gao,G.F.; Chen,J.; Shi,Y.; Liu,W.J.; Chu,D.; Huang,Y.; Liu,Y.; Liu,L.; Chen,Q.; Shi,W.	China	2018-Mar-15
A/goose/Fujian/3.15_FZHX0010-O/2018	EPI1820305	HA		Import from public-domain	Bi,Y.; Li,J.; Li,S.; Fu,G.; Jin,T.; Zhang,C.; Yang,Y.; Ma,Z.; Tian,W.; Xiao,S.; Li,L.; Yin,R.; Zhang,Y.; Wang,L.; Qin,Y.; Yao,Z.; Meng,F.; Hu,D.; Li,D.; Wong,G.; Liu,F.; Lv,N.; Fu,L.; Peng,Y.; Ma,J.; Sharshov,K.; Shestopalov,A.; Gulyaeva,M.; Gao,G.F.; Chen,J.; Shi,Y.; Liu,W.J.; Chu,D.; Huang,Y.; Liu,Y.; Liu,L.; Chen,Q.; Shi,W.	China	2018-Mar-15
A/goose/Fujian/3.15_FZHX0007-O/2018	EPI1820304	HA		Import from public-domain	Bi,Y.; Li,J.; Li,S.; Fu,G.; Jin,T.; Zhang,C.; Yang,Y.; Ma,Z.; Tian,W.; Xiao,S.; Li,L.; Yin,R.; Zhang,Y.; Wang,L.; Qin,Y.; Yao,Z.; Meng,F.; Hu,D.; Li,D.; Wong,G.; Liu,F.; Lv,N.; Fu,L.; Peng,Y.; Ma,J.; Sharshov,K.; Shestopalov,A.; Gulyaeva,M.; Gao,G.F.; Chen,J.; Shi,Y.; Liu,W.J.; Chu,D.; Huang,Y.; Liu,Y.; Liu,L.; Chen,Q.; Shi,W.	China	2018-Mar-15
A/goose/Fujian/3.15_FZHX0001-O/2018	EPI1820303	HA		Import from public-domain	Bi,Y.; Li,J.; Li,S.; Fu,G.; Jin,T.; Zhang,C.; Yang,Y.; Ma,Z.; Tian,W.; Xiao,S.; Li,L.; Yin,R.; Zhang,Y.; Wang,L.; Qin,Y.; Yao,Z.; Meng,F.; Hu,D.; Li,D.; Wong,G.; Liu,F.; Lv,N.; Fu,L.; Peng,Y.; Ma,J.; Sharshov,K.; Shestopalov,A.; Gulyaeva,M.; Gao,G.F.; Chen,J.; Shi,Y.; Liu,W.J.; Chu,D.; Huang,Y.; Liu,Y.; Liu,L.; Chen,Q.; Shi,W.	China	2018-Mar-15
A/goose/Guangdong/S4751/2021(H5N6)	EPI1997234	HA	Harbin Veterinary Research Institute (CAAS)	Harbin Veterinary Research Institute (CAAS)	Pengfei Cui, Congcong Wang	China	2021-Dec-08
A/Greylag goose/Hunan/1/2017	EPI1639975	HA	Harbin Veterinary Research Institute (CAAS)	Harbin Veterinary Research Institute (CAAS)	Yanbing,Li;Yanfang,Cui;Yulei,Li;Minghui,Li;Lu,Zhao;Deli,Wang	China	2017-Jan-08
A/Bean goose/Hubei/CH-I225/2017	EPI1009544	HA		Wuhan Institute of Virology		China	2017-Feb-24
A/Bean goose/Hubei/CH-i336/2017	EPI1009520	HA		Wuhan Institute of Virology		China	2017-Mar-06
A/Ostrich/Guangxi/GX-1/2017 (H5N6)	EPI1093302	HA	South China Agricultural University	South China Agricultural University	Jiahao, Zhang; Guangjie, Lao; Zhengji, Wei; Guanming, Su; Bo, Li; Wenbao, Qi; Ming, Liao	China	2017-Jun-28
A/Pavo cristatus/China/K10/2018	EPI1520254	HA		Import from public-domain	Li,M.; Feng,S.; Lv,S.; Luo,J.; Guo,J.; Sun,J.; He,H.	China	2018-Jan-24
A/Pavo cristatus/China/JS01/2018	EPI1520246	HA		Import from public-domain	Li,M.; Feng,S.; Lv,S.; Luo,J.; Guo,J.; Sun,J.; He,H.	China	2018-Jan-24
A/Pavo cristatus/China/JS02/2018	EPI1520238	HA		Import from public-domain	Li,M.; Feng,S.; Lv,S.; Luo,J.; Guo,J.; Sun,J.; He,H.	China	2018-Jan-24
A/Whooper swan/Xinjiang/13/2020	EPI1719038	HA	Harbin Veterinary Research Institute (CAAS)	Harbin Veterinary Research Institute (CAAS)	Yanbing,Li;Minghui,Li;Yulei,Li;Jingman,Tian;Xiaoli,Bai;Hualan,Chen	China	2020-Jan-17
A/Whooper swan/Xinjiang/12/2020	EPI1719030	HA	Harbin Veterinary Research Institute (CAAS)	Harbin Veterinary Research Institute (CAAS)	Yanbing,Li;Minghui,Li;Yulei,Li;Jingman,Tian;Xiaoli,Bai;Hualan,Chen	China	2020-Jan-17
A/Whooper swan/Xinjiang/11/2020	EPI1719022	HA	Harbin Veterinary Research Institute (CAAS)	Harbin Veterinary Research Institute (CAAS)	Yanbing,Li;Minghui,Li;Yulei,Li;Jingman,Tian;Xiaoli,Bai;Hualan,Chen	China	2020-Jan-17
A/Whooper swan/Xinjiang/10/2020	EPI1719014	HA	Harbin Veterinary Research Institute (CAAS)	Harbin Veterinary Research Institute (CAAS)	Yanbing,Li;Minghui,Li;Yulei,Li;Jingman,Tian;Xiaoli,Bai;Hualan,Chen	China	2020-Jan-16
A/Whooper swan/Xinjiang/9/2020	EPI1719006	HA	Harbin Veterinary Research Institute (CAAS)	Harbin Veterinary Research Institute (CAAS)	Yanbing,Li;Minghui,Li;Yulei,Li;Jingman,Tian;Xiaoli,Bai;Hualan,Chen	China	2020-Jan-16
A/Whooper swan/Xinjiang/8/2020	EPI1718998	HA	Harbin Veterinary Research Institute (CAAS)	Harbin Veterinary Research Institute (CAAS)	Yanbing,Li;Minghui,Li;Yulei,Li;Jingman,Tian;Xiaoli,Bai;Hualan,Chen	China	2020-Jan-16
A/Whooper swan/Xinjiang/7/2020	EPI1718990	HA	Harbin Veterinary Research Institute (CAAS)	Harbin Veterinary Research Institute (CAAS)	Yanbing,Li;Minghui,Li;Yulei,Li;Jingman,Tian;Xiaoli,Bai;Hualan,Chen	China	2020-Jan-12
A/Whooper swan/Xinjiang/6/2020	EPI1718982	HA	Harbin Veterinary Research Institute (CAAS)	Harbin Veterinary Research Institute (CAAS)	Yanbing,Li;Minghui,Li;Yulei,Li;Jingman,Tian;Xiaoli,Bai;Hualan,Chen	China	2020-Jan-08
A/Mute swan/Xinjiang/5/2020	EPI1718974	HA	Harbin Veterinary Research Institute (CAAS)	Harbin Veterinary Research Institute (CAAS)	Yanbing,Li;Minghui,Li;Yulei,Li;Jingman,Tian;Xiaoli,Bai;Hualan,Chen	China	2020-Jan-08
A/Mute swan/Xinjiang/4/2020	EPI1718966	HA	Harbin Veterinary Research Institute (CAAS)	Harbin Veterinary Research Institute (CAAS)	Yanbing,Li;Minghui,Li;Yulei,Li;Jingman,Tian;Xiaoli,Bai;Hualan,Chen	China	2020-Jan-08
A/Whooper swan/Xinjiang/3/2020	EPI1718958	HA	Harbin Veterinary Research Institute (CAAS)	Harbin Veterinary Research Institute (CAAS)	Yanbing,Li;Minghui,Li;Yulei,Li;Jingman,Tian;Xiaoli,Bai;Hualan,Chen	China	2020-Jan-04
A/Whooper swan/Xinjiang/2/2020	EPI1718950	HA	Harbin Veterinary Research Institute (CAAS)	Harbin Veterinary Research Institute (CAAS)	Yanbing,Li;Minghui,Li;Yulei,Li;Jingman,Tian;Xiaoli,Bai;Hualan,Chen	China	2020-Jan-03
A/Whooper swan/Xinjiang/1/2020	EPI1718942	HA	Harbin Veterinary Research Institute (CAAS)	Harbin Veterinary Research Institute (CAAS)	Yanbing,Li;Minghui,Li;Yulei,Li;Jingman,Tian;Xiaoli,Bai;Hualan,Chen	China	2020-Jan-03
A/Quail/Guangxi/GX-2/2017 (H5N6)	EPI1093310	HA	South China Agricultural University	South China Agricultural University	Jiahao, Zhang; Guangjie, Lao; Zhengji, Wei; Guanming, Su; Bo, Li; Wenbao, Qi; Ming, Liao	China	2017-Jul-15
A/Env/Guangdong/C17280709/HZH/2017-5-2	EPI1366575	HA	Guangdong Provincial Center for Disease Control and Prevention	Guangdong Provincial Center for Disease Control and Prevention		China	2017-May-02
A/Env/Guangdong/EN17284259/YJ/2017-7-12	EPI1366573	HA	Guangdong Provincial Center for Disease Control and Prevention	Guangdong Provincial Center for Disease Control and Prevention		China	2017-Jul-12
A/Env/Guangdong/C17285091/QY/2017-1-17	EPI1366571	HA	Guangdong Provincial Center for Disease Control and Prevention	Guangdong Provincial Center for Disease Control and Prevention		China	2017-Jan-17
A/Env/Guangdong/C17272335/SHG/2017-5-16	EPI1366570	HA	Guangdong Provincial Center for Disease Control and Prevention	Guangdong Provincial Center for Disease Control and Prevention		China	2017-May-16
A/Env/Guangdong/C172811482/MZH/2017-10-16	EPI1366566	HA	Guangdong Provincial Center for Disease Control and Prevention	Guangdong Provincial Center for Disease Control and Prevention		China	2017-Oct-16
A/Env/Guangdong/C172790591/ZHQ/2017-5-8	EPI1366565	HA	Guangdong Provincial Center for Disease Control and Prevention	Guangdong Provincial Center for Disease Control and Prevention		China	2017-May-08
A/Env/Guangdong/zhongshan/C172870590/2017-11-28	EPI1366563	HA	Guangdong Provincial Center for Disease Control and Prevention	Guangdong Provincial Center for Disease Control and Prevention		China	2017-Nov-28
A/Env/Guangdong/C17285753/QY/2017-11-21	EPI1366562	HA	Guangdong Provincial Center for Disease Control and Prevention	Guangdong Provincial Center for Disease Control and Prevention		China	2017-Nov-21
A/Env/Guangdong/C17285752/QY/2017-11-21	EPI1366561	HA	Guangdong Provincial Center for Disease Control and Prevention	Guangdong Provincial Center for Disease Control and Prevention		China	2017-Nov-21
A/Env/Guangdong/EN17275405/FSH/2017-10-18	EPI1366556	HA	Guangdong Provincial Center for Disease Control and Prevention	Guangdong Provincial Center for Disease Control and Prevention		China	2017-Oct-18
A/Env/Guangdong/C17059521/YF/2017-11-14	EPI1366555	HA	Guangdong Provincial Center for Disease Control and Prevention	Guangdong Provincial Center for Disease Control and Prevention		China	2017-Nov-14
A/Env/Guangdong/Zhaoqing/C172790995/2017-12-12	EPI1366552	HA	Guangdong Provincial Center for Disease Control and Prevention	Guangdong Provincial Center for Disease Control and Prevention		China	2017-Dec-12
A/Env/Guangdong/Foshan/C182750020/2018-01-02	EPI1366550	HA	Guangdong Provincial Center for Disease Control and Prevention	Guangdong Provincial Center for Disease Control and Prevention		China	2018-Jan-02
A/Env/Guangdong/zhanjiang/C18277135/2018-04-02	EPI1366549	HA	Guangdong Provincial Center for Disease Control and Prevention	Guangdong Provincial Center for Disease Control and Prevention		China	2018-Apr-02
A/Env/Guangdong/Shaoguan/C17272470/2018-01-16	EPI1366548	HA	Guangdong Provincial Center for Disease Control and Prevention	Guangdong Provincial Center for Disease Control and Prevention		China	2018-Jan-16
A/Env/Guangdong/zhanjiang/C17277335/2017-11-27	EPI1366547	HA	Guangdong Provincial Center for Disease Control and Prevention	Guangdong Provincial Center for Disease Control and Prevention		China	2017-Nov-27
A/Env/Guangdong/C17285757/QY/2017-11-21	EPI1366546	HA	Guangdong Provincial Center for Disease Control and Prevention	Guangdong Provincial Center for Disease Control and Prevention		China	2017-Nov-21
A/Env/Guangdong/C172790853/ZHQ/2017-10-30	EPI1366544	HA	Guangdong Provincial Center for Disease Control and Prevention	Guangdong Provincial Center for Disease Control and Prevention		China	2017-Oct-30
A/Env/Guangdong/C17059359/YF/2017-05-31	EPI1366543	HA	Guangdong Provincial Center for Disease Control and Prevention	Guangdong Provincial Center for Disease Control and Prevention		China	2017-May-31
A/Env/Guangdong/Jieyang/C18289059/2018-02-06	EPI1366542	HA	Guangdong Provincial Center for Disease Control and Prevention	Guangdong Provincial Center for Disease Control and Prevention		China	2018-Feb-06
A/Env/Guangdong/Foshan/C182750085/2018-01-30	EPI1366541	HA	Guangdong Provincial Center for Disease Control and Prevention	Guangdong Provincial Center for Disease Control and Prevention		China	2018-Jan-30
A/Env/Guangdong/zhanjiang/C18277136/2018-04-02	EPI1366540	HA	Guangdong Provincial Center for Disease Control and Prevention	Guangdong Provincial Center for Disease Control and Prevention		China	2018-Apr-02
A/Env/Guangdong/Jieyang/C17289390/2017-12-05	EPI1366539	HA	Guangdong Provincial Center for Disease Control and Prevention	Guangdong Provincial Center for Disease Control and Prevention		China	2017-Dec-05
A/Env/Guangdong/Jieyang/C17289389/2017-12-05	EPI1366538	HA	Guangdong Provincial Center for Disease Control and Prevention	Guangdong Provincial Center for Disease Control and Prevention		China	2017-Dec-05
A/Env/Guangdong/Jieyang/C17289388/2017-12-05	EPI1366537	HA	Guangdong Provincial Center for Disease Control and Prevention	Guangdong Provincial Center for Disease Control and Prevention		China	2017-Dec-05
A/Env/Guangdong/Jieyang/C17289387/2017-12-05	EPI1366536	HA	Guangdong Provincial Center for Disease Control and Prevention	Guangdong Provincial Center for Disease Control and Prevention		China	2017-Dec-05
A/Env/Guangdong/Foshan/C182750024/2018-01-09	EPI1366535	HA	Guangdong Provincial Center for Disease Control and Prevention	Guangdong Provincial Center for Disease Control and Prevention		China	2018-Jan-09
A/Env/Guangdong/C172752329/FSH/2017-11-27	EPI1366534	HA	Guangdong Provincial Center for Disease Control and Prevention	Guangdong Provincial Center for Disease Control and Prevention		China	2017-Nov-27
A/Env/Guangdong/zhongshan/C182870028/2018-01-15	EPI1366533	HA	Guangdong Provincial Center for Disease Control and Prevention	Guangdong Provincial Center for Disease Control and Prevention		China	2018-Jan-15
A/Env/Guangdong/C172752326/FSH/2017-11-27	EPI1366532	HA	Guangdong Provincial Center for Disease Control and Prevention	Guangdong Provincial Center for Disease Control and Prevention		China	2017-Nov-27
A/Env/Guangdong/C172752325/FSH/2017-11-27	EPI1366531	HA	Guangdong Provincial Center for Disease Control and Prevention	Guangdong Provincial Center for Disease Control and Prevention		China	2017-Nov-27
A/Env/Guangdong/C17272382/SHG/2017-11-14	EPI1366530	HA	Guangdong Provincial Center for Disease Control and Prevention	Guangdong Provincial Center for Disease Control and Prevention		China	2017-Nov-14
A/Env/Guangdong/Dongguan/C172863577/2017-12-04	EPI1366529	HA	Guangdong Provincial Center for Disease Control and Prevention	Guangdong Provincial Center for Disease Control and Prevention		China	2017-Dec-04
A/Env/Guangdong/Foshan/C172750528/2017-12-05	EPI1366528	HA	Guangdong Provincial Center for Disease Control and Prevention	Guangdong Provincial Center for Disease Control and Prevention		China	2017-Dec-05
A/Env/Guangdong/Foshan/C172750600/2017-12-26	EPI1366527	HA	Guangdong Provincial Center for Disease Control and Prevention	Guangdong Provincial Center for Disease Control and Prevention		China	2017-Dec-26
A/Env/Guangdong/Foshan/C172750608/2017-12-26	EPI1366526	HA	Guangdong Provincial Center for Disease Control and Prevention	Guangdong Provincial Center for Disease Control and Prevention		China	2017-Dec-26
A/Env/Guangdong/Foshan/C182753007/2018-01-02	EPI1366525	HA	Guangdong Provincial Center for Disease Control and Prevention	Guangdong Provincial Center for Disease Control and Prevention		China	2018-Jan-02
A/Env/Guangdong/Foshan/C182750200/2018-03-06	EPI1366524	HA	Guangdong Provincial Center for Disease Control and Prevention	Guangdong Provincial Center for Disease Control and Prevention		China	2018-Mar-06
A/Env/Guangdong/Qingyuan/C18285099/2018-02-28	EPI1366523	HA	Guangdong Provincial Center for Disease Control and Prevention	Guangdong Provincial Center for Disease Control and Prevention		China	2018-Feb-28
A/Env/Guangdong/Shenzhen/C18061184/2018-05-08	EPI1366522	HA	Guangdong Provincial Center for Disease Control and Prevention	Guangdong Provincial Center for Disease Control and Prevention		China	2018-May-08
A/Env/Guangdong/zhanjiang/C18277050/2018-01-29	EPI1366517	HA	Guangdong Provincial Center for Disease Control and Prevention	Guangdong Provincial Center for Disease Control and Prevention		China	2018-Jan-29
A/Env/Guangdong/Huizhou/C17280804/2017-11-21	EPI1366516	HA	Guangdong Provincial Center for Disease Control and Prevention	Guangdong Provincial Center for Disease Control and Prevention		China	2017-Nov-21
A/Env/Guangdong/zhongshan/C182870234/2018-04-24	EPI1366515	HA	Guangdong Provincial Center for Disease Control and Prevention	Guangdong Provincial Center for Disease Control and Prevention		China	2018-Apr-24
A/Env/Guangdong/Huizhou/C18280031/2018-01-22	EPI1366514	HA	Guangdong Provincial Center for Disease Control and Prevention	Guangdong Provincial Center for Disease Control and Prevention		China	2018-Jan-22
A/Env/Guangdong/Huizhou/C18280077/2018-02-22	EPI1366512	HA	Guangdong Provincial Center for Disease Control and Prevention	Guangdong Provincial Center for Disease Control and Prevention		China	2018-Feb-22
A/Env/Guangdong/zhanjiang/C18277209/2018-05-21	EPI1366511	HA	Guangdong Provincial Center for Disease Control and Prevention	Guangdong Provincial Center for Disease Control and Prevention		China	2018-May-21
A/Env/Guangdong/C172811414/MZH/2017-10-16	EPI1366510	HA	Guangdong Provincial Center for Disease Control and Prevention	Guangdong Provincial Center for Disease Control and Prevention		China	2017-Oct-16
A/Env/Guangdong/C172811415/MZH/2017-10-16	EPI1366508	HA	Guangdong Provincial Center for Disease Control and Prevention	Guangdong Provincial Center for Disease Control and Prevention		China	2017-Oct-16
A/Env/Guangdong/zhanjiang/C17277346/2017-12-05	EPI1366505	HA	Guangdong Provincial Center for Disease Control and Prevention	Guangdong Provincial Center for Disease Control and Prevention		China	2017-Dec-05
A/Env/Guangdong/C17059172/YF/2017-03-06	EPI1366503	HA	Guangdong Provincial Center for Disease Control and Prevention	Guangdong Provincial Center for Disease Control and Prevention		China	2017-Mar-06
A/Enviroment/Changzhou/768/2017	EPI1394708	HA	Jiangsu Provincial Center for Disease Control and Prevention	Jiangsu Provincial Center for Disease Control & Prevention		China	2017-Sep-19
A/Environment/Fujiansanyuan/08/2017	EPI1333869	HA	Fujian Provincial Center for Disease Control and Prevention	Fujian Center for Disease Control and Prevention		China	2017-Dec-26
A/environment/Hong Kong/WCRB-01/2018	EPI1843131	HA	Center of Influenza Research, School of Public Health, Li Ka Shing Faculty of Medicine, the University of Hong Kong	Li Ka Shing Faculty of Medicine, The University of Hong Kong	Bui, Christine HT; Kuok, Denise IT; Yeung, Hin Wo; Ng, Ka-Chun; Chu, Daniel KW; Webby, Richard J; Nicholls, John M; Peiris, JS Malik; Hui, Kenrie PY; Chan, Michael CW	Hong Kong (SAR)	2018-Jan-09
A/Env/Guangdong/172/2017	EPI1365906	HA	Guangdong Provincial Center for Disease Control and Prevention	Guangdong Provincial Center for Disease Control and Prevention		China	2017-Mar-06
A/Enviroment/Xuzhou/461/2017	EPI1258057	HA		Jiangsu Provincial Center for Disease Control & Prevention		China	2018-Jan-20
A/Enviroment/Xuzhou/4018/2018	EPI1258041	HA		Jiangsu Provincial Center for Disease Control & Prevention		China	2018-Jan-17
A/Environment/Hangzhou/E1154/2021	EPI1951375	HA	Hangzhou Center for Disease Control and Prevention	Hangzhou Center for Disease Control and Prevention	Li,J;Wang,HQ;Fang,YZ	China	2021-Dec-23
A/Environment/Hangzhou/E1153/2021	EPI1951373	HA	Hangzhou Center for Disease Control and Prevention	Hangzhou Center for Disease Control and Prevention	Li,J;Wang,HQ;Fang,YZ	China	2021-Dec-23
A/Environment/Hangzhou/E1151/2021	EPI1951359	HA	Hangzhou Center for Disease Control and Prevention	Hangzhou Center for Disease Control and Prevention	Li,J;Wang,HQ;Fang,YZ	China	2021-Dec-23
A/Environment/Hangzhou/E1150/2021	EPI1951357	HA	Hangzhou Center for Disease Control and Prevention	Hangzhou Center for Disease Control and Prevention	Li,J;Wang,HQ;Fang,YZ	China	2021-Dec-23
A/Environment/Hangzhou/E1147/2021	EPI1951343	HA	Hangzhou Center for Disease Control and Prevention	Hangzhou Center for Disease Control and Prevention	Li,J;Wang,HQ;Fang,YZ	China	2021-Dec-23
A/Jiangsu/1/2020(H5N6)	EPI1838663	HA	Nanjing Municipality Center for Disease Control & Prevention	Nanjing Center for Disease Control and Prevention		China	2020-Nov-28
A/GX-guilin/11151/2021	EPI1887789	HA	Guangxi Zhuang Autonomous Region Center for Disease Prevention and Control	Guangxi Center for Disease Prevention and Control		China	2021-Jul-14
A/GX-hechi/01/2021	EPI1887779	HA	Guangxi Zhuang Autonomous Region Center for Disease Prevention and Control	Guangxi Center for Disease Prevention and Control		China	2021-Feb-27
A/Guangdong/18SF020/2018-09-30	EPI1366513	HA	Guangdong Provincial Center for Disease Control and Prevention	Guangdong Provincial Center for Disease Control and Prevention		China	2017-Sep-30
A/Jiangsu/1/2018	EPI1326831	HA	Jiangsu Provincial Center for Disease Control and Prevention	Jiangsu Provincial Center for Disease Control & Prevention	Qi, Xian; Yu, Huiyan;Wang, Shenjiao;Deng, Fei;Bao, Changjun	China	2018-Nov-06
A/Jiangsu/1/2020 （H5N6）	EPI1838640	HA	Jiangsu Provincial Center for Disease Control & Prevention	Jiangsu Provincial Center for Disease Control & Prevention	Qi,x;Yu,hy	China	2020-Nov-25
A/Jiangsu/1/2018	EPI1326815	HA		Jiangsu Provincial Center for Disease Control & Prevention	Qi, Xian; Yu, Huiyan;Wang, Shenjiao;Deng, Fei;Bao, Changjun	China	2018-Nov-06
A/Hangzhou/01/2021	EPI1946730	HA	Hangzhou Center for Disease Control and Prevention	Hangzhou Center for Disease Control and Prevention	Li,J; Wang,HQ; Fang,YZ	China	2021-Dec-22
A/China/Original/2018	EPI1508808	HA		Import from public-domain	Dong,Z.	China	2018-Nov-06
A/Fujian-Sanyuan/21099/2017 x PR8 (CNIC-21099)	EPI1369973	HA	WHO Chinese National Influenza Center	WHO Chinese National Influenza Center	Liqi, Liu; Dayan, Wang	China	2017-Dec-25
A/Jiangsu/32888/2018	EPI1352821	HA	Jiangsu Provincial Center for Disease Control & Prevention	WHO Chinese National Influenza Center	Wang,Dayan;Zhou,Shumei;Li,Xiyan;Liu,Jia;Zhang,Ye;Bo,Hong;Shu,Yuelong	China	2018-Nov-06
A/Guangdong/18SF020/2018	EPI1352813	HA	Guangdong Provincial Center for Disease Control and Prevention	WHO Chinese National Influenza Center	Wang,Dayan;Zhou,Shumei;Li,Xiyan;Liu,Jia;Zhang,Ye;Bo,Hong;Shu,Yuelong	China	2018-Sep-29
A/Chongqing/02/2021	EPI1918712	HA	Chongqing Municipal Center for Disease Control and Prevention	WHO Chinese National Influenza Center		China	2021-Jul-09
A/Chongqing/00013/2021	EPI1848291	HA	Chongqing Municipal Center for Disease Control and Prevention	WHO Chinese National Influenza Center		China	2021-Jan-02
A/Anhui/2021-00011/2020	EPI1848299	HA	Anhui Provincial Center for Disease Control and Prevention	WHO Chinese National Influenza Center		China	2020-Dec-22
A/Fujian-Sanyuan/21099/2017	EPI1202729	HA	Fujian Provincial Center for Disease Control and Prevention	WHO Chinese National Influenza Center		China	2017-Dec-25
A/Guangxi/13486/2017	EPI1352861	HA	Guangxi Center for Disease Prevention and Control	WHO Chinese National Influenza Center	Wang,Dayan;Zhou,Shumei;Li,Xiyan;Liu,Jia;Zhang,Ye;Bo,Hong;Shu,Yuelong	China	2017-Nov-17
A/Guangxi/32797/2018	EPI1352829	HA	Guangxi Center for Disease Prevention and Control	WHO Chinese National Influenza Center	Wang,Dayan;Zhou,Shumei;Li,Xiyan;Liu,Jia;Zhang,Ye;Bo,Hong;Shu,Yuelong	China	2018-Oct-25
A/Guangxi/31906/2018	EPI1352805	HA	Guangxi Center for Disease Prevention and Control	WHO Chinese National Influenza Center	Wang,Dayan;Zhou,Shumei;Li,Xiyan;Liu,Jia;Zhang,Ye;Bo,Hong;Shu,Yuelong	China	2018-Aug-15
A/Hunan/10117/2021	EPI1921210	HA	Hunan Provincial Center for Disease Control and prevention	WHO Chinese National Influenza Center		China	2021-Sep-11
A/Hunan/09911/2021	EPI1918710	HA	Hunan Provincial Center for Disease Control and prevention	WHO Chinese National Influenza Center		China	2021-Sep-03
A/Hunan/09285/2021	EPI1918708	HA	Hunan Provincial Center for Disease Control and prevention	WHO Chinese National Influenza Center		China	2021-Aug-07
A/Sichuan/06689/2021	EPI1918700	HA	Sichuan Center for Disease Control and Prevention	WHO Chinese National Influenza Center		China	2021-Jul-05
A/Sichuan/06681/2021	EPI1883261	HA	Sichuan Center for Disease Control and Prevention	WHO Chinese National Influenza Center	Yang,Huiping; Xu,Jianan; Feng,Yuliang; Pan,Ming; Bo,Hong; Kui,Hejiang; Li,Xiyan; Tan,Min; Yang,Lei; Wang, Dayan	China	2021-Jul-03
A/Fujian-Sanyuan/21099/2017	EPI1957313	HA	CSL Ltd	WHO Collaborating Centre for Reference and Research on Influenza	Deng,Y-M; Iannello,P; Lau,H; Spirason,N; Moselen,J; Aziz,A; Komadina,N.	China	2017-Jan-01
A/Spoonbill/HK/17-18259/2017	EPI1843139	HA	Center of Influenza Research, School of Public Health, Li Ka Shing Faculty of Medicine, the University of Hong Kong	Li Ka Shing Faculty of Medicine, The University of Hong Kong	Bui, Christine HT; Kuok, Denise IT; Yeung, Hin Wo; Ng, Ka-Chun; Chu, Daniel KW; Webby, Richard J; Nicholls, John M; Peiris, JS Malik; Hui, Kenrie PY; Chan, Michael CW	Hong Kong (SAR)	2017-Dec-22
A/Waterfowl/Guangdong/PO17284158/YJ/2017-5-10	EPI1366572	HA	Guangdong Provincial Center for Disease Control and Prevention	Guangdong Provincial Center for Disease Control and Prevention		China	2017-May-10
A/Chicken/Guangdong/211106-3/2021(H5N6)	EPI1942205	HA	South China Agricultural University Veterinary Medicine College	South China Agricultural University	Zhang, Jiahao; Sang, Yunfen; Ye, Hejia; Liang, Zhaoping; Liao, Ming; Qi, Wenbao	China	2021-Aug-01
A/Chicken/Guangdong/211064-5/2021(H5N6)	EPI1930191	HA	South China Agricultural University Veterinary Medicine College	South China Agricultural University	Zhang, Jiahao; Ye, Hejia; Liao, Ming; Qi, Wenbao	China	2021-Aug-01
A/Chicken/Guangdong/211064-4/2021(H5N6)	EPI1930199	HA	South China Agricultural University Veterinary Medicine College	South China Agricultural University		China	2021-Aug-01
A/Chicken/Guangdong/211064-3/2021(H5N6)	EPI1930207	HA	South China Agricultural University Veterinary Medicine College	South China Agricultural University	Zhang, Jiahao; Ye, Hejia; Liao, Ming; Qi, Wenbao	China	2021-Aug-01
A/Chicken/Guangdong/211064-2/2021(H5N6)	EPI1930215	HA	South China Agricultural University Veterinary Medicine College	South China Agricultural University		China	2021-Aug-01
A/Chicken/Guangdong/211064-1/2021(H5N6)	EPI1930223	HA	South China Agricultural University Veterinary Medicine College	South China Agricultural University	Zhang, Jiahao; Ye, Hejia; Liao, Ming; Qi, Wenbao	China	2021-Aug-01
A/Chicken/Hebei/211021/2021(Mixed)	EPI1930338	HA	South China Agricultural University Veterinary Medicine College	South China Agricultural University		China	2021-Jun-01
A/Chicken/Sichuan/21859-5/2021(H5N6)	EPI1930370	HA	South China Agricultural University Veterinary Medicine College	South China Agricultural University	Zhang, Jiahao; Ye, Hejia; Liao, Ming; Qi, Wenbao	China	2021-Jul-01
A/Chicken/Hangzhou/E1149/2021	EPI1951383	HA	Hangzhou Center for Disease Control and Prevention	Hangzhou Center for Disease Control and Prevention	Li,J;Wang,HQ;Fang,YZ	China	2021-Dec-23
A/chicken/Guangdong/G1012/2018	EPI1255952	HA		China Animal Health and Epidemiology Center (CAHEC)		China	2018-Mar-12
A/chicken/China/LA10/2017	EPI1930775	HA		Import from public-domain	Xu,N.	China	2017-Oct-13
A/chicken/China/HJ11/2017	EPI1930774	HA		Import from public-domain	Xu,N.	China	2017-Nov-07
A/chicken/Northern China/F0130c/2018(H5N6)	EPI1973703	HA		Import from public-domain	Pu,J.; Sun,Y.; Liu,J.; Wang,Z.; Yan,S.; Qin,Z.; Li,F.; Qu,R.; Sun,H.; Wang,M.	China	2018-Jan-30
A/chicken/HeBei/CK05/2019	EPI1897232	HA		Import from public-domain	Zhang,C.; Cui,H.; Guo,Z.; Liu,J.; Dong,S.; Chen,L.	China	2019-Mar-01
A/chicken/HeBei/HB1907/2019	EPI1898065	HA		Import from public-domain	Zhang,C.; Guo,Z.; Cui,H.; Liu,J.; Dong,S.	China	2019-Mar-01
A/chicken/HeBei/HB1905/2019	EPI1897155	HA		Import from public-domain	Zhang,C.; Guo,Z.; Cui,H.; Liu,J.; Dong,S.	China	2019-Mar-01
A/chicken/Hunan/02.06_YYGK37J3-OC/2018	EPI1827599	HA		Import from public-domain	Bi,Y.; Li,J.; Li,S.; Fu,G.; Jin,T.; Zhang,C.; Yang,Y.; Ma,Z.; Tian,W.; Xiao,S.; Li,L.; Yin,R.; Zhang,Y.; Wang,L.; Qin,Y.; Yao,Z.; Meng,F.; Hu,D.; Li,D.; Wong,G.; Liu,F.; Lv,N.; Fu,L.; Peng,Y.; Ma,J.; Sharshov,K.; Shestopalov,A.; Gulyaeva,M.; Gao,G.F.; Chen,J.; Shi,Y.; Liu,W.J.; Chu,D.; Huang,Y.; Liu,Y.; Liu,L.; Chen,Q.; Shi,W.	China	2018-Feb-06
A/chicken/Fujian/11.23_FZHX0007-O/2017	EPI1825711	HA		Import from public-domain	Bi,Y.; Li,J.; Li,S.; Fu,G.; Jin,T.; Zhang,C.; Yang,Y.; Ma,Z.; Tian,W.; Xiao,S.; Li,L.; Yin,R.; Zhang,Y.; Wang,L.; Qin,Y.; Yao,Z.; Meng,F.; Hu,D.; Li,D.; Wong,G.; Liu,F.; Lv,N.; Fu,L.; Peng,Y.; Ma,J.; Sharshov,K.; Shestopalov,A.; Gulyaeva,M.; Gao,G.F.; Chen,J.; Shi,Y.; Liu,W.J.; Chu,D.; Huang,Y.; Liu,Y.; Liu,L.; Chen,Q.; Shi,W.	China	2017-Nov-23
A/chicken/Anhui/8.28_YHZGS017-O/2018	EPI1825343	HA		Import from public-domain	Bi,Y.; Li,J.; Li,S.; Fu,G.; Jin,T.; Zhang,C.; Yang,Y.; Ma,Z.; Tian,W.; Xiao,S.; Li,L.; Yin,R.; Zhang,Y.; Wang,L.; Qin,Y.; Yao,Z.; Meng,F.; Hu,D.; Li,D.; Wong,G.; Liu,F.; Lv,N.; Fu,L.; Peng,Y.; Ma,J.; Sharshov,K.; Shestopalov,A.; Gulyaeva,M.; Gao,G.F.; Chen,J.; Shi,Y.; Liu,W.J.; Chu,D.; Huang,Y.; Liu,Y.; Liu,L.; Chen,Q.; Shi,W.	China	2018-Aug-28
A/chicken/Hunan/07.26_YYGK22V3-OC/2018	EPI1827663	HA		Import from public-domain	Bi,Y.; Li,J.; Li,S.; Fu,G.; Jin,T.; Zhang,C.; Yang,Y.; Ma,Z.; Tian,W.; Xiao,S.; Li,L.; Yin,R.; Zhang,Y.; Wang,L.; Qin,Y.; Yao,Z.; Meng,F.; Hu,D.; Li,D.; Wong,G.; Liu,F.; Lv,N.; Fu,L.; Peng,Y.; Ma,J.; Sharshov,K.; Shestopalov,A.; Gulyaeva,M.; Gao,G.F.; Chen,J.; Shi,Y.; Liu,W.J.; Chu,D.; Huang,Y.; Liu,Y.; Liu,L.; Chen,Q.; Shi,W.	China	2018-Jul-26
A/chicken/Shandong/01.26_TAWL001-O/2019	EPI1833207	HA		Import from public-domain	Bi,Y.; Li,J.; Li,S.; Fu,G.; Jin,T.; Zhang,C.; Yang,Y.; Ma,Z.; Tian,W.; Xiao,S.; Li,L.; Yin,R.; Zhang,Y.; Wang,L.; Qin,Y.; Yao,Z.; Meng,F.; Hu,D.; Li,D.; Wong,G.; Liu,F.; Lv,N.; Fu,L.; Peng,Y.; Ma,J.; Sharshov,K.; Shestopalov,A.; Gulyaeva,M.; Gao,G.F.; Chen,J.; Shi,Y.; Liu,W.J.; Chu,D.; Huang,Y.; Liu,Y.; Liu,L.; Chen,Q.; Shi,W.	China	2019-Jan-26
A/chicken/Anhui/2.22_YHZGS003-O/2019	EPI1821248	HA		Import from public-domain	Bi,Y.; Li,J.; Li,S.; Fu,G.; Jin,T.; Zhang,C.; Yang,Y.; Ma,Z.; Tian,W.; Xiao,S.; Li,L.; Yin,R.; Zhang,Y.; Wang,L.; Qin,Y.; Yao,Z.; Meng,F.; Hu,D.; Li,D.; Wong,G.; Liu,F.; Lv,N.; Fu,L.; Peng,Y.; Ma,J.; Sharshov,K.; Shestopalov,A.; Gulyaeva,M.; Gao,G.F.; Chen,J.; Shi,Y.; Liu,W.J.; Chu,D.; Huang,Y.; Liu,Y.; Liu,L.; Chen,Q.; Shi,W.	China	2019-Feb-22
A/chicken/Hunan/7.26_YYGK56V3-OC/2018	EPI1821088	HA		Import from public-domain	Bi,Y.; Li,J.; Li,S.; Fu,G.; Jin,T.; Zhang,C.; Yang,Y.; Ma,Z.; Tian,W.; Xiao,S.; Li,L.; Yin,R.; Zhang,Y.; Wang,L.; Qin,Y.; Yao,Z.; Meng,F.; Hu,D.; Li,D.; Wong,G.; Liu,F.; Lv,N.; Fu,L.; Peng,Y.; Ma,J.; Sharshov,K.; Shestopalov,A.; Gulyaeva,M.; Gao,G.F.; Chen,J.; Shi,Y.; Liu,W.J.; Chu,D.; Huang,Y.; Liu,Y.; Liu,L.; Chen,Q.; Shi,W.	China	2018-Jul-26
A/chicken/Hunan/07.26_YYGK28V3-OC/2018	EPI1821087	HA		Import from public-domain	Bi,Y.; Li,J.; Li,S.; Fu,G.; Jin,T.; Zhang,C.; Yang,Y.; Ma,Z.; Tian,W.; Xiao,S.; Li,L.; Yin,R.; Zhang,Y.; Wang,L.; Qin,Y.; Yao,Z.; Meng,F.; Hu,D.; Li,D.; Wong,G.; Liu,F.; Lv,N.; Fu,L.; Peng,Y.; Ma,J.; Sharshov,K.; Shestopalov,A.; Gulyaeva,M.; Gao,G.F.; Chen,J.; Shi,Y.; Liu,W.J.; Chu,D.; Huang,Y.; Liu,Y.; Liu,L.; Chen,Q.; Shi,W.	China	2018-Jul-26
A/chicken/Hunan/04.26_YYGK19R3-OC/2018	EPI1821085	HA		Import from public-domain	Bi,Y.; Li,J.; Li,S.; Fu,G.; Jin,T.; Zhang,C.; Yang,Y.; Ma,Z.; Tian,W.; Xiao,S.; Li,L.; Yin,R.; Zhang,Y.; Wang,L.; Qin,Y.; Yao,Z.; Meng,F.; Hu,D.; Li,D.; Wong,G.; Liu,F.; Lv,N.; Fu,L.; Peng,Y.; Ma,J.; Sharshov,K.; Shestopalov,A.; Gulyaeva,M.; Gao,G.F.; Chen,J.; Shi,Y.; Liu,W.J.; Chu,D.; Huang,Y.; Liu,Y.; Liu,L.; Chen,Q.; Shi,W.	China	2018-Apr-26
A/chicken/Jiangxi/4.25_NCDZT53Q3-OC/2018	EPI1821072	HA		Import from public-domain	Bi,Y.; Li,J.; Li,S.; Fu,G.; Jin,T.; Zhang,C.; Yang,Y.; Ma,Z.; Tian,W.; Xiao,S.; Li,L.; Yin,R.; Zhang,Y.; Wang,L.; Qin,Y.; Yao,Z.; Meng,F.; Hu,D.; Li,D.; Wong,G.; Liu,F.; Lv,N.; Fu,L.; Peng,Y.; Ma,J.; Sharshov,K.; Shestopalov,A.; Gulyaeva,M.; Gao,G.F.; Chen,J.; Shi,Y.; Liu,W.J.; Chu,D.; Huang,Y.; Liu,Y.; Liu,L.; Chen,Q.; Shi,W.	China	2018-Apr-25
A/chicken/Fujian/9.24_FZHX0088-C/2018	EPI1820982	HA		Import from public-domain	Bi,Y.; Li,J.; Li,S.; Fu,G.; Jin,T.; Zhang,C.; Yang,Y.; Ma,Z.; Tian,W.; Xiao,S.; Li,L.; Yin,R.; Zhang,Y.; Wang,L.; Qin,Y.; Yao,Z.; Meng,F.; Hu,D.; Li,D.; Wong,G.; Liu,F.; Lv,N.; Fu,L.; Peng,Y.; Ma,J.; Sharshov,K.; Shestopalov,A.; Gulyaeva,M.; Gao,G.F.; Chen,J.; Shi,Y.; Liu,W.J.; Chu,D.; Huang,Y.; Liu,Y.; Liu,L.; Chen,Q.; Shi,W.	China	2018-Sep-24
A/chicken/Fujian/9.24_FZHX0068-C/2018	EPI1820974	HA		Import from public-domain	Bi,Y.; Li,J.; Li,S.; Fu,G.; Jin,T.; Zhang,C.; Yang,Y.; Ma,Z.; Tian,W.; Xiao,S.; Li,L.; Yin,R.; Zhang,Y.; Wang,L.; Qin,Y.; Yao,Z.; Meng,F.; Hu,D.; Li,D.; Wong,G.; Liu,F.; Lv,N.; Fu,L.; Peng,Y.; Ma,J.; Sharshov,K.; Shestopalov,A.; Gulyaeva,M.; Gao,G.F.; Chen,J.; Shi,Y.; Liu,W.J.; Chu,D.; Huang,Y.; Liu,Y.; Liu,L.; Chen,Q.; Shi,W.	China	2018-Sep-24
A/chicken/Fujian/9.24_FZHX0067-O/2018	EPI1820973	HA		Import from public-domain	Bi,Y.; Li,J.; Li,S.; Fu,G.; Jin,T.; Zhang,C.; Yang,Y.; Ma,Z.; Tian,W.; Xiao,S.; Li,L.; Yin,R.; Zhang,Y.; Wang,L.; Qin,Y.; Yao,Z.; Meng,F.; Hu,D.; Li,D.; Wong,G.; Liu,F.; Lv,N.; Fu,L.; Peng,Y.; Ma,J.; Sharshov,K.; Shestopalov,A.; Gulyaeva,M.; Gao,G.F.; Chen,J.; Shi,Y.; Liu,W.J.; Chu,D.; Huang,Y.; Liu,Y.; Liu,L.; Chen,Q.; Shi,W.	China	2018-Sep-24
A/chicken/Shandong/01.26_TAWL009-C/2019	EPI1820832	HA		Import from public-domain	Bi,Y.; Li,J.; Li,S.; Fu,G.; Jin,T.; Zhang,C.; Yang,Y.; Ma,Z.; Tian,W.; Xiao,S.; Li,L.; Yin,R.; Zhang,Y.; Wang,L.; Qin,Y.; Yao,Z.; Meng,F.; Hu,D.; Li,D.; Wong,G.; Liu,F.; Lv,N.; Fu,L.; Peng,Y.; Ma,J.; Sharshov,K.; Shestopalov,A.; Gulyaeva,M.; Gao,G.F.; Chen,J.; Shi,Y.; Liu,W.J.; Chu,D.; Huang,Y.; Liu,Y.; Liu,L.; Chen,Q.; Shi,W.	China	2019-Jan-26
A/chicken/Shandong/01.26_TAWL007-C/2019	EPI1833247	HA		Import from public-domain	Bi,Y.; Li,J.; Li,S.; Fu,G.; Jin,T.; Zhang,C.; Yang,Y.; Ma,Z.; Tian,W.; Xiao,S.; Li,L.; Yin,R.; Zhang,Y.; Wang,L.; Qin,Y.; Yao,Z.; Meng,F.; Hu,D.; Li,D.; Wong,G.; Liu,F.; Lv,N.; Fu,L.; Peng,Y.; Ma,J.; Sharshov,K.; Shestopalov,A.; Gulyaeva,M.; Gao,G.F.; Chen,J.; Shi,Y.; Liu,W.J.; Chu,D.; Huang,Y.; Liu,Y.; Liu,L.; Chen,Q.; Shi,W.	China	2019-Jan-26
A/chicken/Shandong/01.26_TAWL017-O/2019	EPI1820827	HA		Import from public-domain	Bi,Y.; Li,J.; Li,S.; Fu,G.; Jin,T.; Zhang,C.; Yang,Y.; Ma,Z.; Tian,W.; Xiao,S.; Li,L.; Yin,R.; Zhang,Y.; Wang,L.; Qin,Y.; Yao,Z.; Meng,F.; Hu,D.; Li,D.; Wong,G.; Liu,F.; Lv,N.; Fu,L.; Peng,Y.; Ma,J.; Sharshov,K.; Shestopalov,A.; Gulyaeva,M.; Gao,G.F.; Chen,J.; Shi,Y.; Liu,W.J.; Chu,D.; Huang,Y.; Liu,Y.; Liu,L.; Chen,Q.; Shi,W.	China	2019-Jan-26
A/chicken/Shandong/01.26_TAWL011-O/2019	EPI1820826	HA		Import from public-domain	Bi,Y.; Li,J.; Li,S.; Fu,G.; Jin,T.; Zhang,C.; Yang,Y.; Ma,Z.; Tian,W.; Xiao,S.; Li,L.; Yin,R.; Zhang,Y.; Wang,L.; Qin,Y.; Yao,Z.; Meng,F.; Hu,D.; Li,D.; Wong,G.; Liu,F.; Lv,N.; Fu,L.; Peng,Y.; Ma,J.; Sharshov,K.; Shestopalov,A.; Gulyaeva,M.; Gao,G.F.; Chen,J.; Shi,Y.; Liu,W.J.; Chu,D.; Huang,Y.; Liu,Y.; Liu,L.; Chen,Q.; Shi,W.	China	2019-Jan-26
A/chicken/Shandong/01.26_TAWL003-O/2019	EPI1820824	HA		Import from public-domain	Bi,Y.; Li,J.; Li,S.; Fu,G.; Jin,T.; Zhang,C.; Yang,Y.; Ma,Z.; Tian,W.; Xiao,S.; Li,L.; Yin,R.; Zhang,Y.; Wang,L.; Qin,Y.; Yao,Z.; Meng,F.; Hu,D.; Li,D.; Wong,G.; Liu,F.; Lv,N.; Fu,L.; Peng,Y.; Ma,J.; Sharshov,K.; Shestopalov,A.; Gulyaeva,M.; Gao,G.F.; Chen,J.; Shi,Y.; Liu,W.J.; Chu,D.; Huang,Y.; Liu,Y.; Liu,L.; Chen,Q.; Shi,W.	China	2019-Jan-26
A/chicken/Anhui/9.29_YHZGS014-O/2018	EPI1825367	HA		Import from public-domain	Bi,Y.; Li,J.; Li,S.; Fu,G.; Jin,T.; Zhang,C.; Yang,Y.; Ma,Z.; Tian,W.; Xiao,S.; Li,L.; Yin,R.; Zhang,Y.; Wang,L.; Qin,Y.; Yao,Z.; Meng,F.; Hu,D.; Li,D.; Wong,G.; Liu,F.; Lv,N.; Fu,L.; Peng,Y.; Ma,J.; Sharshov,K.; Shestopalov,A.; Gulyaeva,M.; Gao,G.F.; Chen,J.; Shi,Y.; Liu,W.J.; Chu,D.; Huang,Y.; Liu,Y.; Liu,L.; Chen,Q.; Shi,W.	China	2018-Sep-29
A/chicken/Hunan/3.07_YYGK81L3-OC/2018	EPI1820686	HA		Import from public-domain	Bi,Y.; Li,J.; Li,S.; Fu,G.; Jin,T.; Zhang,C.; Yang,Y.; Ma,Z.; Tian,W.; Xiao,S.; Li,L.; Yin,R.; Zhang,Y.; Wang,L.; Qin,Y.; Yao,Z.; Meng,F.; Hu,D.; Li,D.; Wong,G.; Liu,F.; Lv,N.; Fu,L.; Peng,Y.; Ma,J.; Sharshov,K.; Shestopalov,A.; Gulyaeva,M.; Gao,G.F.; Chen,J.; Shi,Y.; Liu,W.J.; Chu,D.; Huang,Y.; Liu,Y.; Liu,L.; Chen,Q.; Shi,W.	China	2018-Mar-07
A/chicken/Shanxi/12.01_TGRL016-O/2018	EPI1820638	HA		Import from public-domain	Bi,Y.; Li,J.; Li,S.; Fu,G.; Jin,T.; Zhang,C.; Yang,Y.; Ma,Z.; Tian,W.; Xiao,S.; Li,L.; Yin,R.; Zhang,Y.; Wang,L.; Qin,Y.; Yao,Z.; Meng,F.; Hu,D.; Li,D.; Wong,G.; Liu,F.; Lv,N.; Fu,L.; Peng,Y.; Ma,J.; Sharshov,K.; Shestopalov,A.; Gulyaeva,M.; Gao,G.F.; Chen,J.; Shi,Y.; Liu,W.J.; Chu,D.; Huang,Y.; Liu,Y.; Liu,L.; Chen,Q.; Shi,W.	China	2018-Dec-01
A/chicken/Shanxi/11.30_TGRL008-O/2018	EPI1820637	HA		Import from public-domain	Bi,Y.; Li,J.; Li,S.; Fu,G.; Jin,T.; Zhang,C.; Yang,Y.; Ma,Z.; Tian,W.; Xiao,S.; Li,L.; Yin,R.; Zhang,Y.; Wang,L.; Qin,Y.; Yao,Z.; Meng,F.; Hu,D.; Li,D.; Wong,G.; Liu,F.; Lv,N.; Fu,L.; Peng,Y.; Ma,J.; Sharshov,K.; Shestopalov,A.; Gulyaeva,M.; Gao,G.F.; Chen,J.; Shi,Y.; Liu,W.J.; Chu,D.; Huang,Y.; Liu,Y.; Liu,L.; Chen,Q.; Shi,W.	China	2018-Nov-03
A/chicken/Henan/11.29_XXHM014-C/2018	EPI1820630	HA		Import from public-domain	Bi,Y.; Li,J.; Li,S.; Fu,G.; Jin,T.; Zhang,C.; Yang,Y.; Ma,Z.; Tian,W.; Xiao,S.; Li,L.; Yin,R.; Zhang,Y.; Wang,L.; Qin,Y.; Yao,Z.; Meng,F.; Hu,D.; Li,D.; Wong,G.; Liu,F.; Lv,N.; Fu,L.; Peng,Y.; Ma,J.; Sharshov,K.; Shestopalov,A.; Gulyaeva,M.; Gao,G.F.; Chen,J.; Shi,Y.; Liu,W.J.; Chu,D.; Huang,Y.; Liu,Y.; Liu,L.; Chen,Q.; Shi,W.	China	2018-Nov-29
A/chicken/Henan/10.31_XXHM015-C/2018	EPI1820599	HA		Import from public-domain	Bi,Y.; Li,J.; Li,S.; Fu,G.; Jin,T.; Zhang,C.; Yang,Y.; Ma,Z.; Tian,W.; Xiao,S.; Li,L.; Yin,R.; Zhang,Y.; Wang,L.; Qin,Y.; Yao,Z.; Meng,F.; Hu,D.; Li,D.; Wong,G.; Liu,F.; Lv,N.; Fu,L.; Peng,Y.; Ma,J.; Sharshov,K.; Shestopalov,A.; Gulyaeva,M.; Gao,G.F.; Chen,J.; Shi,Y.; Liu,W.J.; Chu,D.; Huang,Y.; Liu,Y.; Liu,L.; Chen,Q.; Shi,W.	China	2018-Oct-31
A/chicken/Shanxi/12.01_TGRL025-C/2018	EPI1820592	HA		Import from public-domain	Bi,Y.; Li,J.; Li,S.; Fu,G.; Jin,T.; Zhang,C.; Yang,Y.; Ma,Z.; Tian,W.; Xiao,S.; Li,L.; Yin,R.; Zhang,Y.; Wang,L.; Qin,Y.; Yao,Z.; Meng,F.; Hu,D.; Li,D.; Wong,G.; Liu,F.; Lv,N.; Fu,L.; Peng,Y.; Ma,J.; Sharshov,K.; Shestopalov,A.; Gulyaeva,M.; Gao,G.F.; Chen,J.; Shi,Y.; Liu,W.J.; Chu,D.; Huang,Y.; Liu,Y.; Liu,L.; Chen,Q.; Shi,W.	China	2018-Dec-01
A/chicken/Shanxi/11.30_TGRL008-C/2018	EPI1820591	HA		Import from public-domain	Bi,Y.; Li,J.; Li,S.; Fu,G.; Jin,T.; Zhang,C.; Yang,Y.; Ma,Z.; Tian,W.; Xiao,S.; Li,L.; Yin,R.; Zhang,Y.; Wang,L.; Qin,Y.; Yao,Z.; Meng,F.; Hu,D.; Li,D.; Wong,G.; Liu,F.; Lv,N.; Fu,L.; Peng,Y.; Ma,J.; Sharshov,K.; Shestopalov,A.; Gulyaeva,M.; Gao,G.F.; Chen,J.; Shi,Y.; Liu,W.J.; Chu,D.; Huang,Y.; Liu,Y.; Liu,L.; Chen,Q.; Shi,W.	China	2018-Nov-03
A/chicken/Shanxi/11.30_TGRL017-O/2018	EPI1820589	HA		Import from public-domain	Bi,Y.; Li,J.; Li,S.; Fu,G.; Jin,T.; Zhang,C.; Yang,Y.; Ma,Z.; Tian,W.; Xiao,S.; Li,L.; Yin,R.; Zhang,Y.; Wang,L.; Qin,Y.; Yao,Z.; Meng,F.; Hu,D.; Li,D.; Wong,G.; Liu,F.; Lv,N.; Fu,L.; Peng,Y.; Ma,J.; Sharshov,K.; Shestopalov,A.; Gulyaeva,M.; Gao,G.F.; Chen,J.; Shi,Y.; Liu,W.J.; Chu,D.; Huang,Y.; Liu,Y.; Liu,L.; Chen,Q.; Shi,W.	China	2018-Nov-03
A/chicken/Shandong/12.26_TAWL015-O/2018	EPI1820583	HA		Import from public-domain	Bi,Y.; Li,J.; Li,S.; Fu,G.; Jin,T.; Zhang,C.; Yang,Y.; Ma,Z.; Tian,W.; Xiao,S.; Li,L.; Yin,R.; Zhang,Y.; Wang,L.; Qin,Y.; Yao,Z.; Meng,F.; Hu,D.; Li,D.; Wong,G.; Liu,F.; Lv,N.; Fu,L.; Peng,Y.; Ma,J.; Sharshov,K.; Shestopalov,A.; Gulyaeva,M.; Gao,G.F.; Chen,J.; Shi,Y.; Liu,W.J.; Chu,D.; Huang,Y.; Liu,Y.; Liu,L.; Chen,Q.; Shi,W.	China	2018-Dec-26
A/chicken/Shandong/12.26_TAWL007-O/2018	EPI1820581	HA		Import from public-domain	Bi,Y.; Li,J.; Li,S.; Fu,G.; Jin,T.; Zhang,C.; Yang,Y.; Ma,Z.; Tian,W.; Xiao,S.; Li,L.; Yin,R.; Zhang,Y.; Wang,L.; Qin,Y.; Yao,Z.; Meng,F.; Hu,D.; Li,D.; Wong,G.; Liu,F.; Lv,N.; Fu,L.; Peng,Y.; Ma,J.; Sharshov,K.; Shestopalov,A.; Gulyaeva,M.; Gao,G.F.; Chen,J.; Shi,Y.; Liu,W.J.; Chu,D.; Huang,Y.; Liu,Y.; Liu,L.; Chen,Q.; Shi,W.	China	2018-Dec-26
A/chicken/Guizhou/8.26_ZYLJJ014-O/2018	EPI1820580	HA		Import from public-domain	Bi,Y.; Li,J.; Li,S.; Fu,G.; Jin,T.; Zhang,C.; Yang,Y.; Ma,Z.; Tian,W.; Xiao,S.; Li,L.; Yin,R.; Zhang,Y.; Wang,L.; Qin,Y.; Yao,Z.; Meng,F.; Hu,D.; Li,D.; Wong,G.; Liu,F.; Lv,N.; Fu,L.; Peng,Y.; Ma,J.; Sharshov,K.; Shestopalov,A.; Gulyaeva,M.; Gao,G.F.; Chen,J.; Shi,Y.; Liu,W.J.; Chu,D.; Huang,Y.; Liu,Y.; Liu,L.; Chen,Q.; Shi,W.	China	2018-Aug-26
A/chicken/Guizhou/12.20_ZYLJJ017-O/2017	EPI1820105	HA		Import from public-domain	Bi,Y.; Li,J.; Li,S.; Fu,G.; Jin,T.; Zhang,C.; Yang,Y.; Ma,Z.; Tian,W.; Xiao,S.; Li,L.; Yin,R.; Zhang,Y.; Wang,L.; Qin,Y.; Yao,Z.; Meng,F.; Hu,D.; Li,D.; Wong,G.; Liu,F.; Lv,N.; Fu,L.; Peng,Y.; Ma,J.; Sharshov,K.; Shestopalov,A.; Gulyaeva,M.; Gao,G.F.; Chen,J.; Shi,Y.; Liu,W.J.; Chu,D.; Huang,Y.; Liu,Y.; Liu,L.; Chen,Q.; Shi,W.	China	2017-Dec-02
A/chicken/Fujian/11.23_FZHX0006-O/2017	EPI1820463	HA		Import from public-domain	Bi,Y.; Li,J.; Li,S.; Fu,G.; Jin,T.; Zhang,C.; Yang,Y.; Ma,Z.; Tian,W.; Xiao,S.; Li,L.; Yin,R.; Zhang,Y.; Wang,L.; Qin,Y.; Yao,Z.; Meng,F.; Hu,D.; Li,D.; Wong,G.; Liu,F.; Lv,N.; Fu,L.; Peng,Y.; Ma,J.; Sharshov,K.; Shestopalov,A.; Gulyaeva,M.; Gao,G.F.; Chen,J.; Shi,Y.; Liu,W.J.; Chu,D.; Huang,Y.; Liu,Y.; Liu,L.; Chen,Q.; Shi,W.	China	2017-Nov-23
A/chicken/Shandong/2.28_TAWM016-C/2017	EPI1820390	HA		Import from public-domain	Bi,Y.; Li,J.; Li,S.; Fu,G.; Jin,T.; Zhang,C.; Yang,Y.; Ma,Z.; Tian,W.; Xiao,S.; Li,L.; Yin,R.; Zhang,Y.; Wang,L.; Qin,Y.; Yao,Z.; Meng,F.; Hu,D.; Li,D.; Wong,G.; Liu,F.; Lv,N.; Fu,L.; Peng,Y.; Ma,J.; Sharshov,K.; Shestopalov,A.; Gulyaeva,M.; Gao,G.F.; Chen,J.; Shi,Y.; Liu,W.J.; Chu,D.; Huang,Y.; Liu,Y.; Liu,L.; Chen,Q.; Shi,W.	China	2017-Feb-28
A/chicken/Fujian/11.23_FZHX0015-O/2017	EPI1820465	HA		Import from public-domain	Bi,Y.; Li,J.; Li,S.; Fu,G.; Jin,T.; Zhang,C.; Yang,Y.; Ma,Z.; Tian,W.; Xiao,S.; Li,L.; Yin,R.; Zhang,Y.; Wang,L.; Qin,Y.; Yao,Z.; Meng,F.; Hu,D.; Li,D.; Wong,G.; Liu,F.; Lv,N.; Fu,L.; Peng,Y.; Ma,J.; Sharshov,K.; Shestopalov,A.; Gulyaeva,M.; Gao,G.F.; Chen,J.; Shi,Y.; Liu,W.J.; Chu,D.; Huang,Y.; Liu,Y.; Liu,L.; Chen,Q.; Shi,W.	China	2017-Nov-23
A/chicken/Fujian/11.23_FZHX0014-O/2017	EPI1820464	HA		Import from public-domain	Bi,Y.; Li,J.; Li,S.; Fu,G.; Jin,T.; Zhang,C.; Yang,Y.; Ma,Z.; Tian,W.; Xiao,S.; Li,L.; Yin,R.; Zhang,Y.; Wang,L.; Qin,Y.; Yao,Z.; Meng,F.; Hu,D.; Li,D.; Wong,G.; Liu,F.; Lv,N.; Fu,L.; Peng,Y.; Ma,J.; Sharshov,K.; Shestopalov,A.; Gulyaeva,M.; Gao,G.F.; Chen,J.; Shi,Y.; Liu,W.J.; Chu,D.; Huang,Y.; Liu,Y.; Liu,L.; Chen,Q.; Shi,W.	China	2017-Nov-23
A/chicken/Shandong/8.28_TAWM017-O/2017	EPI1820393	HA		Import from public-domain	Bi,Y.; Li,J.; Li,S.; Fu,G.; Jin,T.; Zhang,C.; Yang,Y.; Ma,Z.; Tian,W.; Xiao,S.; Li,L.; Yin,R.; Zhang,Y.; Wang,L.; Qin,Y.; Yao,Z.; Meng,F.; Hu,D.; Li,D.; Wong,G.; Liu,F.; Lv,N.; Fu,L.; Peng,Y.; Ma,J.; Sharshov,K.; Shestopalov,A.; Gulyaeva,M.; Gao,G.F.; Chen,J.; Shi,Y.; Liu,W.J.; Chu,D.; Huang,Y.; Liu,Y.; Liu,L.; Chen,Q.; Shi,W.	China	2017-Aug-28
A/chicken/Guizhou/10.28_ZYLJJ008-C/2018	EPI1820150	HA		Import from public-domain	Bi,Y.; Li,J.; Li,S.; Fu,G.; Jin,T.; Zhang,C.; Yang,Y.; Ma,Z.; Tian,W.; Xiao,S.; Li,L.; Yin,R.; Zhang,Y.; Wang,L.; Qin,Y.; Yao,Z.; Meng,F.; Hu,D.; Li,D.; Wong,G.; Liu,F.; Lv,N.; Fu,L.; Peng,Y.; Ma,J.; Sharshov,K.; Shestopalov,A.; Gulyaeva,M.; Gao,G.F.; Chen,J.; Shi,Y.; Liu,W.J.; Chu,D.; Huang,Y.; Liu,Y.; Liu,L.; Chen,Q.; Shi,W.	China	2018-Oct-28
A/chicken/Hunan/03.07_YYGK74L3-OC/2018	EPI1820035	HA		Import from public-domain	Bi,Y.; Li,J.; Li,S.; Fu,G.; Jin,T.; Zhang,C.; Yang,Y.; Ma,Z.; Tian,W.; Xiao,S.; Li,L.; Yin,R.; Zhang,Y.; Wang,L.; Qin,Y.; Yao,Z.; Meng,F.; Hu,D.; Li,D.; Wong,G.; Liu,F.; Lv,N.; Fu,L.; Peng,Y.; Ma,J.; Sharshov,K.; Shestopalov,A.; Gulyaeva,M.; Gao,G.F.; Chen,J.; Shi,Y.; Liu,W.J.; Chu,D.; Huang,Y.; Liu,Y.; Liu,L.; Chen,Q.; Shi,W.	China	2018-Mar-07
A/chicken/Shanxi/04.28_TGRL024-O/2018	EPI1819894	HA		Import from public-domain	Bi,Y.; Li,J.; Li,S.; Fu,G.; Jin,T.; Zhang,C.; Yang,Y.; Ma,Z.; Tian,W.; Xiao,S.; Li,L.; Yin,R.; Zhang,Y.; Wang,L.; Qin,Y.; Yao,Z.; Meng,F.; Hu,D.; Li,D.; Wong,G.; Liu,F.; Lv,N.; Fu,L.; Peng,Y.; Ma,J.; Sharshov,K.; Shestopalov,A.; Gulyaeva,M.; Gao,G.F.; Chen,J.; Shi,Y.; Liu,W.J.; Chu,D.; Huang,Y.; Liu,Y.; Liu,L.; Chen,Q.; Shi,W.	China	2018-Apr-28
A/chicken/Shanxi/04.28_TGRL001-O/2018	EPI1819893	HA		Import from public-domain	Bi,Y.; Li,J.; Li,S.; Fu,G.; Jin,T.; Zhang,C.; Yang,Y.; Ma,Z.; Tian,W.; Xiao,S.; Li,L.; Yin,R.; Zhang,Y.; Wang,L.; Qin,Y.; Yao,Z.; Meng,F.; Hu,D.; Li,D.; Wong,G.; Liu,F.; Lv,N.; Fu,L.; Peng,Y.; Ma,J.; Sharshov,K.; Shestopalov,A.; Gulyaeva,M.; Gao,G.F.; Chen,J.; Shi,Y.; Liu,W.J.; Chu,D.; Huang,Y.; Liu,Y.; Liu,L.; Chen,Q.; Shi,W.	China	2018-Apr-28
A/chicken/Sichuan/k141/2017	EPI1785731	HA		Import from public-domain	Xu,L.; Gu,M.; Ge,Z.; Wang,X.; Zhang,J.; Song,Q.; Hu,J.; Liu,X.; Hu,S.	China	2017-Jan-12
A/Duck/Sichuan/21957-1/2021(H5N6)	EPI1930346	HA	South China Agricultural University Veterinary Medicine College	South China Agricultural University		China	2021-Jul-01
A/Duck/Sichuan/21921-1/2021(H5N6)	EPI1930354	HA	South China Agricultural University Veterinary Medicine College	South China Agricultural University		China	2021-Jul-01
A/Duck/Sichuan/21898/2021(H5N6)	EPI1930362	HA	South China Agricultural University Veterinary Medicine College	South China Agricultural University	Zhang, Jiahao; Ye, Hejia; Liao, Ming; Qi, Wenbao	China	2021-Jul-01
A/Duck/Sichuan/21840-5/2021(H5N6)	EPI1929437	HA	South China Agricultural University Veterinary Medicine College	South China Agricultural University	Zhang, Jiahao; Ye, Hejia; Liao, Ming; Qi, Wenbao	China	2021-Jul-01
A/Duck/Sichuan/21826-5/2021(H5N6)	EPI1929429	HA	South China Agricultural University Veterinary Medicine College	South China Agricultural University	Zhang, Jiahao; Ye, Hejia; Liao, Ming; Qi, Wenbao	China	2021-Jul-01
A/Duck/Sichuan/21826-1/2021(H5N6)	EPI1929421	HA	South China Agricultural University Veterinary Medicine College	South China Agricultural University	Zhang, Jiahao; Ye, Hejia; Liao, Ming; Qi, Wenbao	China	2021-Jul-01
A/Duck/Sichuan/21406-8/2021(H5N6)	EPI1929397	HA	South China Agricultural University Veterinary Medicine College	South China Agricultural University	Zhang, Jiahao; Ye, Hejia; Liao, Ming; Qi, Wenbao	China	2021-Apr-01
A/Duck/Guangdong/21314/2021(H5N6)	EPI1929380	HA	South China Agricultural University Veterinary Medicine College	South China Agricultural University	Zhang, Jiahao; Ye, Hejia; Liao, Ming; Qi, Wenbao	China	2021-Mar-01
A/Duck/Guangdong/PO17284260/YJ/2017-7-12	EPI1366574	HA	Guangdong Provincial Center for Disease Control and Prevention	Guangdong Provincial Center for Disease Control and Prevention		China	2017-Jul-12
A/Duck/Guangdong/Yangjiang/PO18284009/2018-01-09	EPI1366564	HA	Guangdong Provincial Center for Disease Control and Prevention	Guangdong Provincial Center for Disease Control and Prevention		China	2018-Jan-09
A/Duck/Guangdong/PO1707260017/GZH/2017-08-02	EPI1366551	HA	Guangdong Provincial Center for Disease Control and Prevention	Guangdong Provincial Center for Disease Control and Prevention		China	2017-Aug-02
A/Duck/Guangdong/PO17281388/MZH/2017-10-24	EPI1366509	HA	Guangdong Provincial Center for Disease Control and Prevention	Guangdong Provincial Center for Disease Control and Prevention		China	2017-Oct-24
A/Duck/Guangdong/PO17281256/MZH/2017-8-21	EPI1366506	HA	Guangdong Provincial Center for Disease Control and Prevention	Guangdong Provincial Center for Disease Control and Prevention		China	2017-Aug-21
A/duck/Guangdong/G1378/2018	EPI1255953	HA		China Animal Health and Epidemiology Center (CAHEC)		China	2018-Mar-13
A/duck/China/FJ1935/2019	EPI1931980	HA		Import from public-domain	Zhang,R.; Huang,Y.; Liu,C.R.	China	2019-Mar-01
A/duck/China/FJ19332/2019	EPI1931979	HA		Import from public-domain	Zhang,R.; Huang,Y.; Liu,C.R.	China	2019-Dec-01
A/duck/China/FJ19323/2019	EPI1931978	HA		Import from public-domain	Zhang,R.; Huang,Y.; Liu,C.R.	China	2019-Dec-01
A/duck/China/FJ1931/2019	EPI1931977	HA		Import from public-domain	Zhang,R.; Huang,Y.; Liu,C.R.	China	2019-Mar-01
A/duck/China/FJ1923/2019	EPI1931976	HA		Import from public-domain	Zhang,R.; Huang,Y.; Liu,C.R.	China	2019-Mar-01
A/duck/China/FJ1922/2019	EPI1931975	HA		Import from public-domain	Zhang,R.; Huang,Y.; Liu,C.R.	China	2019-Mar-01
A/duck/China/FJ1921/2019	EPI1931974	HA		Import from public-domain	Zhang,R.; Huang,Y.; Liu,C.R.	China	2019-Mar-01
A/duck/China/FJ1915/2019	EPI1931973	HA		Import from public-domain	Zhang,R.; Huang,Y.; Liu,C.R.	China	2019-Mar-01
A/duck/China/FJ1914/2019	EPI1931972	HA		Import from public-domain	Zhang,R.; Huang,Y.; Liu,C.R.	China	2019-Feb-01
A/duck/China/FJ1904/2019	EPI1931971	HA		Import from public-domain	Zhang,R.; Huang,Y.; Liu,C.R.	China	2019-Feb-01
A/duck/China/FJ1854/2018	EPI1931970	HA		Import from public-domain	Zhang,R.; Huang,Y.; Liu,C.R.	China	2018-Feb-01
A/duck/China/FJ18299/2018	EPI1931969	HA		Import from public-domain	Zhang,R.; Huang,Y.; Liu,C.R.	China	2018-Nov-01
A/duck/China/FJ1829/2019	EPI1931968	HA		Import from public-domain	Zhang,R.; Huang,Y.; Liu,C.R.	China	2019-Dec-01
A/duck/China/FJ18271/2018	EPI1931967	HA		Import from public-domain	Zhang,R.; Huang,Y.; Liu,C.R.	China	2018-Dec-01
A/duck/China/FJ18262/2018	EPI1931966	HA		Import from public-domain	Zhang,R.; Huang,Y.; Liu,C.R.	China	2018-Dec-01
A/duck/China/FJ18252/2019	EPI1931965	HA		Import from public-domain	Zhang,R.; Huang,Y.; Liu,C.R.	China	2019-Dec-01
A/duck/China/FJ18248/2019	EPI1931964	HA		Import from public-domain	Zhang,R.; Huang,Y.; Liu,C.R.	China	2019-Dec-01
A/duck/China/FJ18231/2019	EPI1931963	HA		Import from public-domain	Zhang,R.; Huang,Y.; Liu,C.R.	China	2019-Nov-01
A/duck/China/FJ19179/2017	EPI1931956	HA		Import from public-domain	Zhang,R.; Huang,Y.; Liu,C.R.	China	2017-Feb-01
A/duck/China/FJ17152/2017	EPI1931955	HA		Import from public-domain	Zhang,R.; Huang,Y.; Liu,C.R.	China	2017-Oct-01
A/duck/China/FJ17139/2017	EPI1931954	HA		Import from public-domain	Zhang,R.; Huang,Y.; Liu,C.R.	China	2017-Oct-01
A/duck/China/FJ18220/2018	EPI1931947	HA		Import from public-domain	Zhang,R.; Huang,Y.; Liu,C.R.	China	2018-Nov-01
A/duck/China/FJ18212/2018	EPI1931946	HA		Import from public-domain	Zhang,R.; Huang,Y.; Liu,C.R.	China	2018-Nov-01
A/duck/China/FJ18210/2018	EPI1931945	HA		Import from public-domain	Zhang,R.; Huang,Y.; Liu,C.R.	China	2018-Nov-01
A/duck/China/FJ18203/2018	EPI1931943	HA		Import from public-domain	Zhang,R.; Huang,Y.; Liu,C.R.	China	2018-Nov-01
A/duck/China/FJ1813/2018	EPI1931942	HA		Import from public-domain	Zhang,R.; Huang,Y.; Liu,C.R.	China	2018-Mar-01
A/duck/China/FJ18108/2018	EPI1931940	HA		Import from public-domain	Zhang,R.; Huang,Y.; Liu,C.R.	China	2018-Mar-01
A/duck/China/FJ18107/2018	EPI1931938	HA		Import from public-domain	Zhang,R.; Huang,Y.; Liu,C.R.	China	2018-Mar-01
A/duck/China/FJ18106/2018	EPI1931937	HA		Import from public-domain	Zhang,R.; Huang,Y.; Liu,C.R.	China	2018-Feb-01
A/duck/China/FJ18105/2018	EPI1931936	HA		Import from public-domain	Zhang,R.; Huang,Y.; Liu,C.R.	China	2018-Feb-01
A/duck/China/FJ1808/2018	EPI1931934	HA		Import from public-domain	Zhang,R.; Huang,Y.; Liu,C.R.	China	2018-Feb-01
A/duck/China/FJ1807/2018	EPI1931932	HA		Import from public-domain	Zhang,R.; Huang,Y.; Liu,C.R.	China	2018-Jan-01
A/Duck/China/B9/2019	EPI1890300	HA		Import from public-domain	Xiang,B.; Song,J.; Chen,L.; Liang,J.; Li,X.; Ren,T.; Xu,C.	China	2019-Mar-01
A/Duck/China/B8/2019	EPI1890299	HA		Import from public-domain	Xiang,B.; Song,J.; Chen,L.; Liang,J.; Li,X.; Ren,T.; Xu,C.	China	2019-Mar-01
A/Duck/China/B7/2019	EPI1890298	HA		Import from public-domain	Xiang,B.; Song,J.; Chen,L.; Liang,J.; Li,X.; Ren,T.; Xu,C.	China	2019-Apr-01
A/Duck/China/B6/2019	EPI1890297	HA		Import from public-domain	Xiang,B.; Song,J.; Chen,L.; Liang,J.; Li,X.; Ren,T.; Xu,C.	China	2019-Mar-01
A/Duck/China/B5/2019	EPI1890296	HA		Import from public-domain	Xiang,B.; Song,J.; Chen,L.; Liang,J.; Li,X.; Ren,T.; Xu,C.	China	2019-Apr-01
A/Duck/China/B4/2019	EPI1890295	HA		Import from public-domain	Xiang,B.; Song,J.; Chen,L.; Liang,J.; Li,X.; Ren,T.; Xu,C.	China	2019-Feb-01
A/Duck/China/B3/2019	EPI1890294	HA		Import from public-domain	Xiang,B.; Song,J.; Chen,L.; Liang,J.; Li,X.; Ren,T.; Xu,C.	China	2019-Feb-01
A/Duck/China/B2/2018	EPI1890293	HA		Import from public-domain	Xiang,B.; Song,J.; Chen,L.; Liang,J.; Li,X.; Ren,T.; Xu,C.	China	2018-Dec-01
A/Duck/China/B1/2018	EPI1890292	HA		Import from public-domain	Xiang,B.; Song,J.; Chen,L.; Liang,J.; Li,X.; Ren,T.; Xu,C.	China	2018-Dec-01
A/duck/Jiangxi/5.26_NCDZT80Q2-OC/2017	EPI1835415	HA		Import from public-domain	Bi,Y.; Li,J.; Li,S.; Fu,G.; Jin,T.; Zhang,C.; Yang,Y.; Ma,Z.; Tian,W.; Xiao,S.; Li,L.; Yin,R.; Zhang,Y.; Wang,L.; Qin,Y.; Yao,Z.; Meng,F.; Hu,D.; Li,D.; Wong,G.; Liu,F.; Lv,N.; Fu,L.; Peng,Y.; Ma,J.; Sharshov,K.; Shestopalov,A.; Gulyaeva,M.; Gao,G.F.; Chen,J.; Shi,Y.; Liu,W.J.; Chu,D.; Huang,Y.; Liu,Y.; Liu,L.; Chen,Q.; Shi,W.	China	2017-May-26
A/duck/Jiangxi/2.28_NCNP25K3-OC/2018	EPI1835295	HA		Import from public-domain	Bi,Y.; Li,J.; Li,S.; Fu,G.; Jin,T.; Zhang,C.; Yang,Y.; Ma,Z.; Tian,W.; Xiao,S.; Li,L.; Yin,R.; Zhang,Y.; Wang,L.; Qin,Y.; Yao,Z.; Meng,F.; Hu,D.; Li,D.; Wong,G.; Liu,F.; Lv,N.; Fu,L.; Peng,Y.; Ma,J.; Sharshov,K.; Shestopalov,A.; Gulyaeva,M.; Gao,G.F.; Chen,J.; Shi,Y.; Liu,W.J.; Chu,D.; Huang,Y.; Liu,Y.; Liu,L.; Chen,Q.; Shi,W.	China	2018-Feb-28
A/duck/Jiangxi/2.28NCNP23K3-OC/2018	EPI1835287	HA		Import from public-domain	Bi,Y.; Li,J.; Li,S.; Fu,G.; Jin,T.; Zhang,C.; Yang,Y.; Ma,Z.; Tian,W.; Xiao,S.; Li,L.; Yin,R.; Zhang,Y.; Wang,L.; Qin,Y.; Yao,Z.; Meng,F.; Hu,D.; Li,D.; Wong,G.; Liu,F.; Lv,N.; Fu,L.; Peng,Y.; Ma,J.; Sharshov,K.; Shestopalov,A.; Gulyaeva,M.; Gao,G.F.; Chen,J.; Shi,Y.; Liu,W.J.; Chu,D.; Huang,Y.; Liu,Y.; Liu,L.; Chen,Q.; Shi,W.	China	2018-Feb-28
A/duck/Jiangxi/01.11_NCNP101G2-OC/2017	EPI1835055	HA		Import from public-domain	Bi,Y.; Li,J.; Li,S.; Fu,G.; Jin,T.; Zhang,C.; Yang,Y.; Ma,Z.; Tian,W.; Xiao,S.; Li,L.; Yin,R.; Zhang,Y.; Wang,L.; Qin,Y.; Yao,Z.; Meng,F.; Hu,D.; Li,D.; Wong,G.; Liu,F.; Lv,N.; Fu,L.; Peng,Y.; Ma,J.; Sharshov,K.; Shestopalov,A.; Gulyaeva,M.; Gao,G.F.; Chen,J.; Shi,Y.; Liu,W.J.; Chu,D.; Huang,Y.; Liu,Y.; Liu,L.; Chen,Q.; Shi,W.	China	2017-Jan-11
A/duck/Hunan/2.06_YYGK92J3-OC/2018	EPI1834951	HA		Import from public-domain	Bi,Y.; Li,J.; Li,S.; Fu,G.; Jin,T.; Zhang,C.; Yang,Y.; Ma,Z.; Tian,W.; Xiao,S.; Li,L.; Yin,R.; Zhang,Y.; Wang,L.; Qin,Y.; Yao,Z.; Meng,F.; Hu,D.; Li,D.; Wong,G.; Liu,F.; Lv,N.; Fu,L.; Peng,Y.; Ma,J.; Sharshov,K.; Shestopalov,A.; Gulyaeva,M.; Gao,G.F.; Chen,J.; Shi,Y.; Liu,W.J.; Chu,D.; Huang,Y.; Liu,Y.; Liu,L.; Chen,Q.; Shi,W.	China	2018-Feb-06
A/duck/Hunan/2.06_YYGK84J3-OC/2018	EPI1834935	HA		Import from public-domain	Bi,Y.; Li,J.; Li,S.; Fu,G.; Jin,T.; Zhang,C.; Yang,Y.; Ma,Z.; Tian,W.; Xiao,S.; Li,L.; Yin,R.; Zhang,Y.; Wang,L.; Qin,Y.; Yao,Z.; Meng,F.; Hu,D.; Li,D.; Wong,G.; Liu,F.; Lv,N.; Fu,L.; Peng,Y.; Ma,J.; Sharshov,K.; Shestopalov,A.; Gulyaeva,M.; Gao,G.F.; Chen,J.; Shi,Y.; Liu,W.J.; Chu,D.; Huang,Y.; Liu,Y.; Liu,L.; Chen,Q.; Shi,W.	China	2018-Feb-06
A/duck/Hunan/2.06_YYGK78J3-OC/2018	EPI1834927	HA		Import from public-domain	Bi,Y.; Li,J.; Li,S.; Fu,G.; Jin,T.; Zhang,C.; Yang,Y.; Ma,Z.; Tian,W.; Xiao,S.; Li,L.; Yin,R.; Zhang,Y.; Wang,L.; Qin,Y.; Yao,Z.; Meng,F.; Hu,D.; Li,D.; Wong,G.; Liu,F.; Lv,N.; Fu,L.; Peng,Y.; Ma,J.; Sharshov,K.; Shestopalov,A.; Gulyaeva,M.; Gao,G.F.; Chen,J.; Shi,Y.; Liu,W.J.; Chu,D.; Huang,Y.; Liu,Y.; Liu,L.; Chen,Q.; Shi,W.	China	2018-Feb-06
A/duck/Hunan/2.06_YYGK77J3-OC/2018	EPI1834919	HA		Import from public-domain	Bi,Y.; Li,J.; Li,S.; Fu,G.; Jin,T.; Zhang,C.; Yang,Y.; Ma,Z.; Tian,W.; Xiao,S.; Li,L.; Yin,R.; Zhang,Y.; Wang,L.; Qin,Y.; Yao,Z.; Meng,F.; Hu,D.; Li,D.; Wong,G.; Liu,F.; Lv,N.; Fu,L.; Peng,Y.; Ma,J.; Sharshov,K.; Shestopalov,A.; Gulyaeva,M.; Gao,G.F.; Chen,J.; Shi,Y.; Liu,W.J.; Chu,D.; Huang,Y.; Liu,Y.; Liu,L.; Chen,Q.; Shi,W.	China	2018-Feb-06
A/duck/Hunan/11.30_YYGK63E3-OC/2017	EPI1834703	HA		Import from public-domain	Bi,Y.; Li,J.; Li,S.; Fu,G.; Jin,T.; Zhang,C.; Yang,Y.; Ma,Z.; Tian,W.; Xiao,S.; Li,L.; Yin,R.; Zhang,Y.; Wang,L.; Qin,Y.; Yao,Z.; Meng,F.; Hu,D.; Li,D.; Wong,G.; Liu,F.; Lv,N.; Fu,L.; Peng,Y.; Ma,J.; Sharshov,K.; Shestopalov,A.; Gulyaeva,M.; Gao,G.F.; Chen,J.; Shi,Y.; Liu,W.J.; Chu,D.; Huang,Y.; Liu,Y.; Liu,L.; Chen,Q.; Shi,W.	China	2017-Nov-03
A/duck/Hunan/11.30_YYGK62E3-OC/2017	EPI1834695	HA		Import from public-domain	Bi,Y.; Li,J.; Li,S.; Fu,G.; Jin,T.; Zhang,C.; Yang,Y.; Ma,Z.; Tian,W.; Xiao,S.; Li,L.; Yin,R.; Zhang,Y.; Wang,L.; Qin,Y.; Yao,Z.; Meng,F.; Hu,D.; Li,D.; Wong,G.; Liu,F.; Lv,N.; Fu,L.; Peng,Y.; Ma,J.; Sharshov,K.; Shestopalov,A.; Gulyaeva,M.; Gao,G.F.; Chen,J.; Shi,Y.; Liu,W.J.; Chu,D.; Huang,Y.; Liu,Y.; Liu,L.; Chen,Q.; Shi,W.	China	2017-Nov-03
A/duck/Hunan/11.30_YYGK59E3-OC/2017	EPI1834687	HA		Import from public-domain	Bi,Y.; Li,J.; Li,S.; Fu,G.; Jin,T.; Zhang,C.; Yang,Y.; Ma,Z.; Tian,W.; Xiao,S.; Li,L.; Yin,R.; Zhang,Y.; Wang,L.; Qin,Y.; Yao,Z.; Meng,F.; Hu,D.; Li,D.; Wong,G.; Liu,F.; Lv,N.; Fu,L.; Peng,Y.; Ma,J.; Sharshov,K.; Shestopalov,A.; Gulyaeva,M.; Gao,G.F.; Chen,J.; Shi,Y.; Liu,W.J.; Chu,D.; Huang,Y.; Liu,Y.; Liu,L.; Chen,Q.; Shi,W.	China	2017-Nov-03
A/duck/Hunan/1.17_YYGKK80-OC/2017	EPI1834615	HA		Import from public-domain	Bi,Y.; Li,J.; Li,S.; Fu,G.; Jin,T.; Zhang,C.; Yang,Y.; Ma,Z.; Tian,W.; Xiao,S.; Li,L.; Yin,R.; Zhang,Y.; Wang,L.; Qin,Y.; Yao,Z.; Meng,F.; Hu,D.; Li,D.; Wong,G.; Liu,F.; Lv,N.; Fu,L.; Peng,Y.; Ma,J.; Sharshov,K.; Shestopalov,A.; Gulyaeva,M.; Gao,G.F.; Chen,J.; Shi,Y.; Liu,W.J.; Chu,D.; Huang,Y.; Liu,Y.; Liu,L.; Chen,Q.; Shi,W.	China	2017-Jan-17
A/duck/Hunan/1.12_YYGK74H3-OC/2018	EPI1834599	HA		Import from public-domain	Bi,Y.; Li,J.; Li,S.; Fu,G.; Jin,T.; Zhang,C.; Yang,Y.; Ma,Z.; Tian,W.; Xiao,S.; Li,L.; Yin,R.; Zhang,Y.; Wang,L.; Qin,Y.; Yao,Z.; Meng,F.; Hu,D.; Li,D.; Wong,G.; Liu,F.; Lv,N.; Fu,L.; Peng,Y.; Ma,J.; Sharshov,K.; Shestopalov,A.; Gulyaeva,M.; Gao,G.F.; Chen,J.; Shi,Y.; Liu,W.J.; Chu,D.; Huang,Y.; Liu,Y.; Liu,L.; Chen,Q.; Shi,W.	China	2018-Jan-12
A/duck/Hunan/1.12_YYGK72H3-OC/2018	EPI1834591	HA		Import from public-domain	Bi,Y.; Li,J.; Li,S.; Fu,G.; Jin,T.; Zhang,C.; Yang,Y.; Ma,Z.; Tian,W.; Xiao,S.; Li,L.; Yin,R.; Zhang,Y.; Wang,L.; Qin,Y.; Yao,Z.; Meng,F.; Hu,D.; Li,D.; Wong,G.; Liu,F.; Lv,N.; Fu,L.; Peng,Y.; Ma,J.; Sharshov,K.; Shestopalov,A.; Gulyaeva,M.; Gao,G.F.; Chen,J.; Shi,Y.; Liu,W.J.; Chu,D.; Huang,Y.; Liu,Y.; Liu,L.; Chen,Q.; Shi,W.	China	2018-Jan-12
A/duck/Hunan/1.12_YYGK68H3-OC/2018	EPI1834583	HA		Import from public-domain	Bi,Y.; Li,J.; Li,S.; Fu,G.; Jin,T.; Zhang,C.; Yang,Y.; Ma,Z.; Tian,W.; Xiao,S.; Li,L.; Yin,R.; Zhang,Y.; Wang,L.; Qin,Y.; Yao,Z.; Meng,F.; Hu,D.; Li,D.; Wong,G.; Liu,F.; Lv,N.; Fu,L.; Peng,Y.; Ma,J.; Sharshov,K.; Shestopalov,A.; Gulyaeva,M.; Gao,G.F.; Chen,J.; Shi,Y.; Liu,W.J.; Chu,D.; Huang,Y.; Liu,Y.; Liu,L.; Chen,Q.; Shi,W.	China	2018-Jan-12
A/duck/Hunan/03.24_YYGK21M2-O/2017	EPI1834511	HA		Import from public-domain	Bi,Y.; Li,J.; Li,S.; Fu,G.; Jin,T.; Zhang,C.; Yang,Y.; Ma,Z.; Tian,W.; Xiao,S.; Li,L.; Yin,R.; Zhang,Y.; Wang,L.; Qin,Y.; Yao,Z.; Meng,F.; Hu,D.; Li,D.; Wong,G.; Liu,F.; Lv,N.; Fu,L.; Peng,Y.; Ma,J.; Sharshov,K.; Shestopalov,A.; Gulyaeva,M.; Gao,G.F.; Chen,J.; Shi,Y.; Liu,W.J.; Chu,D.; Huang,Y.; Liu,Y.; Liu,L.; Chen,Q.; Shi,W.	China	2017-Mar-24
A/duck/Hunan/03.24_YYGK18M2-O/2017	EPI1834503	HA		Import from public-domain	Bi,Y.; Li,J.; Li,S.; Fu,G.; Jin,T.; Zhang,C.; Yang,Y.; Ma,Z.; Tian,W.; Xiao,S.; Li,L.; Yin,R.; Zhang,Y.; Wang,L.; Qin,Y.; Yao,Z.; Meng,F.; Hu,D.; Li,D.; Wong,G.; Liu,F.; Lv,N.; Fu,L.; Peng,Y.; Ma,J.; Sharshov,K.; Shestopalov,A.; Gulyaeva,M.; Gao,G.F.; Chen,J.; Shi,Y.; Liu,W.J.; Chu,D.; Huang,Y.; Liu,Y.; Liu,L.; Chen,Q.; Shi,W.	China	2017-Mar-24
A/duck/Hunan/03.24_YYGK178M2-C/2017	EPI1834495	HA		Import from public-domain	Bi,Y.; Li,J.; Li,S.; Fu,G.; Jin,T.; Zhang,C.; Yang,Y.; Ma,Z.; Tian,W.; Xiao,S.; Li,L.; Yin,R.; Zhang,Y.; Wang,L.; Qin,Y.; Yao,Z.; Meng,F.; Hu,D.; Li,D.; Wong,G.; Liu,F.; Lv,N.; Fu,L.; Peng,Y.; Ma,J.; Sharshov,K.; Shestopalov,A.; Gulyaeva,M.; Gao,G.F.; Chen,J.; Shi,Y.; Liu,W.J.; Chu,D.; Huang,Y.; Liu,Y.; Liu,L.; Chen,Q.; Shi,W.	China	2017-Mar-24
A/duck/Hunan/03.24_YYGK174M2-C/2017	EPI1834487	HA		Import from public-domain	Bi,Y.; Li,J.; Li,S.; Fu,G.; Jin,T.; Zhang,C.; Yang,Y.; Ma,Z.; Tian,W.; Xiao,S.; Li,L.; Yin,R.; Zhang,Y.; Wang,L.; Qin,Y.; Yao,Z.; Meng,F.; Hu,D.; Li,D.; Wong,G.; Liu,F.; Lv,N.; Fu,L.; Peng,Y.; Ma,J.; Sharshov,K.; Shestopalov,A.; Gulyaeva,M.; Gao,G.F.; Chen,J.; Shi,Y.; Liu,W.J.; Chu,D.; Huang,Y.; Liu,Y.; Liu,L.; Chen,Q.; Shi,W.	China	2017-Mar-24
A/duck/Hunan/03.07_YYGK4L3-OC/2018	EPI1834479	HA		Import from public-domain	Bi,Y.; Li,J.; Li,S.; Fu,G.; Jin,T.; Zhang,C.; Yang,Y.; Ma,Z.; Tian,W.; Xiao,S.; Li,L.; Yin,R.; Zhang,Y.; Wang,L.; Qin,Y.; Yao,Z.; Meng,F.; Hu,D.; Li,D.; Wong,G.; Liu,F.; Lv,N.; Fu,L.; Peng,Y.; Ma,J.; Sharshov,K.; Shestopalov,A.; Gulyaeva,M.; Gao,G.F.; Chen,J.; Shi,Y.; Liu,W.J.; Chu,D.; Huang,Y.; Liu,Y.; Liu,L.; Chen,Q.; Shi,W.	China	2018-Mar-07
A/duck/Hunan/01.12_YYGK82H3-OC/2018	EPI1834447	HA		Import from public-domain	Bi,Y.; Li,J.; Li,S.; Fu,G.; Jin,T.; Zhang,C.; Yang,Y.; Ma,Z.; Tian,W.; Xiao,S.; Li,L.; Yin,R.; Zhang,Y.; Wang,L.; Qin,Y.; Yao,Z.; Meng,F.; Hu,D.; Li,D.; Wong,G.; Liu,F.; Lv,N.; Fu,L.; Peng,Y.; Ma,J.; Sharshov,K.; Shestopalov,A.; Gulyaeva,M.; Gao,G.F.; Chen,J.; Shi,Y.; Liu,W.J.; Chu,D.; Huang,Y.; Liu,Y.; Liu,L.; Chen,Q.; Shi,W.	China	2018-Jan-12
A/duck/Hainan/12.29_HKPL002-C/2017	EPI1834391	HA		Import from public-domain	Bi,Y.; Li,J.; Li,S.; Fu,G.; Jin,T.; Zhang,C.; Yang,Y.; Ma,Z.; Tian,W.; Xiao,S.; Li,L.; Yin,R.; Zhang,Y.; Wang,L.; Qin,Y.; Yao,Z.; Meng,F.; Hu,D.; Li,D.; Wong,G.; Liu,F.; Lv,N.; Fu,L.; Peng,Y.; Ma,J.; Sharshov,K.; Shestopalov,A.; Gulyaeva,M.; Gao,G.F.; Chen,J.; Shi,Y.; Liu,W.J.; Chu,D.; Huang,Y.; Liu,Y.; Liu,L.; Chen,Q.; Shi,W.	China	2017-Dec-29
A/duck/Guizhou/8.26_ZYLJJ017-O/2018	EPI1834359	HA		Import from public-domain	Bi,Y.; Li,J.; Li,S.; Fu,G.; Jin,T.; Zhang,C.; Yang,Y.; Ma,Z.; Tian,W.; Xiao,S.; Li,L.; Yin,R.; Zhang,Y.; Wang,L.; Qin,Y.; Yao,Z.; Meng,F.; Hu,D.; Li,D.; Wong,G.; Liu,F.; Lv,N.; Fu,L.; Peng,Y.; Ma,J.; Sharshov,K.; Shestopalov,A.; Gulyaeva,M.; Gao,G.F.; Chen,J.; Shi,Y.; Liu,W.J.; Chu,D.; Huang,Y.; Liu,Y.; Liu,L.; Chen,Q.; Shi,W.	China	2018-Aug-26
A/duck/Fujian/11.23_FZHX0015-C/2017	EPI1833967	HA		Import from public-domain	Bi,Y.; Li,J.; Li,S.; Fu,G.; Jin,T.; Zhang,C.; Yang,Y.; Ma,Z.; Tian,W.; Xiao,S.; Li,L.; Yin,R.; Zhang,Y.; Wang,L.; Qin,Y.; Yao,Z.; Meng,F.; Hu,D.; Li,D.; Wong,G.; Liu,F.; Lv,N.; Fu,L.; Peng,Y.; Ma,J.; Sharshov,K.; Shestopalov,A.; Gulyaeva,M.; Gao,G.F.; Chen,J.; Shi,Y.; Liu,W.J.; Chu,D.; Huang,Y.; Liu,Y.; Liu,L.; Chen,Q.; Shi,W.	China	2017-Nov-23
A/duck/Fujian/11.23_FZHX0014-C/2017	EPI1833959	HA		Import from public-domain	Bi,Y.; Li,J.; Li,S.; Fu,G.; Jin,T.; Zhang,C.; Yang,Y.; Ma,Z.; Tian,W.; Xiao,S.; Li,L.; Yin,R.; Zhang,Y.; Wang,L.; Qin,Y.; Yao,Z.; Meng,F.; Hu,D.; Li,D.; Wong,G.; Liu,F.; Lv,N.; Fu,L.; Peng,Y.; Ma,J.; Sharshov,K.; Shestopalov,A.; Gulyaeva,M.; Gao,G.F.; Chen,J.; Shi,Y.; Liu,W.J.; Chu,D.; Huang,Y.; Liu,Y.; Liu,L.; Chen,Q.; Shi,W.	China	2017-Nov-23
A/duck/Fujian/11.23_FZHX0009-C/2017	EPI1833951	HA		Import from public-domain	Bi,Y.; Li,J.; Li,S.; Fu,G.; Jin,T.; Zhang,C.; Yang,Y.; Ma,Z.; Tian,W.; Xiao,S.; Li,L.; Yin,R.; Zhang,Y.; Wang,L.; Qin,Y.; Yao,Z.; Meng,F.; Hu,D.; Li,D.; Wong,G.; Liu,F.; Lv,N.; Fu,L.; Peng,Y.; Ma,J.; Sharshov,K.; Shestopalov,A.; Gulyaeva,M.; Gao,G.F.; Chen,J.; Shi,Y.; Liu,W.J.; Chu,D.; Huang,Y.; Liu,Y.; Liu,L.; Chen,Q.; Shi,W.	China	2017-Nov-23
A/duck/Fujian/10.26_FZHX0010-O/2017	EPI1833935	HA		Import from public-domain	Bi,Y.; Li,J.; Li,S.; Fu,G.; Jin,T.; Zhang,C.; Yang,Y.; Ma,Z.; Tian,W.; Xiao,S.; Li,L.; Yin,R.; Zhang,Y.; Wang,L.; Qin,Y.; Yao,Z.; Meng,F.; Hu,D.; Li,D.; Wong,G.; Liu,F.; Lv,N.; Fu,L.; Peng,Y.; Ma,J.; Sharshov,K.; Shestopalov,A.; Gulyaeva,M.; Gao,G.F.; Chen,J.; Shi,Y.; Liu,W.J.; Chu,D.; Huang,Y.; Liu,Y.; Liu,L.; Chen,Q.; Shi,W.	China	2017-Oct-26
A/duck/Fujian/10.26_FZHX0002-O/2017	EPI1833927	HA		Import from public-domain	Bi,Y.; Li,J.; Li,S.; Fu,G.; Jin,T.; Zhang,C.; Yang,Y.; Ma,Z.; Tian,W.; Xiao,S.; Li,L.; Yin,R.; Zhang,Y.; Wang,L.; Qin,Y.; Yao,Z.; Meng,F.; Hu,D.; Li,D.; Wong,G.; Liu,F.; Lv,N.; Fu,L.; Peng,Y.; Ma,J.; Sharshov,K.; Shestopalov,A.; Gulyaeva,M.; Gao,G.F.; Chen,J.; Shi,Y.; Liu,W.J.; Chu,D.; Huang,Y.; Liu,Y.; Liu,L.; Chen,Q.; Shi,W.	China	2017-Oct-26
A/duck/Fujian/1.17_FZHX0123-C/2017	EPI1833687	HA		Import from public-domain	Bi,Y.; Li,J.; Li,S.; Fu,G.; Jin,T.; Zhang,C.; Yang,Y.; Ma,Z.; Tian,W.; Xiao,S.; Li,L.; Yin,R.; Zhang,Y.; Wang,L.; Qin,Y.; Yao,Z.; Meng,F.; Hu,D.; Li,D.; Wong,G.; Liu,F.; Lv,N.; Fu,L.; Peng,Y.; Ma,J.; Sharshov,K.; Shestopalov,A.; Gulyaeva,M.; Gao,G.F.; Chen,J.; Shi,Y.; Liu,W.J.; Chu,D.; Huang,Y.; Liu,Y.; Liu,L.; Chen,Q.; Shi,W.	China	2017-Jan-17
A/duck/Hunan/06.22_YYGK90T3-OC/2018	EPI1821086	HA		Import from public-domain	Bi,Y.; Li,J.; Li,S.; Fu,G.; Jin,T.; Zhang,C.; Yang,Y.; Ma,Z.; Tian,W.; Xiao,S.; Li,L.; Yin,R.; Zhang,Y.; Wang,L.; Qin,Y.; Yao,Z.; Meng,F.; Hu,D.; Li,D.; Wong,G.; Liu,F.; Lv,N.; Fu,L.; Peng,Y.; Ma,J.; Sharshov,K.; Shestopalov,A.; Gulyaeva,M.; Gao,G.F.; Chen,J.; Shi,Y.; Liu,W.J.; Chu,D.; Huang,Y.; Liu,Y.; Liu,L.; Chen,Q.; Shi,W.	China	2018-Jun-22
A/duck/Hunan/04.26_YYGK75R3-OC/2018	EPI1821084	HA		Import from public-domain	Bi,Y.; Li,J.; Li,S.; Fu,G.; Jin,T.; Zhang,C.; Yang,Y.; Ma,Z.; Tian,W.; Xiao,S.; Li,L.; Yin,R.; Zhang,Y.; Wang,L.; Qin,Y.; Yao,Z.; Meng,F.; Hu,D.; Li,D.; Wong,G.; Liu,F.; Lv,N.; Fu,L.; Peng,Y.; Ma,J.; Sharshov,K.; Shestopalov,A.; Gulyaeva,M.; Gao,G.F.; Chen,J.; Shi,Y.; Liu,W.J.; Chu,D.; Huang,Y.; Liu,Y.; Liu,L.; Chen,Q.; Shi,W.	China	2018-Apr-26
A/duck/Jiangxi/12.17_NCNP71D4-O/2018	EPI1821081	HA		Import from public-domain	Bi,Y.; Li,J.; Li,S.; Fu,G.; Jin,T.; Zhang,C.; Yang,Y.; Ma,Z.; Tian,W.; Xiao,S.; Li,L.; Yin,R.; Zhang,Y.; Wang,L.; Qin,Y.; Yao,Z.; Meng,F.; Hu,D.; Li,D.; Wong,G.; Liu,F.; Lv,N.; Fu,L.; Peng,Y.; Ma,J.; Sharshov,K.; Shestopalov,A.; Gulyaeva,M.; Gao,G.F.; Chen,J.; Shi,Y.; Liu,W.J.; Chu,D.; Huang,Y.; Liu,Y.; Liu,L.; Chen,Q.; Shi,W.	China	2018-Dec-17
A/duck/Jiangxi/6.21_NCNP83S3-OC/2018	EPI1821075	HA		Import from public-domain	Bi,Y.; Li,J.; Li,S.; Fu,G.; Jin,T.; Zhang,C.; Yang,Y.; Ma,Z.; Tian,W.; Xiao,S.; Li,L.; Yin,R.; Zhang,Y.; Wang,L.; Qin,Y.; Yao,Z.; Meng,F.; Hu,D.; Li,D.; Wong,G.; Liu,F.; Lv,N.; Fu,L.; Peng,Y.; Ma,J.; Sharshov,K.; Shestopalov,A.; Gulyaeva,M.; Gao,G.F.; Chen,J.; Shi,Y.; Liu,W.J.; Chu,D.; Huang,Y.; Liu,Y.; Liu,L.; Chen,Q.; Shi,W.	China	2018-Jun-21
A/duck/Henan/01.01_LYGL003-O/2017	EPI1820587	HA		Import from public-domain	Bi,Y.; Li,J.; Li,S.; Fu,G.; Jin,T.; Zhang,C.; Yang,Y.; Ma,Z.; Tian,W.; Xiao,S.; Li,L.; Yin,R.; Zhang,Y.; Wang,L.; Qin,Y.; Yao,Z.; Meng,F.; Hu,D.; Li,D.; Wong,G.; Liu,F.; Lv,N.; Fu,L.; Peng,Y.; Ma,J.; Sharshov,K.; Shestopalov,A.; Gulyaeva,M.; Gao,G.F.; Chen,J.; Shi,Y.; Liu,W.J.; Chu,D.; Huang,Y.; Liu,Y.; Liu,L.; Chen,Q.; Shi,W.	China	2017-Jan-01
A/duck/Northern China/22/2017	EPI1818425	HA		Import from public-domain	Sun,H.; Song,J.; Zhang,W.; Deng,G.; Wei,X.; Li,F.; Zhang,X.; Liu,J.; Pu,J.; Sun,Y.; Tong,Q.; Bi,Y.; Qi,J.; Chang,K.-C.; Gao,G.F.	China	2017-Jan-01
A/duck/Fujian/11.09_FZHX-O/2017	EPI1820509	HA		Import from public-domain	Bi,Y.; Li,J.; Li,S.; Fu,G.; Jin,T.; Zhang,C.; Yang,Y.; Ma,Z.; Tian,W.; Xiao,S.; Li,L.; Yin,R.; Zhang,Y.; Wang,L.; Qin,Y.; Yao,Z.; Meng,F.; Hu,D.; Li,D.; Wong,G.; Liu,F.; Lv,N.; Fu,L.; Peng,Y.; Ma,J.; Sharshov,K.; Shestopalov,A.; Gulyaeva,M.; Gao,G.F.; Chen,J.; Shi,Y.; Liu,W.J.; Chu,D.; Huang,Y.; Liu,Y.; Liu,L.; Chen,Q.; Shi,W.	China	2017-Nov-09
A/duck/Fujian/10.26_FZHX0034-C/2017	EPI1820508	HA		Import from public-domain	Bi,Y.; Li,J.; Li,S.; Fu,G.; Jin,T.; Zhang,C.; Yang,Y.; Ma,Z.; Tian,W.; Xiao,S.; Li,L.; Yin,R.; Zhang,Y.; Wang,L.; Qin,Y.; Yao,Z.; Meng,F.; Hu,D.; Li,D.; Wong,G.; Liu,F.; Lv,N.; Fu,L.; Peng,Y.; Ma,J.; Sharshov,K.; Shestopalov,A.; Gulyaeva,M.; Gao,G.F.; Chen,J.; Shi,Y.; Liu,W.J.; Chu,D.; Huang,Y.; Liu,Y.; Liu,L.; Chen,Q.; Shi,W.	China	2017-Oct-26
A/duck/Guangdong/7.20_DGCP036-O/2017	EPI1820317	HA		Import from public-domain	Bi,Y.; Li,J.; Li,S.; Fu,G.; Jin,T.; Zhang,C.; Yang,Y.; Ma,Z.; Tian,W.; Xiao,S.; Li,L.; Yin,R.; Zhang,Y.; Wang,L.; Qin,Y.; Yao,Z.; Meng,F.; Hu,D.; Li,D.; Wong,G.; Liu,F.; Lv,N.; Fu,L.; Peng,Y.; Ma,J.; Sharshov,K.; Shestopalov,A.; Gulyaeva,M.; Gao,G.F.; Chen,J.; Shi,Y.; Liu,W.J.; Chu,D.; Huang,Y.; Liu,Y.; Liu,L.; Chen,Q.; Shi,W.	China	2017-Jul-02
A/duck/Guizhou/8.26_ZYLJJ016-O/2018	EPI1820127	HA		Import from public-domain	Bi,Y.; Li,J.; Li,S.; Fu,G.; Jin,T.; Zhang,C.; Yang,Y.; Ma,Z.; Tian,W.; Xiao,S.; Li,L.; Yin,R.; Zhang,Y.; Wang,L.; Qin,Y.; Yao,Z.; Meng,F.; Hu,D.; Li,D.; Wong,G.; Liu,F.; Lv,N.; Fu,L.; Peng,Y.; Ma,J.; Sharshov,K.; Shestopalov,A.; Gulyaeva,M.; Gao,G.F.; Chen,J.; Shi,Y.; Liu,W.J.; Chu,D.; Huang,Y.; Liu,Y.; Liu,L.; Chen,Q.; Shi,W.	China	2018-Aug-26
A/duck/Guizhou/7.27_ZYLJJ017-O/2018	EPI1820121	HA		Import from public-domain	Bi,Y.; Li,J.; Li,S.; Fu,G.; Jin,T.; Zhang,C.; Yang,Y.; Ma,Z.; Tian,W.; Xiao,S.; Li,L.; Yin,R.; Zhang,Y.; Wang,L.; Qin,Y.; Yao,Z.; Meng,F.; Hu,D.; Li,D.; Wong,G.; Liu,F.; Lv,N.; Fu,L.; Peng,Y.; Ma,J.; Sharshov,K.; Shestopalov,A.; Gulyaeva,M.; Gao,G.F.; Chen,J.; Shi,Y.; Liu,W.J.; Chu,D.; Huang,Y.; Liu,Y.; Liu,L.; Chen,Q.; Shi,W.	China	2018-Jul-27
A/duck/Hunan/11.30_YYGK75E3-OC/2017	EPI1820036	HA		Import from public-domain	Bi,Y.; Li,J.; Li,S.; Fu,G.; Jin,T.; Zhang,C.; Yang,Y.; Ma,Z.; Tian,W.; Xiao,S.; Li,L.; Yin,R.; Zhang,Y.; Wang,L.; Qin,Y.; Yao,Z.; Meng,F.; Hu,D.; Li,D.; Wong,G.; Liu,F.; Lv,N.; Fu,L.; Peng,Y.; Ma,J.; Sharshov,K.; Shestopalov,A.; Gulyaeva,M.; Gao,G.F.; Chen,J.; Shi,Y.; Liu,W.J.; Chu,D.; Huang,Y.; Liu,Y.; Liu,L.; Chen,Q.; Shi,W.	China	2017-Nov-03
A/duck/Jiangxi/11.29_NCNP39D3-OC/2017	EPI1819990	HA		Import from public-domain	Bi,Y.; Li,J.; Li,S.; Fu,G.; Jin,T.; Zhang,C.; Yang,Y.; Ma,Z.; Tian,W.; Xiao,S.; Li,L.; Yin,R.; Zhang,Y.; Wang,L.; Qin,Y.; Yao,Z.; Meng,F.; Hu,D.; Li,D.; Wong,G.; Liu,F.; Lv,N.; Fu,L.; Peng,Y.; Ma,J.; Sharshov,K.; Shestopalov,A.; Gulyaeva,M.; Gao,G.F.; Chen,J.; Shi,Y.; Liu,W.J.; Chu,D.; Huang,Y.; Liu,Y.; Liu,L.; Chen,Q.; Shi,W.	China	2017-Nov-29
A/duck/Hunan/03.07_YYGK25L3-OC/2018	EPI1819969	HA		Import from public-domain	Bi,Y.; Li,J.; Li,S.; Fu,G.; Jin,T.; Zhang,C.; Yang,Y.; Ma,Z.; Tian,W.; Xiao,S.; Li,L.; Yin,R.; Zhang,Y.; Wang,L.; Qin,Y.; Yao,Z.; Meng,F.; Hu,D.; Li,D.; Wong,G.; Liu,F.; Lv,N.; Fu,L.; Peng,Y.; Ma,J.; Sharshov,K.; Shestopalov,A.; Gulyaeva,M.; Gao,G.F.; Chen,J.; Shi,Y.; Liu,W.J.; Chu,D.; Huang,Y.; Liu,Y.; Liu,L.; Chen,Q.; Shi,W.	China	2018-Mar-07
A/duck/Jiangxi/11.29_NCNP22D3-OC/2017	EPI1819963	HA		Import from public-domain	Bi,Y.; Li,J.; Li,S.; Fu,G.; Jin,T.; Zhang,C.; Yang,Y.; Ma,Z.; Tian,W.; Xiao,S.; Li,L.; Yin,R.; Zhang,Y.; Wang,L.; Qin,Y.; Yao,Z.; Meng,F.; Hu,D.; Li,D.; Wong,G.; Liu,F.; Lv,N.; Fu,L.; Peng,Y.; Ma,J.; Sharshov,K.; Shestopalov,A.; Gulyaeva,M.; Gao,G.F.; Chen,J.; Shi,Y.; Liu,W.J.; Chu,D.; Huang,Y.; Liu,Y.; Liu,L.; Chen,Q.; Shi,W.	China	2017-Nov-29
A/duck/China/0938/2017	EPI1776451	HA		Import from public-domain	Ge,Z.; Cai,T.; Gu,M.; Liu,X.	China	2017-Sep-22
A/duck/China/0936/2017	EPI1776431	HA		Import from public-domain	Ge,Z.; Cai,T.; Gu,M.; Liu,X.	China	2017-Sep-22
A/duck/Zhejiang/S4854/2021(H5N6)	EPI1997226	HA	Harbin Veterinary Research Institute (CAAS)	Harbin Veterinary Research Institute (CAAS)	Pengfei Cui, Congcong Wang	China	2021-Dec-03
A/duck/Yunnan/S4318/2021(H5N6)	EPI1997218	HA	Harbin Veterinary Research Institute (CAAS)	Harbin Veterinary Research Institute (CAAS)	Pengfei Cui, Congcong Wang	China	2021-Nov-02
A/duck/Hunan/S40268/2021(H5N6)	EPI1997210	HA	Harbin Veterinary Research Institute (CAAS)	Harbin Veterinary Research Institute (CAAS)	Pengfei Cui, Congcong Wang	China	2021-Dec-01
A/duck/Hunan/S40199/2021(H5N6)	EPI1997202	HA	Harbin Veterinary Research Institute (CAAS)	Harbin Veterinary Research Institute (CAAS)	Pengfei Cui, Congcong Wang	China	2021-Dec-01
A/duck/Guizhou/S4702/2021(H5N6)	EPI1997194	HA	Harbin Veterinary Research Institute (CAAS)	Harbin Veterinary Research Institute (CAAS)	Pengfei Cui, Congcong Wang	China	2021-Dec-02
A/duck/Guangxi/S31116/2021(H5N6)	EPI1997186	HA	Harbin Veterinary Research Institute (CAAS)	Harbin Veterinary Research Institute (CAAS)	Pengfei Cui, Congcong Wang	China	2021-Oct-18
A/duck/Guangxi/S30428/2021(H5N6)	EPI1997178	HA	Harbin Veterinary Research Institute (CAAS)	Harbin Veterinary Research Institute (CAAS)	Pengfei Cui, Congcong Wang	China	2021-Oct-19
A/Muscovy duck/China/FJFZ21/H5N6/2020	EPI1841913	HA	Institute of animal husbandry and veterinary medicine, Fujian Academy of Agricultural Sciences	Fujian Agriculture and Forestry University		China	2020-Aug-12
A/mink/Northern China/F0130m/2018(H5N6)	EPI1973702	HA		Import from public-domain	Pu,J.; Sun,Y.; Liu,J.; Wang,Z.; Yan,S.; Qin,Z.; Li,F.; Qu,R.; Sun,H.; Wang,M.	China	2018-Jan-30
A/mink/Eastern China/571/2018	EPI1772171	HA		Import from public-domain	Liu,J.	China	2018-Jun-13
A/mink/Eastern China/0824/2018	EPI1772155	HA		Import from public-domain	Liu,J.	China	2018-Aug-24
A/mink/Eastern China/528/2018	EPI1772147	HA		Import from public-domain	Liu,J.	China	2018-Jun-06
A/mink/Eastern China/149/2018	EPI1772139	HA		Import from public-domain	Liu,J.	China	2018-Feb-22
A/mink/Northern China/110/2018	EPI1772131	HA		Import from public-domain	Liu,J.	China	2018-Jan-26
A/mink/Eastern China/032/2018	EPI1772123	HA		Import from public-domain	Liu,J.	China	2018-Jan-10
A/mink/Eastern China/006/2018	EPI1772115	HA		Import from public-domain	Liu,J.	China	2018-Jan-03
A/chicken/chongqing/H1/2021	EPI1937515	HA	China Animal Health and Epidemiology Center (CAHEC)	China Animal Health and Epidemiology Center (CAHEC)		China	2021-Jun-10
A/Chicken/Yangzhou/f14/2018	EPI1394243	HA	Jiangsu Provincial Center for Disease Control and Prevention	Jiangsu Provincial Center for Disease Control & Prevention		China	2018-Nov-14
A/Chicken/Yangzhou/f9/2018	EPI1394218	HA	Jiangsu Provincial Center for Disease Control and Prevention	Jiangsu Provincial Center for Disease Control & Prevention		China	2018-Nov-14
A/Chicken/Yangzhou/f6/2018	EPI1394202	HA	Jiangsu Provincial Center for Disease Control and Prevention	Jiangsu Provincial Center for Disease Control & Prevention		China	2018-Nov-14
A/Chicken/Suzhou/j1/2019	EPI1426910	HA	Jiangsu Provincial Center for Disease Control and Prevention	Jiangsu Provincial Center for Disease Control & Prevention	Xian, Qi; Huiyan,Yu	China	2019-Feb-12
A/Chicken/Suzhou/j6/2019	EPI1429237	HA	Jiangsu Provincial Center for Disease Control & Prevention	Jiangsu Provincial Center for Disease Control & Prevention	xian, qi;huiyan,yu	China	2019-Feb-12
A/Chicken/Suzhou/j5/2019	EPI1429229	HA	Jiangsu Provincial Center for Disease Control & Prevention	Jiangsu Provincial Center for Disease Control & Prevention		China	2019-Feb-12
A/Chicken/Xuzhou/470/2017	EPI1258049	HA		Jiangsu Provincial Center for Disease Control & Prevention		China	2017-Dec-20
A/pigeon/Fujian/1.17_FZHX0104-O/2017	EPI1836831	HA		Import from public-domain	Bi,Y.; Li,J.; Li,S.; Fu,G.; Jin,T.; Zhang,C.; Yang,Y.; Ma,Z.; Tian,W.; Xiao,S.; Li,L.; Yin,R.; Zhang,Y.; Wang,L.; Qin,Y.; Yao,Z.; Meng,F.; Hu,D.; Li,D.; Wong,G.; Liu,F.; Lv,N.; Fu,L.; Peng,Y.; Ma,J.; Sharshov,K.; Shestopalov,A.; Gulyaeva,M.; Gao,G.F.; Chen,J.; Shi,Y.; Liu,W.J.; Chu,D.; Huang,Y.; Liu,Y.; Liu,L.; Chen,Q.; Shi,W.	China	2017-Jan-17
A/pigeon/Hainan/1.14_HKPL006-C/2018	EPI1820161	HA		Import from public-domain	Bi,Y.; Li,J.; Li,S.; Fu,G.; Jin,T.; Zhang,C.; Yang,Y.; Ma,Z.; Tian,W.; Xiao,S.; Li,L.; Yin,R.; Zhang,Y.; Wang,L.; Qin,Y.; Yao,Z.; Meng,F.; Hu,D.; Li,D.; Wong,G.; Liu,F.; Lv,N.; Fu,L.; Peng,Y.; Ma,J.; Sharshov,K.; Shestopalov,A.; Gulyaeva,M.; Gao,G.F.; Chen,J.; Shi,Y.; Liu,W.J.; Chu,D.; Huang,Y.; Liu,Y.; Liu,L.; Chen,Q.; Shi,W.	China	2018-Jan-14
We gratefully acknowledge the authors, originating and submitting laboratories of the sequences from GISAID’s EpiFlu™ Database on which this research is based. All submitters of data may be contacted directly via www.gisaid.org
