# Supplementary material for: Phylogenetic and Phylogeographic Analysis of the Highly Pathogenic H5N6 Avian Influenza Virus in China
Source: Viruses. 2022 Aug 11;14(8):1752. doi: 10.3390/v14081752 (PMC9415468; doi:10.3390/v14081752)
Supplement: Supplementary file 1 [file viruses-14-01752-s001.zip › Table S2.xlsx]

## Sheet: Sheet1
Supplementary Table S2. Detailed information for full-genome of H5N6 viruses analyzed in this study*															HA‡															NA‡	PB2‡							PB1‡	NP‡		M1‡	M2‡		NS1‡			NS2‡		M2‡
															324‒333		130‒loop						190‒helix					220‒loop		deletion
Strainsa	Subtype	Country	Host	Collection_date	Isolation_ID	PB2	PB1	PA	HA	NP	NA	M	NS	Genotype	Cleavage site b	94	126	129	133	141	151	152	183	185	188	189	192	218	223	58‒68	64	318	355	627	661	667	701	317	136	319	15	16	55	103	106	189	56	31	31
A/duck/China/0938/2017	H5N6	China	Duck	2017-09-22	EPI_ISL_503027	H5N1	H5N6	H5N1	2.3.4.4b	H5N1	Eurasian	H5N1	H5N1	2.3.4.4bG1	RERRRKR↓GLF	N	E	L	A	S	I	K	D	A	T	S	Q	K	S	Yes	M	R	R	E	A	V	D	M	L	N	V	E	L	F	M	D	H	M	S
A/goose/Xinjiang/11/29/WLMQXL001/O2017	H5N6	China	Spoonbill	2017-11-29	EPI_ISL_707660	H5N8	H5N8	H5N8	2.3.4.4b	H5N8	Eurasian	H5N8	H5N8	2.3.4.4bG2	KEKRRKR↓GLF	S	E	L	A	P	I	K	N	E	T	N	K	Q	R	Yes	M	R	R	E	A	I	D	M	L	N	I	E	L	F	M	D	H	M	S
A/Spoonbill/HK/17259/2017	H5N6	China	Duck	2017-12-22	EPI_ISL_885145	H5N8	H5N8	H5N8	2.3.4.4b	H5N8	Eurasian	H5N8	H5N8	2.3.4.4bG2	RERRRKR↓GLF	S	E	L	A	P	I	K	N	E	T	N	K	Q	R	Yes	M	R	R	E	S	V	D	M	L	N	V	E	L	F	M	D	H	M	S
A/duck/Hunan/11/30/YYGK75E3/OC/2017	H5N6	China	Environment	2017-11-03	EPI_ISL_696740	H5N8	H5N8	H5N8	2.3.4.4b	H5N1	Eurasian	H5N8	H5N8	2.3.4.4bG2	RERRRKR↓GLF	S	E	L	A	P	I	K	N	E	T	N	K	Q	R	Yes	M	R	R	E	A	I	D	M	L	N	V	E	L	F	M	D	H	M	S
A/Environment/Fujiansanyuan/08/2017	H5N6	China	Mink	2017-12-26	EPI_ISL_333629	H5N8	H5N8	Other subtypes	2.3.4.4b	H5N1	Eurasian	H5N8	H5N8	2.3.4.4bG3	RERRRKR↓GLF	S	E	L	A	P	I	K	N	E	T	N	K	Q	R	Yes	M	R	R	E	A	I	D	M	L	N	V	E	L	F	M	D	H	M	N
A/mink/NorthernChina/110/2018	H5N6	China	Duck	2018-01-26	EPI_ISL_502203	H5N8	H5N8	H7N9/H9N2	2.3.4.4b	H5N1	Eurasian	H5N8	H5N8	2.3.4.4bG4	RERRRKR↓GLF	S	E	L	A	P	I	K	N	E	T	N	K	Q	R	Yes	M	R	R	E	A	I	D	M	L	N	V	E	L	F	M	D	H	M	S
A/duck/Sichuan/SS1/2021	H5N6	China	Duck	2021-09-21	EPI_ISL_12845159	H3N2	H3N2	H3N2	2.3.4.4b	H5N1	Eurasian	H5N8	H3N2	2.3.4.4bG5	REKRRKR↓GLF	S	E	L	A	P	I	K	N	E	I	N	K	Q	R	Yes	M	R	R	E	A	V	D	M	L	N	V	E	L	F	M	D	H	M	N
A/duck/Yunnan/S4318/2021	H5N6	China	Duck	2021-11-02	EPI_ISL_11208198	H3N2	H3N2	H3N2	2.3.4.4b	H5N1	Eurasian	H5N8	H3N2	2.3.4.4bG5	REKRRKR↓GLF	S	E	L	A	P	I	K	N	E	I	N	K	Q	R	Yes	M	R	R	E	A	V	D	M	L	N	V	E	L	F	M	D	H	M	S
A/chicken/chongqing/H1/2021	H5N6	China	Chicken	2021-06-10	EPI_ISL_6914131	H3N2	H3N2	H3N2	2.3.4.4b	H5N1	Eurasian	H5N8	H3N2	2.3.4.4bG5	REKRRKR↓GLF	S	E	L	A	P	I	K	N	E	I	N	K	Q	R	Yes	M	R	R	E	A	V	D	M	L	N	V	E	L	F	M	D	H	M	S
A/Sichuan/06681/2021	H5N6	China	Human	2021-07-03	EPI_ISL_3090099	H3N2	H3N2	H3N2	2.3.4.4b	H5N1	Eurasian	H5N8	H3N2	2.3.4.4bG5	REKRRKR↓GLF	S	E	L	A	P	I	K	N	E	I	N	K	Q	R	Yes	M	R	R	E	A	V	D	M	L	N	V	E	L	V	M	D	H	M	S
A/goose/Guangdong/S4751/2021	H5N6	China	Goose	2021-12-08	EPI_ISL_11208200	H5N8	H3N2	H5N8	2.3.4.4b	H5N8	Eurasian	H5N8	H3N2	2.3.4.4bG6	REKRRKR↓GLF	S	E	L	A	P	I	K	N	E	I	N	K	Q	R	Yes	M	R	R	E	A	V	D	M	L	N	V	E	L	F	M	D	H	M	S
A/duck/Hunan/S40199/2021	H5N6	China	Chicken	2021-12-01	EPI_ISL_11208196	H5N8	H3N2	H5N8	2.3.4.4b	H5N8	Eurasian	H5N8	H3N2	2.3.4.4bG6	RERRRKR↓GLF	S	E	L	A	P	I	K	N	E	I	N	K	Q	R	Yes	M	R	R	E	S	V	D	V	L	N	V	E	L	F	M	D	H	M	S
A/Chicken/Hangzhou/E1149/2021	H5N6	China	Duck	2021-12-23	EPI_ISL_8518268	H3N2	H5N1	H5N1	2.3.4.4b	H5N1	Eurasian	H5N8	H5N1	2.3.4.4bG7	REKRRKR↓GLF	S	E	L	A	P	I	K	N	E	I	N	K	Q	R	Yes	M	R	R	E	A	V	D	M	L	N	V	E	L	F	M	D	H	M	S
A/duck/Guangxi/S30428/2021	H5N6	China	Duck	2021-10-19	EPI_ISL_11208193	H5N8	H5N8	H5N8	2.3.4.4b	H5N8	Eurasian	H5N8	H5N1	2.3.4.4bG8	REKRRKR↓GLF	S	E	L	A	P	I	K	N	E	T	N	K	Q	R	Yes	M	R	R	E	A	V	D	M	L	N	V	E	L	F	M	D	H	M	S
A/duck/Guangxi/S31116/2021	H5N6	China	Duck	2021-10-18	EPI_ISL_11208194	H5N8	H5N8	H5N8	2.3.4.4b	H5N8	Eurasian	H5N8	H5N1	2.3.4.4bG8	REKRRKR↓GLF	S	E	L	A	P	I	K	N	E	I	N	K	Q	R	Yes	M	R	R	E	A	V	D	I	L	N	V	E	L	F	M	D	H	M	S
A/Environment/Hangzhou/E1147/2021	H5N6	China	Environment	2021-12-23	EPI_ISL_8517996	H3N2	H5N8	H7N9/H9N2	2.3.4.4b	H5N1	Eurasian	H5N8	H5N1	2.3.4.4bG9	REKRRKR↓GLF	S	E	L	A	P	I	K	N	E	I	N	K	Q	R	Yes	M	R	R	E	A	V	D	M	L	N	V	E	L	F	M	D	H	M	S
A/Environment/Hangzhou/E1150/2021	H5N6	China	Environment	2021-12-23	EPI_ISL_8517997	H3N2	H5N8	H7N9/H9N2	2.3.4.4b	H5N1	Eurasian	H5N8	H5N1	2.3.4.4bG9	REKRRKR↓GLF	S	E	L	A	P	I	K	N	E	I	N	K	Q	R	Yes	M	R	R	E	A	I	D	M	L	N	V	E	L	F	M	D	H	M	S
A/Environment/Hangzhou/E1151/2021	H5N6	China	Environment	2021-12-23	EPI_ISL_8517998	H3N2	H5N8	H7N9/H9N2	2.3.4.4b	H5N1	Eurasian	H5N8	H5N1	2.3.4.4bG9	REKRRKR↓GLF	S	E	L	A	P	I	K	N	E	I	N	K	Q	R	Yes	M	R	R	E	A	I	D	M	L	N	V	E	L	F	M	D	H	M	S
A/Environment/Hangzhou/E1153/2021	H5N6	China	Environment	2021-12-23	EPI_ISL_8517999	H3N2	H5N8	H7N9/H9N2	2.3.4.4b	H5N1	Eurasian	H5N8	H5N1	2.3.4.4bG9	REKRRKR↓GLF	S	E	L	A	P	I	K	N	E	I	N	K	Q	R	Yes	M	R	R	E	A	V	D	M	L	N	V	E	L	F	M	D	H	M	S
A/Environment/Hangzhou/E1154/2021	H5N6	China	Environment	2021-12-23	EPI_ISL_8518000	H3N2	H5N8	H7N9/H9N2	2.3.4.4b	H5N1	Eurasian	H5N8	H5N1	2.3.4.4bG9	REKRRKR↓GLF	S	E	L	A	P	I	K	N	E	I	N	K	Q	R	Yes	M	R	R	E	A	V	D	M	L	N	V	E	L	F	M	D	H	M	S
A/Hunan/09285/2021	H5N6	China	Human	2021-08-07	EPI_ISL_4568642	H3N2	H3N2	H7N9/H9N2	2.3.4.4b	H5N1	Eurasian	H5N8	H5N1	2.3.4.4bG10	REKRRKR↓GLF	S	E	L	A	P	I	K	N	E	I	N	K	Q	R	Yes	M	R	R	E	A	V	D	M	L	N	V	E	L	F	M	D	H	M	S
A/Hunan/10117/2021	H5N6	China	Human	2021-09-11	EPI_ISL_5159426	H3N2	H3N2	H7N9/H9N2	2.3.4.4b	H5N1	Eurasian	H5N8	H5N1	2.3.4.4bG10	REKRRKR↓GLF	S	E	L	A	P	I	K	N	E	I	N	K	Q	R	Yes	M	R	R	E	A	V	D	M	L	N	V	E	L	F	M	D	H	M	S
A/Hunan/09911/2021	H5N6	China	Human	2021-09-03	EPI_ISL_4568643	H3N2	H3N2	H7N9/H9N2	2.3.4.4b	H5N1	Eurasian	H5N8	H5N1	2.3.4.4bG10	REKRRKR↓GLF	S	E	L	A	P	I	K	N	E	I	N	K	Q	R	Yes	M	R	R	E	A	V	D	M	L	N	V	E	L	F	M	D	H	M	S
A/GX/guilin/11151/2021	H5N6	China	Human	2021-07-14	EPI_ISL_3770740	H3N2	H3N2	H7N9/H9N2	2.3.4.4b	H5N1	Eurasian	H5N8	H5N1	2.3.4.4bG10	REKRRKR↓GLF	S	E	L	A	P	I	K	N	E	I	N	K	Q	R	Yes	M	R	R	E	A	I	D	M	L	N	V	E	L	F	M	D	H	M	S
A/Hangzhou/01/2021	H5N6	China	Human	2021-12-22	EPI_ISL_7983813	H3N2	H3N2	H7N9/H9N2	2.3.4.4b	H5N1	Eurasian	H5N8	H5N1	2.3.4.4bG10	RERRRKR↓GLF	S	E	L	A	P	I	K	N	E	I	N	K	Q	R	Yes	M	R	R	E	A	V	D	M	L	N	V	E	L	F	M	D	H	M	S
A/duck/Guizhou/S4702/2021	H5N6	China	Duck	2021-12-02	EPI_ISL_11208195	H3N2	H3N2	H7N9/H9N2	2.3.4.4b	H5N1	Eurasian	H5N8	H5N1	2.3.4.4bG10	REKRRKR↓GLF	S	E	L	A	P	I	K	N	E	I	N	K	Q	R	Yes	M	R	R	E	A	V	D	M	L	N	V	E	L	F	M	D	H	M	S
A/duck/Hunan/S40268/2021	H5N6	China	Duck	2021-12-01	EPI_ISL_11208197	H3N2	H3N2	H7N9/H9N2	2.3.4.4b	H5N1	Eurasian	H5N8	H5N1	2.3.4.4bG10	REKRRKR↓GLF	S	E	L	A	P	I	K	N	E	I	N	K	Q	R	Yes	M	R	R	E	A	V	D	M	L	N	V	E	L	F	M	D	H	M	S
A/goose/Guangxi/GG1/2022	H5N6	China	Goose	2022-04-20	EPI_ISL_12845161	H3N2	H3N2	H7N9/H9N2	2.3.4.4b	H5N1	Eurasian	H5N8	H5N1	2.3.4.4bG10	REKRRKR↓GLF	N	E	L	A	P	I	K	N	E	I	N	K	Q	R	Yes	M	R	R	E	A	I	D	M	L	N	V	E	L	F	M	D	H	M	S
A/duck/Zhejiang/S4854/2021	H5N6	China	Duck	2021-12-03	EPI_ISL_11208199	H3N2	H3N2	H7N9/H9N2	2.3.4.4b	H5N1	Eurasian	H5N8	H5N1	2.3.4.4bG10	RERRRKR↓GLF	S	E	L	A	P	I	K	N	E	T	D	K	Q	R	Yes	M	R	R	E	A	V	D	M	L	N	V	E	L	F	M	D	H	M	S
A/chicken/Shanxi/04/28/TGRL001/O/2018	H5N6	China	Chicken	2018-04-28	EPI_ISL_696629	H6	H5N6	H5N1	2.3.4.4c	H5N1	Eurasian	H5N1	H5N1	2.3.4.4cG1	RERRRKR↓GLF	T	E	L	A	S	I	K	N	A	T	N	K	Q	S	Yes	M	R	R	E	S	V	D	M	L	N	I	E	L	F	M	D	H	M	S
A/chicken/Shanxi/04/28/TGRL024/O/2018	H5N6	China	Chicken	2018-04-28	EPI_ISL_696630	H6	H5N6	H5N1	2.3.4.4c	H5N1	Eurasian	H5N1	H5N1	2.3.4.4cG1	RERRRKR↓GLF	T	E	L	A	S	I	K	N	A	T	N	K	Q	S	Yes	M	R	R	E	S	V	D	M	L	N	I	E	L	F	M	D	H	M	S
A/pigeon/Fujian/1/17/FZHX0104/O/2017	H5N6	China	Pigeon	2017-01-17	EPI_ISL_707676	H6	H5N6	H5N1	2.3.4.4e	H5N1	Eurasian	H5N6	Other subtypes	2.3.4.4eG1	RERRRKR↓GLF	N	E	NA	A	P	T	K	N	A	T	N	K	Q	Q	Yes	M	R	R	E	S	V	D	M	L	N	I	E	L	F	M	D	H	M	S
A/goose/Henan/01/01/LYGL001/O/2017	H5N6	China	Goose	2017-01-01	EPI_ISL_707659	H6	H5N6	H5N1	2.3.4.4e	H5N1	Eurasian	H5N6	H5N1	2.3.4.4eG2	RERRRKR↓GLF	N	E	NA	A	P	T	K	N	A	T	N	K	Q	Q	Yes	M	R	R	E	S	V	D	M	L	N	I	E	L	F	M	D	H	M	S
A/duck/Fujian/1/17/FZHX0123/C/2017	H5N6	China	Duck	2017-01-17	EPI_ISL_707384	H6	H5N6	H5N1	2.3.4.4e	H5N1	Eurasian	H5N6	H5N1	2.3.4.4eG2	RERRRKR↓GLF	N	E	NA	A	P	T	K	N	A	T	N	K	Q	Q	Yes	M	R	R	E	S	V	D	M	L	N	I	E	L	F	M	D	H	M	N
A/Beangoose/Hubei/CH/I225/2017	H5N6	China	Beangoose	2017-02-24	EPI_ISL_266825	H6	H5N1	H5N1	2.3.4.4e	H5N1	Eurasian	H5N1	H5N1	2.3.4.4eG3	RERRRKR↓GLF	N	NA	L	A	P	T	K	N	A	T	N	K	Q	R	Yes	M	R	R	E	S	I	D	M	L	N	I	E	L	F	M	D	H	M	S
A/Beangoose/Hubei/CH/i336/2017	H5N6	China	Beangoose	2017-03-06	EPI_ISL_266823	H6	H5N1	H5N1	2.3.4.4e	H5N1	Eurasian	H5N1	H5N1	2.3.4.4eG3	RERRRKR↓GLF	N	E	L	A	P	T	K	N	A	T	N	K	Q	R	Yes	M	R	R	E	S	I	D	M	L	N	I	E	L	F	M	D	H	M	S
A/chicken/Fujian/11/23/FZHX0007/O/2017	H5N6	China	Chicken	2017-11-23	EPI_ISL_699204	H6	H7N9/H9N2	H5N1	2.3.4.4e	H5N1	Eurasian	H7N9/H9N2	H5N1	2.3.4.4eG4	RERRRKR↓GLF	N	E	S	A	P	T	K	N	E	T	K	K	Q	Q	Yes	M	R	R	E	S	V	D	M	L	N	I	E	L	F	M	D	H	M	N
A/goose/Fujian/10/26/FZHX0004/O/2017	H5N6	China	Goose	2017-10-26	EPI_ISL_707646	H6	H5N6	H5N1	2.3.4.4e	H5N1	Eurasian	H5N1	H5N1	2.3.4.4eG5	RERRRKR↓GLF	N	E	NA	A	P	T	K	N	E	T	K	K	Q	Q	Yes	M	R	R	E	S	V	D	M	L	N	I	E	L	F	M	D	H	M	S
A/goose/Fujian/10/26/FZHX0006/C/2017	H5N6	China	Goose	2017-10-26	EPI_ISL_707647	H6	H5N6	H5N1	2.3.4.4e	H5N1	Eurasian	H5N1	H5N1	2.3.4.4eG5	RERRRKR↓GLF	N	E	NA	A	P	T	K	N	E	T	K	K	Q	Q	Yes	M	R	R	E	S	V	D	M	L	N	I	E	L	F	M	D	H	M	N
A/goose/Fujian/10/26/FZHX0002/C/2017	H5N6	China	Goose	2017-10-26	EPI_ISL_707643	H6	H5N6	H5N1	2.3.4.4e	H5N1	Eurasian	H5N1	H5N1	2.3.4.4eG5	RERRRKR↓GLF	N	E	NA	A	P	T	K	N	E	T	K	K	Q	Q	Yes	M	R	R	E	S	V	D	M	L	N	I	E	L	F	M	D	H	M	S
A/goose/Fujian/10/26/FZHX0002/O/2017	H5N6	China	Goose	2017-10-26	EPI_ISL_707644	H6	H5N6	H5N1	2.3.4.4e	H5N1	Eurasian	H5N1	H5N1	2.3.4.4eG5	RERRRKR↓GLF	N	E	NA	A	P	T	K	N	E	T	K	K	Q	Q	Yes	M	R	R	E	S	V	D	M	L	N	I	E	L	F	M	D	H	M	S
A/duck/Fujian/11/23/FZHX0009/C/2017	H5N6	China	Duck	2017-11-23	EPI_ISL_707417	H6	H5N6	H5N1	2.3.4.4e	H5N1	Eurasian	H5N1	H5N1	2.3.4.4eG5	RERRRKR↓GLF	N	E	NA	A	P	T	K	N	E	T	K	K	Q	Q	Yes	M	R	R	E	S	V	D	M	L	N	I	E	L	L	M	D	H	M	S
A/chicken/Fujian/11/23/FZHX0015/O/2017	H5N6	China	Chicken	2017-11-23	EPI_ISL_697144	H6	H5N6	H5N1	2.3.4.4e	H5N1	Eurasian	H5N1	H5N1	2.3.4.4eG5	RERRRKR↓GLF	N	E	NA	A	P	T	K	N	E	T	K	K	Q	Q	Yes	M	R	R	E	S	V	D	M	L	N	I	E	L	F	M	D	H	M	S
A/duck/Hunan/11/30/YYGK59E3/O/C/2017	H5N6	China	Duck	2017-11-03	EPI_ISL_707500	H6	H5N6	H5N1	2.3.4.4e	H5N1	Eurasian	H5N1	H5N1	2.3.4.4eG5	RERRRKR↓GLF	N	E	NA	A	P	T	K	N	E	T	K	K	K	Q	Yes	M	R	R	E	S	V	D	M	L	N	I	E	L	F	M	D	H	M	S
A/duck/Fujian/10/26/FZHX0002/O/2017	H5N6	China	Duck	2017-10-26	EPI_ISL_707414	H6	H5N6	H5N1	2.3.4.4e	H5N1	Eurasian	H5N1	H5N1	2.3.4.4eG5	RERRRKR↓GLF	N	E	S	A	P	T	K	N	E	T	N	K	Q	R	Yes	M	R	R	E	S	V	D	M	L	N	I	E	L	F	M	D	H	M	S
A/duck/Fujian/10/26/FZHX0010/O/2017	H5N6	China	Duck	2017-10-26	EPI_ISL_707415	H6	H5N6	H5N1	2.3.4.4e	H5N1	Eurasian	H5N1	H5N1	2.3.4.4eG5	RERRRKR↓GLF	N	E	NA	A	P	T	K	N	E	A	K	K	Q	Q	Yes	M	R	R	E	S	V	D	M	L	N	I	E	L	F	M	D	H	M	S
A/duck/Jiangxi/11/29/NCNP22D3/OC/2017	H5N6	China	Duck	2017-11-29	EPI_ISL_696686	H6	H5N6	H5N1	2.3.4.4e	H5N1	Eurasian	H5N1	H5N1	2.3.4.4eG5	RERRRKR↓GLF	N	E	L	A	P	T	K	N	A	T	N	K	Q	R	Yes	M	R	R	E	S	V	D	M	L	N	I	E	L	F	M	D	H	M	S
A/duck/Fujian/11/23/FZHX0014/C/2017	H5N6	China	Duck	2017-11-23	EPI_ISL_707418	H6	H5N6	H5N1	2.3.4.4e	H5N1	Eurasian	H5N1	H5N1	2.3.4.4eG5	RERRRKR↓GLF	N	E	S	A	P	T	K	N	E	T	K	K	Q	Q	Yes	M	R	R	E	S	V	D	M	L	N	I	E	L	F	M	D	H	M	S
A/duck/Fujian/11/23/FZHX0015/C/2017	H5N6	China	Duck	2017-11-23	EPI_ISL_707419	H6	H5N6	H5N1	2.3.4.4e	H5N1	Eurasian	H5N1	H5N1	2.3.4.4eG5	RERRRKR↓GLF	N	E	S	A	P	T	K	N	E	T	K	K	Q	Q	Yes	M	R	R	E	S	V	D	M	L	N	I	E	L	F	M	D	H	M	S
A/goose/Fujian/10/26/FZHX0006/O/2017	H5N6	China	Goose	2017-10-26	EPI_ISL_707648	H6	H5N6	H5N1	2.3.4.4e	H5N1	Eurasian	H5N1	H5N1	2.3.4.4eG5	RERRRKR↓GLF	N	E	NA	A	P	T	K	N	E	T	K	K	Q	Q	Yes	M	R	R	E	S	V	D	M	L	N	I	E	L	F	M	D	H	M	S
A/goose/Fujian/10/26/FZHX0007/O/2017	H5N6	China	Goose	2017-10-26	EPI_ISL_707649	H6	H5N6	H5N1	2.3.4.4e	H5N1	Eurasian	H5N1	H5N1	2.3.4.4eG5	RERRRKR↓GLF	N	E	S	A	P	T	K	N	E	T	K	K	Q	Q	Yes	M	R	R	E	S	V	D	M	L	N	I	E	L	F	M	D	H	M	S
A/goose/Fujian/10/26/FZHX0008/C/2017	H5N6	China	Goose	2017-10-26	EPI_ISL_707650	H6	H5N6	H5N1	2.3.4.4e	H5N1	Eurasian	H5N1	H5N1	2.3.4.4eG5	RERRRKR↓GLF	N	E	NA	A	P	T	K	N	E	T	K	K	Q	Q	Yes	M	R	R	E	S	V	D	M	L	N	I	E	L	F	M	D	H	M	S
A/goose/Fujian/10/26/FZHX0014/O/2017	H5N6	China	Goose	2017-10-26	EPI_ISL_707651	H6	H5N6	H5N1	2.3.4.4e	H5N1	Eurasian	H5N1	H5N1	2.3.4.4eG5	RERRRKR↓GLF	N	E	NA	A	P	T	K	N	E	T	K	K	Q	Q	Yes	M	R	R	E	S	V	D	M	L	N	I	E	L	F	M	D	H	M	S
A/goose/Fujian/11/23/FZHX0008/O/2017	H5N6	China	Goose	2017-11-23	EPI_ISL_697210	H6	H5N6	H5N1	2.3.4.4e	H5N1	Eurasian	H5N1	H5N1	2.3.4.4eG5	RERRRKR↓GLF	N	E	NA	A	P	T	K	N	E	T	K	K	Q	Q	Yes	M	R	R	E	S	V	D	M	L	N	I	E	L	L	I	D	H	M	S
A/goose/Fujian/11/23/FZHX0009/O/2017	H5N6	China	Goose	2017-11-23	EPI_ISL_697211	H6	H5N6	H5N1	2.3.4.4e	H5N1	Eurasian	H5N1	H5N1	2.3.4.4eG5	RERRRKR↓GLF	N	E	S	A	P	T	K	N	E	T	K	K	Q	Q	Yes	M	R	R	E	S	V	D	M	L	N	I	E	L	F	I	D	H	M	S
A/Pavocristatus/China/JS01/2018	H5N6	China	Pavocristatus	2018-01-24	EPI_ISL_370415	H6	H5N6	H5N1	2.3.4.4e	H5N1	Eurasian	H5N1	H5N1	2.3.4.4eG5	RERRRKR↓GLF	N	E	NA	A	P	T	K	N	E	T	K	K	Q	Q	Yes	M	R	R	E	S	V	D	M	L	N	I	E	L	F	M	D	H	M	S
A/Pavocristatus/China/JS02/2018	H5N6	China	Pavocristatus	2018-01-24	EPI_ISL_370414	H6	H5N6	H5N1	2.3.4.4e	H5N1	Eurasian	H5N1	H5N1	2.3.4.4eG5	RERRRKR↓GLF	N	E	NA	A	P	T	K	N	E	T	K	K	Q	Q	Yes	M	R	R	E	S	V	D	M	L	N	I	E	L	F	M	D	H	M	S
A/Pavocristatus/China/K10/2018	H5N6	China	Pavocristatus	2018-01-24	EPI_ISL_370416	H6	H5N6	H5N1	2.3.4.4e	H5N1	Eurasian	H5N1	H5N1	2.3.4.4eG5	RERRRKR↓GLF	N	E	NA	A	P	T	K	N	E	T	K	K	Q	Q	Yes	M	R	R	E	S	V	D	M	L	N	I	E	L	F	M	D	H	M	S
A/Greylaggoose/Hunan/1/2017	H5N6	China	Greylaggoose	2017-01-08	EPI_ISL_400492	H6	H5N6	H5N1	2.3.4.4e	H5N1	Eurasian	H5N1	H5N1	2.3.4.4eG5	RERRRKR↓GLF	N	E	NA	A	P	T	K	N	A	T	N	K	Q	Q	Yes	M	R	R	E	S	V	D	M	L	N	I	E	L	F	M	D	H	M	S
A/Quail/Guangxi/GX/2/2017	H5N6	China	Quail	2017-07-15	EPI_ISL_283971	H6	H5N6	H5N1	2.3.4.4e	H5N1	Eurasian	H5N1	H5N1	2.3.4.4eG5	RERRRKR↓GLF	N	E	NA	A	P	T	K	N	A	T	N	K	Q	Q	Yes	M	R	R	E	S	V	D	M	L	N	I	E	L	F	M	D	H	M	S
A/Waterfowl/Guangdong/PO17284158/YJ/2017	H5N6	China	Waterfowl	2017-05-10	EPI_ISL_340855	H6	H5N6	H5N1	2.3.4.4e	H5N1	Eurasian	H5N1	H5N1	2.3.4.4eG5	RERRRKR↓GLF	N	E	NA	A	P	T	K	N	E	T	K	K	Q	Q	Yes	M	R	R	E	S	V	D	M	L	N	I	E	L	F	M	D	H	M	S
A/Env/Guangdong/EN17284259/YJ/2017	H5N6	China	Env	2017-07-12	EPI_ISL_340856	H6	H5N6	H5N1	2.3.4.4e	H5N1	Eurasian	H5N1	H5N1	2.3.4.4eG5	RERRRKR↓GLF	N	E	NA	A	P	T	K	N	E	T	K	K	Q	Q	Yes	M	R	R	E	S	V	D	M	L	N	I	E	L	F	M	D	H	M	S
A/Duck/Guangdong/PO17284260/YJ/2017	H5N6	China	Duck	2017-07-12	EPI_ISL_340857	H6	H5N6	H5N1	2.3.4.4e	H5N1	Eurasian	H5N1	H5N1	2.3.4.4eG5	RERRRKR↓GLF	N	E	NA	A	P	T	K	N	E	T	K	K	Q	Q	Yes	M	R	R	E	S	V	D	M	L	N	I	E	L	F	M	D	H	M	S
A/Env/Guangdong/C17280709/HZH/2017	H5N6	China	Environment	2017-05-02	EPI_ISL_340858	H6	H5N6	H5N1	2.3.4.4e	H5N1	Eurasian	H5N1	H5N1	2.3.4.4eG5	RERRRKR↓GLF	N	E	NA	A	P	T	K	N	E	T	K	K	Q	Q	Yes	M	R	R	E	S	V	D	M	L	N	I	E	L	F	M	D	H	M	S
A/Env/Guangdong/C17285091/QY/2017	H5N6	China	Environment	2017-01-17	EPI_ISL_340854	H6	H5N6	H5N1	2.3.4.4e	H5N1	Eurasian	H5N1	H5N1	2.3.4.4eG5	RERRRKR↓GLF	N	E	NA	A	P	T	K	N	A	T	N	K	Q	Q	Yes	M	R	R	E	S	V	D	M	L	N	I	E	L	F	M	D	H	M	S
A/chicken/Fujian/11/23/FZHX0014/O2017/2017	H5N6	China	Chicken	2017-11-23	EPI_ISL_697143	H6	H5N6	H5N1	2.3.4.4e	H5N1	Eurasian	H5N1	H5N1	2.3.4.4eG5	RERRRKR↓GLF	N	E	S	A	A	T	K	N	E	T	K	K	Q	Q	Yes	M	R	R	E	S	V	D	M	L	N	I	E	L	F	M	D	H	M	S
A/goose/Fujian/10/26/FZHX0004/C/2017/2017	H5N6	China	Goose	2017-10-26	EPI_ISL_707645	H6	H5N6	H5N1	2.3.4.4e	H5N1	Eurasian	H5N1	H5N1	2.3.4.4eG5	RERRRKR↓GLF	N	E	NA	A	P	T	K	N	E	T	N	K	Q	R	Yes	M	R	R	E	S	V	D	M	L	N	I	E	L	F	I	D	H	M	S
A/Ostrich/Guangxi/GX/1/2017/2017	H5N6	China	Ostrich	2017-06-28	EPI_ISL_283970	H6	H5N6	H5N1	2.3.4.4g	H5N1	Eurasian	H5N1	H5N1	2.3.4.4gG1	RERRRKR↓GLF	N	E	L	A	P	I	K	N	A	T	D	K	Q	R	Yes	M	R	R	E	S	V	D	M	L	N	I	E	L	F	M	D	H	M	S
A/duck/Hunan/03/07/YYGK4L3/OC/2018	H5N6	China	Duck	2018-03-07	EPI_ISL_707477	H6	H5N6	H5N1	2.3.4.4g	H5N1	Eurasian	H5N1	H5N1	2.3.4.4gG1	RERRRKR↓GLF	N	E	L	A	P	I	K	N	A	K	D	K	Q	R	Yes	M	R	R	E	S	V	D	M	L	N	I	E	L	F	M	D	H	M	S
A/Anhui/2021/00011/20202	H5N6	China	Human	2020-12-22	EPI_ISL_1081370	H6	H5N1	H5N1	2.3.4.4h	H5N1	Eurasian	H5N6	H5N1	2.3.4.4hG1	RERRRKR↓GLF	N	NA	S	A	A	T	K	S	E	T	D	K	Q	R	Yes	M	R	R	E	S	V	D	M	L	N	I	E	L	F	M	D	H	M	S
A/Chicken/Suzhou/j1/2019/2019.2	H5N6	China	Chicken	2019-02-12	EPI_ISL_353281	H6	H5N1	H5N1	2.3.4.4h	H5N1	Eurasian	H5N6	H5N1	2.3.4.4hG1	RERRRKR↓GLF	N	NA	S	A	A	T	K	S	E	T	N	K	Q	R	Yes	M	R	R	E	S	V	D	M	L	N	I	E	L	F	M	D	H	M	S
A/Chicken/Suzhou/j5/2019/2019.2	H5N6	China	Chicken	2019-02-12	EPI_ISL_353285	H6	H5N1	H5N1	2.3.4.4h	H5N1	Eurasian	H5N6	H5N1	2.3.4.4hG1	RERRRKR↓GLF	N	NA	S	A	A	T	K	S	E	T	N	K	Q	R	Yes	M	R	R	E	S	V	D	M	L	N	I	E	L	F	M	D	H	M	S
A/Chicken/Suzhou/j6/2019/2019.2	H5N6	China	Chicken	2019-02-12	EPI_ISL_353618	H6	H5N1	H5N1	2.3.4.4h	H5N1	Eurasian	H5N6	H5N1	2.3.4.4hG1	RERRRKR↓GLF	N	NA	S	A	A	T	K	S	E	T	N	K	Q	R	Yes	M	R	R	E	S	V	D	M	L	N	I	E	L	F	M	D	H	M	S
A/Chongqing/00013/2021/2021.1	H5N6	China	Human	2021-01-02	EPI_ISL_1081369	H6	H5N1	H5N1	2.3.4.4h	H5N1	Eurasian	H5N6	H5N1	2.3.4.4hG1	RERRRKR↓GLF	N	NA	S	A	A	T	K	S	E	T	V	K	Q	R	Yes	M	R	R	E	S	V	D	M	L	N	I	E	L	F	M	D	H	M	S
A/Duck/Guangdong/PO1707260017/GZH/2017	H5N6	China	Duck	2017-08-02	EPI_ISL_340834	H6	H5N1	H5N1	2.3.4.4h	H5N1	Eurasian	H5N6	H5N1	2.3.4.4hG1	RERRRKR↓GLF	N	NA	S	A	A	T	K	S	E	T	N	K	Q	R	Yes	M	R	R	E	S	V	D	M	L	N	I	E	L	F	M	D	H	M	S
A/Duck/Guangdong/PO17281256/MZH/2017	H5N6	China	Duck	2017-08-21	EPI_ISL_340789	H6	H5N1	H5N1	2.3.4.4h	H5N1	Eurasian	H5N6	H5N1	2.3.4.4hG1	RERRRKR↓GLF	N	NA	S	A	A	T	K	S	E	T	D	K	Q	R	Yes	M	R	R	E	S	V	D	M	L	N	I	E	L	F	M	D	H	M	S
A/Duck/Guangdong/Yangjiang/PO18284009/2018	H5N6	China	Duck	2018-01-09	EPI_ISL_340847	H6	H5N1	H5N1	2.3.4.4h	H5N1	Eurasian	H5N6	H5N1	2.3.4.4hG1	RERRRKR↓GLF	N	NA	S	A	A	T	K	S	E	T	N	K	Q	R	Yes	M	R	R	E	S	V	D	M	L	N	I	E	L	F	M	D	H	M	S
A/Env/Guangdong/C17059521/YF/2017	H5N6	China	Environment	2017-11-14	EPI_ISL_340838	H6	H5N1	H5N1	2.3.4.4h	H5N1	Eurasian	H5N6	H5N1	2.3.4.4hG1	RERRRKR↓GLF	N	NA	S	A	A	T	K	S	E	T	N	K	Q	R	Yes	M	R	R	E	S	V	D	M	L	N	I	E	L	F	M	D	H	M	S
A/Env/Guangdong/C17272335/SHG/2017	H5N6	China	Environment	2017-05-16	EPI_ISL_340853	H6	H5N1	H5N1	2.3.4.4h	H5N1	Eurasian	H5N6	H5N1	2.3.4.4hG1	RERRRKR↓GLF	N	NA	S	A	P	T	K	N	E	T	T	K	Q	C	Yes	M	R	R	E	S	V	D	M	L	N	I	E	L	F	M	D	H	M	S
A/Env/Guangdong/C17272382/SHG/2017	H5N6	China	Environment	2017-11-14	EPI_ISL_340813	H6	H5N1	H5N1	2.3.4.4h	H5N1	Eurasian	H5N6	H5N1	2.3.4.4hG1	RERRRKR↓GLF	N	NA	S	A	A	T	K	S	E	T	D	K	Q	R	Yes	M	R	R	E	S	V	D	M	L	N	I	E	L	F	M	D	H	M	S
A/Env/Guangdong/C172752325/FSH/2017	H5N6	China	Environment	2017-11-27	EPI_ISL_340814	H6	H5N1	H5N1	2.3.4.4h	H5N1	Eurasian	H5N6	H5N1	2.3.4.4hG1	RERRRKR↓GLF	N	NA	S	A	A	T	K	S	E	T	D	K	Q	R	Yes	M	R	R	E	S	V	D	M	L	N	I	E	L	F	M	D	H	M	S
A/Env/Guangdong/C172752326/FSH/2017	H5N6	China	Environment	2017-11-27	EPI_ISL_340815	H6	H5N1	H5N1	2.3.4.4h	H5N1	Eurasian	H5N6	H5N1	2.3.4.4hG1	RERRRKR↓GLF	N	NA	S	A	A	T	K	S	E	T	D	K	Q	R	Yes	M	R	R	E	S	V	D	M	L	N	I	E	L	F	M	D	H	M	S
A/Env/Guangdong/C172752329/FSH/2017	H5N6	China	Environment	2017-11-27	EPI_ISL_340817	H6	H5N1	H5N1	2.3.4.4h	H5N1	Eurasian	H5N6	H5N1	2.3.4.4hG1	RERRRKR↓GLF	N	NA	S	A	A	T	K	S	E	T	N	K	Q	S	Yes	M	R	R	E	S	V	D	M	L	N	I	E	L	F	M	D	H	M	S
A/Env/Guangdong/C172790591/ZHQ/2017	H5N6	China	Environment	2017-05-08	EPI_ISL_340848	H6	H5N1	H5N1	2.3.4.4h	H5N1	Eurasian	H5N6	H5N1	2.3.4.4hG1	RERRRKR↓GLF	N	NA	S	A	A	T	K	S	E	T	N	K	Q	R	Yes	M	R	R	E	S	V	D	M	L	N	I	E	L	F	M	D	H	M	S
A/Env/Guangdong/C172790853/ZHQ/2017	H5N6	China	Environment	2017-10-30	EPI_ISL_340827	H6	H5N1	H5N1	2.3.4.4h	H5N1	Eurasian	H5N6	H5N1	2.3.4.4hG1	RERRRKR↓GLF	N	NA	S	A	A	T	K	S	E	T	N	K	Q	R	Yes	M	R	R	E	S	V	D	M	L	N	I	E	L	F	M	D	H	M	S
A/Env/Guangdong/C17285752/QY/2017	H5N6	China	Environment	2017-11-21	EPI_ISL_340844	H6	H5N1	H5N1	2.3.4.4h	H5N1	Eurasian	H5N6	H5N1	2.3.4.4hG1	RERRRKR↓GLF	N	NA	S	A	A	T	K	S	E	T	N	K	Q	R	Yes	M	R	R	E	S	V	D	M	L	N	I	E	L	F	M	D	H	M	S
A/Env/Guangdong/C17285753/QY/2017	H5N6	China	Environment	2017-11-21	EPI_ISL_340845	H6	H5N1	H5N1	2.3.4.4h	H5N1	Eurasian	H5N6	H5N1	2.3.4.4hG1	RERRRKR↓GLF	N	NA	S	A	A	T	K	S	E	T	N	K	Q	R	Yes	M	R	R	E	S	V	D	M	L	N	I	E	L	F	M	D	H	M	S
A/Env/Guangdong/Dongguan/C172863577/2017	H5N6	China	Environment	2017-12-04	EPI_ISL_340812	H6	H5N1	H5N1	2.3.4.4h	H5N1	Eurasian	H5N6	H5N1	2.3.4.4hG1	RERRRKR↓GLF	N	NA	S	A	A	T	K	S	E	T	D	K	Q	R	Yes	M	R	R	E	S	V	D	M	L	N	I	E	L	F	M	D	H	M	S
A/Env/Guangdong/EN17275405/FSH/2017	H5N6	China	Environment	2017-10-18	EPI_ISL_340839	H6	H5N1	H5N1	2.3.4.4h	H5N1	Eurasian	H5N6	H5N1	2.3.4.4hG1	RERRRKR↓GLF	N	NA	S	A	A	T	K	S	E	T	N	K	Q	R	Yes	M	R	R	E	S	V	D	M	L	N	I	E	L	F	M	D	H	M	S
A/Env/Guangdong/Foshan/C172750528/2017	H5N6	China	Environment	2017-12-05	EPI_ISL_340811	H6	H5N1	H5N1	2.3.4.4h	H5N1	Eurasian	H5N6	H5N1	2.3.4.4hG1	RERRRKR↓GLF	N	NA	S	A	A	T	K	S	E	T	D	K	Q	R	Yes	M	R	R	E	S	V	D	M	L	N	I	E	L	F	M	D	H	M	S
A/Env/Guangdong/Foshan/C182750020/2018	H5N6	China	Environment	2018-01-02	EPI_ISL_340833	H6	H5N1	H5N1	2.3.4.4h	H5N1	Eurasian	H5N6	H5N1	2.3.4.4hG1	RERRRKR↓GLF	N	NA	S	A	A	T	K	S	E	T	N	K	Q	R	Yes	M	R	R	E	S	V	D	M	L	N	I	E	L	F	M	D	H	M	S
A/Env/Guangdong/Foshan/C182750024/2018	H5N6	China	Environment	2018-01-09	EPI_ISL_340818	H6	H5N1	H5N1	2.3.4.4h	H5N1	Eurasian	H5N6	H5N1	2.3.4.4hG1	RERRRKR↓GLF	N	NA	S	A	A	T	K	S	E	T	N	K	Q	R	Yes	M	R	R	E	S	V	D	M	L	N	I	E	L	F	M	D	H	M	S
A/Env/Guangdong/Foshan/C182750200/2018	H5N6	China	Environment	2018-03-06	EPI_ISL_340807	H6	H5N1	H5N1	2.3.4.4h	H5N1	Eurasian	H5N6	H5N1	2.3.4.4hG1	RERRRKR↓GLF	N	NA	S	A	A	T	K	S	E	T	D	K	Q	R	Yes	M	R	R	E	S	V	D	M	L	N	I	E	L	F	M	D	H	M	S
A/Env/Guangdong/Foshan/C182753007/2018	H5N6	China	Environment	2018-01-02	EPI_ISL_340808	H6	H5N1	H5N1	2.3.4.4h	H5N1	Eurasian	H5N6	H5N1	2.3.4.4hG1	RERRRKR↓GLF	N	NA	S	A	A	T	K	S	E	T	D	K	Q	R	Yes	M	R	R	E	S	V	D	M	L	N	I	E	L	F	M	D	H	M	S
A/Env/Guangdong/Huizhou/C17280804/2017	H5N6	China	Environment	2017-11-21	EPI_ISL_340799	H6	H5N1	H5N1	2.3.4.4h	H5N1	Eurasian	H5N6	H5N1	2.3.4.4hG1	RERRRKR↓GLF	N	NA	S	A	A	T	K	S	E	T	D	K	Q	R	Yes	M	R	R	E	S	V	D	M	L	N	I	E	L	F	M	D	H	M	S
A/Env/Guangdong/Huizhou/C18280077/2018	H5N6	China	Environment	2017-11-21	EPI_ISL_340799	H6	H5N1	H5N1	2.3.4.4h	H5N1	Eurasian	H5N6	H5N1	2.3.4.4hG1	RERRRKR↓GLF	N	NA	S	A	A	T	K	S	E	A	D	K	Q	R	Yes	M	R	R	E	S	V	D	M	L	N	I	E	L	F	M	D	H	M	S
A/Env/Guangdong/Jieyang/C17289387/2017	H5N6	China	Environment	2017-12-05	EPI_ISL_340819	H6	H5N1	H5N1	2.3.4.4h	H5N1	Eurasian	H5N6	H5N1	2.3.4.4hG1	RERRRKR↓GLF	N	NA	S	A	A	T	K	S	E	T	N	K	Q	R	Yes	M	R	R	E	S	V	D	M	L	N	I	E	L	F	M	D	H	M	S
A/Env/Guangdong/Jieyang/C17289388/2017	H5N6	China	Environment	2017-12-05	EPI_ISL_340820	H6	H5N1	H5N1	2.3.4.4h	H5N1	Eurasian	H5N6	H5N1	2.3.4.4hG1	RERRRKR↓GLF	N	NA	S	A	A	T	K	S	E	T	N	K	Q	R	Yes	M	R	R	E	S	V	D	M	L	N	I	E	L	F	M	D	H	M	S
A/Env/Guangdong/Jieyang/C17289390/2017	H5N6	China	Environment	2017-12-05	EPI_ISL_340822	H6	H5N1	H5N1	2.3.4.4h	H5N1	Eurasian	H5N6	H5N1	2.3.4.4hG1	RERRRKR↓GLF	N	NA	S	A	A	T	K	S	E	T	N	K	Q	R	Yes	M	R	R	E	S	V	D	M	L	N	I	E	L	F	M	D	H	M	S
A/Env/Guangdong/Jieyang/C18289059/2018	H5N6	China	Environment	2018-02-06	EPI_ISL_340825	H6	H5N1	H5N1	2.3.4.4h	H5N1	Eurasian	H5N6	H5N1	2.3.4.4hG1	RERRRKR↓GLF	N	NA	S	A	A	T	K	S	E	T	N	K	Q	R	Yes	M	R	R	E	S	V	D	M	L	N	I	E	L	F	M	D	H	M	S
A/Env/Guangdong/Qingyuan/C18285099/2018	H5N6	China	Environment	2018-02-28	EPI_ISL_340806	H6	H5N1	H5N1	2.3.4.4h	H5N1	Eurasian	H5N6	H5N1	2.3.4.4hG1	RERRRKR↓GLF	N	NA	S	A	A	T	K	S	E	T	D	K	Q	R	Yes	M	R	R	E	S	V	D	M	L	N	I	E	L	F	M	D	H	M	S
A/Env/Guangdong/Shenzhen/C18061184/2018	H5N6	China	Environment	2018-05-08	EPI_ISL_340805	H6	H5N1	H5N1	2.3.4.4h	H5N1	Eurasian	H5N6	H5N1	2.3.4.4hG1	RERRRKR↓GLF	N	NA	S	A	A	T	K	S	E	T	D	K	Q	R	Yes	M	R	R	E	S	V	D	M	L	N	I	E	L	F	M	D	H	M	S
A/Env/Guangdong/Zhaoqing/C172790995/2017	H5N6	China	Environment	2017-12-12	EPI_ISL_340835	H6	H5N1	H5N1	2.3.4.4h	H5N1	Eurasian	H5N6	H5N1	2.3.4.4hG1	RERRRKR↓GLF	N	NA	S	A	A	T	K	S	E	T	N	K	Q	R	Yes	M	R	R	E	S	V	D	M	L	N	I	E	L	F	M	D	H	M	S
A/Env/Guangdong/zhanjiang/C18277209/2018	H5N6	China	Environment	2018-05-21	EPI_ISL_340794	H6	H5N1	H5N1	2.3.4.4h	H5N1	Eurasian	H5N6	H5N1	2.3.4.4hG1	RERRRKR↓GLF	N	NA	S	A	A	T	K	S	E	A	D	K	Q	R	Yes	M	R	R	E	S	V	D	M	L	N	I	E	L	F	M	D	H	M	S
A/Env/Guangdong/zhongshan/C172870590/2017	H5N6	China	Environment	2017-11-28	EPI_ISL_340846	H6	H5N1	H5N1	2.3.4.4h	H5N1	Eurasian	H5N6	H5N1	2.3.4.4hG1	RERRRKR↓GLF	N	NA	S	A	A	T	K	S	E	T	N	K	Q	R	Yes	M	R	R	E	S	V	D	M	L	N	I	E	L	F	M	D	H	M	S
A/Enviroment/Xuzhou/4018/2018	H5N6	China	Environment	2018-01-17	EPI_ISL_315236	H6	H5N1	H5N1	2.3.4.4h	H5N1	Eurasian	H5N6	H5N1	2.3.4.4hG1	RERRRKR↓GLF	N	NA	S	A	A	T	K	S	E	T	N	K	Q	R	Yes	M	R	R	E	S	V	D	M	L	N	I	E	L	F	M	D	H	M	S
A/Enviroment/Xuzhou/461/2017	H5N6	China	Environment	2018-01-20	EPI_ISL_315238	H6	H5N1	H5N1	2.3.4.4h	H5N1	Eurasian	H5N6	H5N1	2.3.4.4hG1	RERRRKR↓GLF	N	NA	S	A	A	T	K	S	E	T	N	K	Q	R	Yes	M	R	R	E	S	V	D	M	L	N	I	E	L	F	M	D	H	M	S
A/Goose/Guangdong/PO1707260055/GZH/2017	H5N6	China	Goose	2017-08-02	EPI_ISL_340852	H6	H5N1	H5N1	2.3.4.4h	H5N1	Eurasian	H5N6	H5N1	2.3.4.4hG1	RERRRKR↓GLF	N	NA	S	A	P	T	K	N	E	T	K	K	Q	R	Yes	M	R	R	E	S	V	D	M	L	N	I	E	L	F	M	D	H	M	S
A/Guangdong/18SF020/2018	H5N6	China	Human	2017-09-30	EPI_ISL_340796	H6	H5N1	H5N1	2.3.4.4h	H5N1	Eurasian	H5N6	H5N1	2.3.4.4hG1	RERRRKR↓GLF	N	NA	S	A	A	T	K	N	E	T	D	K	Q	R	Yes	M	R	R	V	S	V	D	M	L	N	I	E	L	F	M	D	H	M	S
A/Guangdong/18SF020/2018	H5N6	China	Human	2018-09-29	EPI_ISL_337274	H6	H5N1	H5N1	2.3.4.4h	H5N1	Eurasian	H5N6	H5N1	2.3.4.4hG1	RERRRKR↓GLF	N	NA	S	A	A	T	K	N	E	T	D	K	Q	R	Yes	M	R	R	V	S	V	D	M	L	N	I	E	L	F	M	D	H	M	S
A/Guangxi/13486/2017	H5N6	China	Human	2017-11-17	EPI_ISL_337280	H6	H5N1	H5N1	2.3.4.4h	H5N1	Eurasian	H5N6	H5N1	2.3.4.4hG1	RERRRKR↓GLF	N	NA	S	A	A	T	K	S	E	T	N	K	Q	R	Yes	M	R	R	K	S	V	D	M	L	N	I	E	L	F	M	D	H	M	S
A/Guangxi/31906/2018	H5N6	China	Human	2018-08-15	EPI_ISL_337273	H6	H5N1	H5N1	2.3.4.4h	H5N1	Eurasian	H5N6	H5N1	2.3.4.4hG1	RERRRKR↓GLF	N	NA	S	A	A	T	K	S	E	A	D	K	Q	R	Yes	M	R	R	K	S	V	D	M	L	N	I	G	L	F	M	D	H	M	S
A/Guangxi/32797/2018	H5N6	China	Human	2018-10-25	EPI_ISL_337276	H6	H5N1	H5N1	2.3.4.4h	H5N1	Eurasian	H5N6	H5N1	2.3.4.4hG1	RERRRKR↓GLF	N	NA	S	A	A	T	K	S	E	A	D	K	Q	R	Yes	M	R	R	K	S	V	D	M	L	N	I	E	L	F	M	D	H	M	S
A/Muscovyduck/China/FJFZ21/2020	H5N6	China	Muscovyduck	2020-08-12	EPI_ISL_833248	H6	H5N1	H5N1	2.3.4.4h	H5N1	Eurasian	H5N6	H5N1	2.3.4.4hG1	RERRRKR↓GLF	N	NA	S	A	A	T	K	S	E	T	D	K	Q	R	Yes	M	R	R	E	S	V	D	M	L	N	I	E	L	F	M	D	H	M	S
A/Muteswan/Xinjiang/4/2020	H5N6	China	Muteswan	2020-01-08	EPI_ISL_418172	H6	H5N1	H5N1	2.3.4.4h	H5N1	Eurasian	H5N6	H5N1	2.3.4.4hG1	RERRRKR↓GLF	N	NA	S	A	A	T	K	N	E	T	S	K	Q	R	Yes	M	R	R	E	S	V	D	M	L	N	I	E	L	F	M	D	H	M	S
A/Muteswan/Xinjiang/5/2020	H5N6	China	Muteswan	2020-01-08	EPI_ISL_418173	H6	H5N1	H5N1	2.3.4.4h	H5N1	Eurasian	H5N6	H5N1	2.3.4.4hG1	RERRRKR↓GLF	N	NA	S	A	A	T	K	N	E	T	S	K	Q	R	Yes	M	R	R	E	S	V	D	M	L	N	I	E	L	F	M	D	H	M	S
A/Whooperswan/Xinjiang/10/2020	H5N6	China	Whooperswan	2020-01-16	EPI_ISL_418178	H6	H5N1	H5N1	2.3.4.4h	H5N1	Eurasian	H5N6	H5N1	2.3.4.4hG1	RERRRKR↓GLF	N	NA	S	A	A	T	K	S	E	I	S	K	Q	R	Yes	M	R	R	E	S	V	D	M	L	N	I	E	L	F	M	D	H	M	S
A/Whooperswan/Xinjiang/11/2020	H5N6	China	Whooperswan	2020-01-17	EPI_ISL_418179	H6	H5N1	H5N1	2.3.4.4h	H5N1	Eurasian	H5N6	H5N1	2.3.4.4hG1	RERRRKR↓GLF	N	NA	S	A	A	T	K	S	E	I	S	K	Q	R	Yes	M	R	R	E	S	V	D	M	L	N	I	E	L	F	M	D	H	M	S
A/Whooperswan/Xinjiang/12/2020	H5N6	China	Whooperswan	2020-01-17	EPI_ISL_418180	H6	H5N1	H5N1	2.3.4.4h	H5N1	Eurasian	H5N6	H5N1	2.3.4.4hG1	RERRRKR↓GLF	N	NA	S	A	A	T	K	S	E	I	S	K	Q	R	Yes	M	R	R	E	S	V	D	M	L	N	I	E	L	F	M	D	H	M	S
A/Whooperswan/Xinjiang/13/2020	H5N6	China	Whooperswan	2020-01-17	EPI_ISL_418181	H6	H5N1	H5N1	2.3.4.4h	H5N1	Eurasian	H5N6	H5N1	2.3.4.4hG1	RERRRKR↓GLF	N	NA	S	A	A	T	K	S	E	I	S	K	Q	R	Yes	M	R	R	E	S	V	D	M	L	N	I	E	L	F	M	D	H	M	S
A/Whooperswan/Xinjiang/1/2020	H5N6	China	Whooperswan	2020-01-03	EPI_ISL_418169	H6	H5N1	H5N1	2.3.4.4h	H5N1	Eurasian	H5N6	H5N1	2.3.4.4hG1	RERRRKR↓GLF	N	NA	S	A	A	T	K	S	E	I	S	R	Q	R	Yes	M	R	R	E	S	V	D	M	L	N	I	E	L	F	M	D	H	M	S
A/Whooperswan/Xinjiang/2/2020	H5N6	China	Whooperswan	2020-01-03	EPI_ISL_418170	H6	H5N1	H5N1	2.3.4.4h	H5N1	Eurasian	H5N6	H5N1	2.3.4.4hG1	RERRRKR↓GLF	N	NA	S	A	A	T	K	S	E	I	S	K	Q	R	Yes	M	R	R	E	S	V	D	M	L	N	I	E	L	F	M	D	H	M	S
A/Whooperswan/Xinjiang/6/2020	H5N6	China	Whooperswan	2020-01-08	EPI_ISL_418174	H6	H5N1	H5N1	2.3.4.4h	H5N1	Eurasian	H5N6	H5N1	2.3.4.4hG1	RERRRKR↓GLF	N	NA	S	A	A	T	K	S	E	I	S	K	Q	R	Yes	M	R	R	E	S	V	D	M	L	N	I	E	L	F	M	D	H	M	S
A/Whooperswan/Xinjiang/7/2020	H5N6	China	Whooperswan	2020-01-12	EPI_ISL_418175	H6	H5N1	H5N1	2.3.4.4h	H5N1	Eurasian	H5N6	H5N1	2.3.4.4hG1	RERRRKR↓GLF	N	NA	S	A	A	T	K	S	E	I	S	K	Q	R	Yes	M	R	R	E	S	V	D	M	L	N	I	E	L	F	M	D	H	M	S
A/Whooperswan/Xinjiang/8/2020	H5N6	China	Whooperswan	2020-01-16	EPI_ISL_418176	H6	H5N1	H5N1	2.3.4.4h	H5N1	Eurasian	H5N6	H5N1	2.3.4.4hG1	RERRRKR↓GLF	N	NA	S	A	A	T	K	S	E	I	S	K	Q	R	Yes	M	R	R	E	S	V	D	M	L	N	I	E	L	F	M	D	H	M	S
A/Whooperswan/Xinjiang/9/2020	H5N6	China	Whooperswan	2020-01-16	EPI_ISL_418177	H6	H5N1	H5N1	2.3.4.4h	H5N1	Eurasian	H5N6	H5N1	2.3.4.4hG1	RERRRKR↓GLF	N	NA	S	A	A	T	K	S	E	I	S	K	Q	R	Yes	M	R	R	E	S	V	D	M	L	N	I	E	L	F	M	D	H	M	S
A/duck/Guangdong/7/20/DGCP036/O/2017	H5N6	China	Duck	2017-07-02	EPI_ISL_697004	H6	H5N1	H5N1	2.3.4.4h	H5N1	Eurasian	H5N6	H5N1	2.3.4.4hG1	RERRRKR↓GLF	N	NA	S	A	A	T	K	N	E	T	N	K	Q	R	Yes	M	R	R	E	S	V	D	M	L	N	I	E	L	F	M	D	H	M	S
A/duck/Guizhou/7/27/ZYLJJ017/O/2018	H5N6	China	Duck	2018-07-27	EPI_ISL_696807	H6	H5N1	H5N1	2.3.4.4h	H5N1	Eurasian	H5N6	H5N1	2.3.4.4hG1	RERRRKR↓GLF	N	NA	S	A	A	T	K	S	E	A	D	K	Q	R	Yes	M	R	R	E	S	V	D	M	L	N	I	E	L	F	M	D	H	M	S
A/duck/Guizhou/8/26/ZYLJJ016/O/2018	H5N6	China	Duck	2018-08-26	EPI_ISL_696813	H6	H5N1	H5N1	2.3.4.4h	H5N1	Eurasian	H5N6	H5N1	2.3.4.4hG1	RERRRKR↓GLF	N	NA	S	A	A	T	K	S	E	A	D	K	Q	R	Yes	M	R	R	E	S	V	D	M	L	N	I	G	L	F	M	D	H	M	S
A/duck/Guizhou/8/26/ZYLJJ017/O/2018	H5N6	China	Duck	2018-08-26	EPI_ISL_707465	H6	H5N1	H5N1	2.3.4.4h	H5N1	Eurasian	H5N6	H5N1	2.3.4.4hG1	RERRRKR↓GLF	N	NA	S	A	A	T	K	S	E	A	D	K	Q	R	Yes	M	R	R	E	S	V	D	M	L	N	I	G	L	F	M	D	H	M	S
A/duck/Hainan/12/29/HKPL002/C/2017	H5N6	China	Duck	2017-12-29	EPI_ISL_707469	H6	H5N1	H5N1	2.3.4.4h	H5N1	Eurasian	H5N6	H5N1	2.3.4.4hG1	RERRRKR↓GLF	N	NA	S	A	A	T	K	S	E	A	D	K	Q	R	Yes	M	R	R	E	S	V	D	M	L	N	I	E	L	F	M	D	H	M	S
A/duck/Hunan/11/30/YYGK62E3/OC/2017	H5N6	China	Duck	2017-11-03	EPI_ISL_707501	H6	H5N1	H5N1	2.3.4.4h	H5N1	Eurasian	H5N6	H5N1	2.3.4.4hG1	RERRRKR↓GLF	N	NA	S	A	A	T	K	S	E	T	N	K	Q	R	Yes	M	R	R	E	S	V	D	M	L	N	I	E	L	F	M	D	H	M	S
A/duck/Hunan/11/30/YYGK63E3/OC/2017	H5N6	China	Duck	2017-11-03	EPI_ISL_707502	H6	H5N1	H5N1	2.3.4.4h	H5N1	Eurasian	H5N6	H5N1	2.3.4.4hG1	RERRRKR↓GLF	N	NA	S	A	A	T	K	N	E	T	N	K	Q	R	Yes	M	R	R	E	S	V	D	M	L	N	I	E	L	F	M	D	H	M	S
A/duck/Hunan/1/12/YYGK68H3/OC/2018	H5N6	China	Duck	2018-01-12	EPI_ISL_707489	H6	H5N1	H5N1	2.3.4.4h	H5N1	Eurasian	H5N6	H5N1	2.3.4.4hG1	RERRRKR↓GLF	N	NA	S	A	A	T	K	S	E	T	D	K	Q	R	Yes	M	R	R	E	S	V	D	M	L	N	I	E	L	F	M	D	H	M	S
A/duck/Hunan/1/12/YYGK72H3/OC/2018	H5N6	China	Duck	2018-01-12	EPI_ISL_707490	H6	H5N1	H5N1	2.3.4.4h	H5N1	Eurasian	H5N6	H5N1	2.3.4.4hG1	RERRRKR↓GLF	N	NA	S	A	A	T	K	S	E	T	D	K	Q	R	Yes	M	R	R	E	S	V	D	M	L	N	I	E	L	F	M	D	H	M	S
A/duck/Hunan/2/06/YYGK78J3/OC/2018	H5N6	China	Duck	2018-02-06	EPI_ISL_707524	H6	H5N1	H5N1	2.3.4.4h	H5N1	Eurasian	H5N6	H5N1	2.3.4.4hG1	RERRRKR↓GLF	N	NA	S	A	A	T	K	S	E	T	D	K	Q	R	No	M	R	R	E	S	V	D	M	L	N	I	E	L	F	M	D	H	M	S
A/duck/Jiangxi/01/11/NCNP101G2/OC/2017	H5N6	China	Duck	2017-01-11	EPI_ISL_707533	H6	H5N1	H5N1	2.3.4.4h	H5N1	Eurasian	H5N6	H5N1	2.3.4.4hG1	RERRRKR↓GLF	N	NA	S	A	P	T	K	N	E	T	S	K	Q	R	Yes	M	R	R	E	S	V	D	M	L	N	I	E	L	F	M	D	H	M	S
A/duck/Jiangxi/11/29/NCNP39D3/OC/2017	H5N6	China	Duck	2017-11-29	EPI_ISL_696703	H6	H5N1	H5N1	2.3.4.4h	H5N1	Eurasian	H5N6	H5N1	2.3.4.4hG1	RERRRKR↓GLF	N	NA	S	A	P	T	K	N	E	T	S	K	Q	R	Yes	M	R	R	E	S	V	D	M	L	N	I	E	L	F	M	D	H	M	S
A/duck/Jiangxi/2/28NCNP23K3/OC/2018	H5N6	China	Duck	2018-02-28	EPI_ISL_707554	H6	H5N1	H5N1	2.3.4.4h	H5N1	Eurasian	H5N6	H5N1	2.3.4.4hG1	RERRRKR↓GLF	N	NA	S	A	A	T	K	S	E	T	N	K	Q	R	Yes	M	R	R	E	S	V	D	M	L	N	I	E	L	F	M	D	H	M	S
A/duck/Jiangxi/2/28/NCNP25K3/OC/2018	H5N6	China	Duck	2018-02-28	EPI_ISL_707555	H6	H5N1	H5N1	2.3.4.4h	H5N1	Eurasian	H5N6	H5N1	2.3.4.4hG1	RERRRKR↓GLF	N	NA	S	A	A	T	K	S	E	T	N	K	Q	R	Yes	M	R	R	E	S	V	D	M	L	N	I	E	L	F	M	D	H	M	S
A/duck/Jiangxi/5/26/NCDZT80Q2/OC/2017	H5N6	China	Duck	2017-05-26	EPI_ISL_707570	H6	H5N1	H5N1	2.3.4.4h	H5N1	Eurasian	H5N6	H5N1	2.3.4.4hG1	RERRRKR↓GLF	N	NA	S	A	P	T	K	N	E	T	S	K	Q	R	Yes	M	R	R	E	S	V	D	M	L	N	I	E	L	F	M	D	H	M	S
A/environment/HongKong/WCRB/1/2018	H5N6	China	Environment	2018-01-09	EPI_ISL_885144	H6	H5N1	H5N1	2.3.4.4h	H5N1	Eurasian	H5N6	H5N1	2.3.4.4hG1	RERRRKR↓GLF	N	NA	S	A	A	T	K	S	E	A	D	K	Q	R	Yes	M	R	R	E	S	V	D	M	L	N	I	E	L	F	M	D	H	M	S
A/goose/Fujian/3/15/FZHX0001/O/2018	H5N6	China	Goose	2018-03-15	EPI_ISL_696991	H6	H5N1	H5N1	2.3.4.4h	H5N1	Eurasian	H5N6	H5N1	2.3.4.4hG1	RERRRKR↓GLF	N	NA	S	A	A	T	K	S	E	T	D	K	Q	R	Yes	M	R	R	E	S	V	D	M	M	N	I	E	L	F	M	D	H	M	S
A/goose/Fujian/3/15/FZHX0005/C/2018	H5N6	China	Goose	2018-03-15	EPI_ISL_696994	H6	H5N1	H5N1	2.3.4.4h	H5N1	Eurasian	H5N6	H5N1	2.3.4.4hG1	RERRRKR↓GLF	N	NA	S	A	A	T	K	S	E	T	D	K	Q	R	Yes	M	R	R	E	S	V	D	M	M	N	I	E	L	F	M	D	H	M	S
A/goose/Fujian/3/15/FZHX0007/C/2018	H5N6	China	Goose	2018-03-15	EPI_ISL_696995	H6	H5N1	H5N1	2.3.4.4h	H5N1	Eurasian	H5N6	H5N1	2.3.4.4hG1	RERRRKR↓GLF	N	NA	S	A	A	T	K	N	E	T	N	K	Q	R	Yes	M	R	R	E	S	V	D	M	L	N	I	E	L	F	M	D	H	M	S
A/goose/Fujian/3/15/FZHX0007/O/2018	H5N6	China	Goose	2018-03-15	EPI_ISL_696992	H6	H5N1	H5N1	2.3.4.4h	H5N1	Eurasian	H5N6	H5N1	2.3.4.4hG1	RERRRKR↓GLF	N	NA	S	A	A	T	K	S	E	T	D	K	Q	R	Yes	M	R	R	E	S	V	D	M	L	N	I	E	L	F	M	D	H	M	S
A/goose/Fujian/3/15/FZHX0008/C/2018	H5N6	China	Goose	2018-03-15	EPI_ISL_707653	H6	H5N1	H5N1	2.3.4.4h	H5N1	Eurasian	H5N6	H5N1	2.3.4.4hG1	RERRRKR↓GLF	N	NA	S	A	A	T	K	S	E	T	D	K	Q	R	Yes	M	R	R	E	S	V	D	M	L	N	I	E	L	F	M	D	H	M	S
A/goose/Fujian/3/15/FZHX0010/O2018	H5N6	China	Goose	2018-03-15	EPI_ISL_696993	H6	H5N1	H5N1	2.3.4.4h	H5N1	Eurasian	H5N6	H5N1	2.3.4.4hG1	RERRRKR↓GLF	N	NA	S	A	A	T	K	S	E	T	D	K	Q	R	Yes	M	R	R	E	S	V	D	M	L	N	I	E	L	F	M	D	H	M	S
A/mink/EasternChina/032/2018	H5N6	China	Mink	2018-01-10	EPI_ISL_502202	H6	H5N1	H5N1	2.3.4.4h	H5N1	Eurasian	H5N6	H5N1	2.3.4.4hG1	RERRRKR↓GLF	N	NA	S	A	A	T	K	S	E	T	N	K	Q	R	Yes	M	R	R	E	S	V	D	M	L	N	I	E	L	F	M	D	H	M	S
A/mink/EasternChina/0824/2018	H5N6	China	Mink	2018-08-24	EPI_ISL_502206	H6	H5N1	H5N1	2.3.4.4h	H5N1	Eurasian	H5N6	H5N1	2.3.4.4hG1	RERRRKR↓GLF	N	NA	S	A	A	T	K	S	E	T	N	K	Q	R	Yes	M	R	R	K	S	V	D	M	L	N	I	E	L	F	M	D	H	M	S
A/mink/EasternChina/149/2018	H5N6	China	Mink	2018-02-22	EPI_ISL_502204	H6	H5N1	H5N1	2.3.4.4h	H5N1	Eurasian	H5N6	H5N1	2.3.4.4hG1	RERRRKR↓GLF	N	NA	S	A	A	T	K	N	E	T	N	K	Q	R	Yes	M	R	R	E	S	V	D	V	L	N	I	E	L	F	M	D	H	M	S
A/mink/EasternChina/571/2018	H5N6	China	Mink	2018-06-13	EPI_ISL_502208	H6	H5N1	H5N1	2.3.4.4h	H5N1	Eurasian	H5N6	H5N1	2.3.4.4hG1	RERRRKR↓GLF	N	NA	S	A	A	T	K	S	E	T	N	K	Q	R	Yes	M	R	R	E	S	V	D	M	L	N	I	E	L	F	M	D	H	M	S
A/pigeon/Hainan/1/14/HKPL006/C/2018	H5N6	China	Pigeon	2018-01-14	EPI_ISL_696843	H6	H5N1	H5N1	2.3.4.4h	H5N1	Eurasian	H5N6	H5N1	2.3.4.4hG1	RERRRKR↓GLF	N	NA	S	A	A	T	K	S	E	T	N	K	Q	R	Yes	M	R	R	E	S	I	D	M	L	N	I	G	L	F	M	D	H	M	S
A/China/Original/2018	H5N6	China	Human	2018-11-06	EPI_ISL_368368	H6	H5N1	H5N6	2.3.4.4h	H5N1	Eurasian	H5N6	H5N1	2.3.4.4hG1	RERRRKR↓GLF	N	NA	S	A	P	T	K	N	E	T	K	K	Q	G	Yes	M	R	R	E	S	V	D	M	L	N	I	E	L	F	M	D	H	M	S
A/Duck/Guangdong/PO17281388/MZH/2017	H5N6	China	Duck	2017-10-24	EPI_ISL_340792	H6	H5N1	H5N6	2.3.4.4h	H5N1	Eurasian	H5N6	H5N1	2.3.4.4hG1	RERRRKR↓GLF	N	NA	S	A	A	T	K	S	E	T	D	K	Q	R	Yes	M	R	R	E	S	V	D	M	L	N	I	E	L	F	M	D	H	M	S
A/Jiangsu/32888/2018	H5N6	China	Human	2018-11-06	EPI_ISL_337275	H6	H5N1	H5N6	2.3.4.4h	H5N1	Eurasian	H5N6	H5N1	2.3.4.4hG1	RERRRKR↓GLF	N	NA	S	A	P	T	K	N	E	T	K	K	Q	R	Yes	M	R	R	E	S	V	D	M	L	N	I	E	L	F	M	D	H	M	S
A/chicken/Anhui/8/28/YHZGS017/O/2018	H5N6	China	Chicken	2018-08-28	EPI_ISL_699166	H6	H5N1	H5N6	2.3.4.4h	H5N1	Eurasian	H5N6	H5N1	2.3.4.4hG1	RERRRKR↓GLF	N	NA	S	A	P	T	K	N	E	T	K	K	Q	G	Yes	M	R	R	E	S	V	D	M	L	N	I	E	L	F	M	D	H	M	S
A/chicken/Hunan/03/07/YYGK74L3/OC/2018	H5N6	China	Chicken	2018-03-07	EPI_ISL_696739	H6	H5N1	H5N6	2.3.4.4h	H5N1	Eurasian	H5N6	H5N1	2.3.4.4hG1	RERRRKR↓GLF	N	NA	S	A	P	T	K	N	E	T	K	K	Q	G	Yes	M	R	R	E	S	V	D	M	L	N	I	E	L	F	M	D	H	M	S
A/duck/Hunan/01/12/YYGK82H3/OC/2018	H5N6	China	Duck	2018-01-12	EPI_ISL_707475	H6	H5N1	H5N6	2.3.4.4h	H5N1	Eurasian	H5N6	H5N1	2.3.4.4hG1	RERRRKR↓GLF	N	NA	S	A	A	T	K	S	E	T	N	K	Q	R	Yes	M	R	R	E	S	V	D	M	L	N	I	E	L	F	M	D	H	M	S
A/duck/Hunan/1/12/YYGK74H3/OC/2018	H5N6	China	Duck	2018-01-12	EPI_ISL_707491	H6	H5N1	H5N6	2.3.4.4h	H5N1	Eurasian	H5N6	H5N1	2.3.4.4hG1	RERRRKR↓GLF	N	NA	S	A	A	T	K	S	E	T	N	K	Q	R	Yes	M	R	R	E	S	V	D	M	L	N	I	E	L	F	M	D	H	M	S
A/Chicken/Xuzhou/470/2017	H5N6	China	Chicken	2017-12-20	EPI_ISL_315237	H6	H3N2	H5N1	2.3.4.4h	H5N1	Eurasian	H5N8	H5N1	2.3.4.4hG2	RERRRKR↓GLF	N	NA	S	A	A	T	K	S	E	T	N	K	Q	R	Yes	M	R	R	E	S	V	D	M	L	N	I	E	L	F	M	D	H	M	S
A/GX/hechi/01/2021	H5N6	China	Human	2021-02-27	EPI_ISL_3770721	H6	H3N2	H7N9/H9N2	2.3.4.4h	H5N1	Eurasian	H7N9/H9N2	H5N1	2.3.4.4hG3	RERRRKR↓GLF	N	NA	S	A	A	T	K	N	E	T	K	K	Q	G	Yes	M	R	R	E	A	V	D	M	L	N	I	E	F	F	M	D	H	M	N
A/chicken/Hunan/02/06/YYGK37J3/OC/2018	H5N6	China	Chicken	2018-02-06	EPI_ISL_699429	H6	H5N1	H5N1	2.3.4.4h	H5N1	Eurasian	H5N1	H5N1	2.3.4.4hG4	RERRRKR↓GLF	N	NA	S	A	A	T	K	S	E	T	N	K	Q	R	Yes	M	R	R	E	S	V	D	M	L	N	I	E	L	F	M	D	H	M	S
A/duck/Hunan/03/07/YYGK25L3/OC/2018	H5N6	China	Duck	2018-03-07	EPI_ISL_696689	H6	H5N1	H5N1	2.3.4.4h	H5N1	Eurasian	H5N1	H5N1	2.3.4.4hG4	RERRRKR↓GLF	N	NA	S	A	A	T	K	S	E	T	N	K	Q	R	Yes	M	R	R	E	S	V	D	M	L	N	I	E	L	F	M	D	H	M	S
A/duck/Hunan/03/24/YYGK174M2/C/2017	H5N6	China	Duck	2017-03-24	EPI_ISL_707478	H6	H5N1	H5N1	2.3.4.4h	H5N1	Eurasian	H5N1	H5N1	2.3.4.4hG4	RERRRKR↓GLF	N	NA	S	A	P	T	K	N	E	T	N	K	Q	R	Yes	M	R	R	E	S	I	D	M	L	N	I	E	L	F	M	D	H	M	S
A/duck/Hunan/03/24/YYGK178M2/C/2017	H5N6	China	Duck	2017-03-24	EPI_ISL_707479	H6	H5N1	H5N1	2.3.4.4h	H5N1	Eurasian	H5N1	H5N1	2.3.4.4hG4	RERRRKR↓GLF	N	NA	S	A	P	T	K	N	E	T	N	K	Q	R	Yes	M	R	R	E	S	I	D	M	L	N	I	E	L	F	M	D	H	M	S
A/duck/Hunan/03/24/YYGK18M2/O/2017	H5N6	China	Duck	2017-03-24	EPI_ISL_707480	H6	H5N1	H5N1	2.3.4.4h	H5N1	Eurasian	H5N1	H5N1	2.3.4.4hG4	RERRRKR↓GLF	N	NA	S	A	P	T	K	N	E	T	N	K	Q	R	Yes	M	R	R	E	S	I	D	M	L	N	I	E	L	F	M	D	H	M	S
A/duck/Hunan/03/24/YYGK21M2/O/2017	H5N6	China	Duck	2017-03-24	EPI_ISL_707481	H6	H5N1	H5N1	2.3.4.4h	H5N1	Eurasian	H5N1	H5N1	2.3.4.4hG4	RERRRKR↓GLF	N	NA	S	A	P	T	K	N	E	T	N	K	Q	R	Yes	M	R	R	E	S	I	D	M	L	N	I	E	L	F	M	D	H	M	S
A/duck/Hunan/2/06/YYGK77J3/OC/2018	H5N6	China	Duck	2018-02-06	EPI_ISL_707523	H6	H5N1	H5N1	2.3.4.4h	H5N1	Eurasian	H5N1	H5N1	2.3.4.4hG4	RERRRKR↓GLF	N	NA	S	A	A	T	K	S	E	T	N	K	Q	R	Yes	M	R	R	E	S	V	D	M	L	N	I	E	L	F	M	D	H	M	S
A/duck/Hunan/2/06/YYGK84J3/OC/2018	H5N6	China	Duck	2018-02-06	EPI_ISL_707525	H6	H5N1	H5N1	2.3.4.4h	H5N1	Eurasian	H5N1	H5N1	2.3.4.4hG4	RERRRKR↓GLF	N	NA	S	A	A	T	K	S	E	T	N	K	Q	R	Yes	M	R	R	E	S	V	D	M	L	N	I	E	L	F	M	D	H	M	S
A/duck/Hunan/2/06/YYGK92J3/OC/2018	H5N6	China	Duck	2018-02-06	EPI_ISL_707527	H6	H5N1	H5N1	2.3.4.4h	H5N1	Eurasian	H5N1	H5N1	2.3.4.4hG4	RERRRKR↓GLF	N	NA	S	A	A	T	K	S	E	T	N	K	Q	R	Yes	M	R	R	E	S	V	D	M	L	N	I	E	L	F	M	D	H	M	S
A/goose/Guangdong/7/20/DGCP010/C/2017	H5N6	China	Goose	2017-07-02	EPI_ISL_707658	H6	H5N1	H5N1	2.3.4.4h	H5N1	Eurasian	H5N1	H5N1	2.3.4.4hG4	RERRRKR↓GLF	N	NA	S	A	A	T	K	S	E	T	D	K	Q	R	Yes	M	R	R	E	S	V	D	M	L	N	I	E	L	F	M	D	H	M	S
A/chicken/Sichuan/k141/2017	H5N6	China	Chicken	2017-01-12	EPI_ISL_505073	H6	H5N8	H5N1	2.3.4.4h	H5N1	Eurasian	H5N1	H5N1	2.3.4.4hG5	RERRRKR↓GLF	N	NA	S	A	P	T	K	N	E	T	N	K	Q	R	Yes	M	R	R	E	S	V	D	M	L	N	I	E	L	F	M	D	H	M	S
A/Env/Guangdong/zhongshan/C182870028/2018	H5N6	China	Environment	2018-01-15	EPI_ISL_340816	H6	H5N6	H5N1	2.3.4.4h	H5N1	Eurasian	H5N1	H5N1	2.3.4.4hG6	RERRRKR↓GLF	N	NA	S	A	A	T	K	S	E	T	N	K	Q	R	Yes	M	R	R	E	S	V	D	M	L	N	I	E	L	F	M	D	H	M	S
A/Env/Guangdong/zhongshan/C182870234/2018	H5N6	China	Environment	2018-04-24	EPI_ISL_340798	H6	H5N6	H5N1	2.3.4.4h	H5N1	Eurasian	H5N1	H5N1	2.3.4.4hG6	RERRRKR↓GLF	N	NA	S	A	A	T	K	S	E	T	D	K	K	S	Yes	M	R	R	E	S	V	D	M	L	N	I	E	L	F	M	D	H	M	S
A/Enviroment/Changzhou/768/2017/2017	H5N6	China	Enviroment	2017-09-19	EPI_ISL_347793	H6	H5N6	H5N1	2.3.4.4h	H5N1	Eurasian	H5N1	H5N1	2.3.4.4hG6	RERRRKR↓GLF	N	NA	S	A	P	T	K	N	E	T	N	K	Q	R	Yes	M	R	R	E	S	V	D	M	L	N	I	E	L	F	M	D	H	M	S
A/duck/China/0936/2017	H5N6	China	Duck	2017-09-22	EPI_ISL_503024	H6	H5N6	H5N1	2.3.4.4h	H5N1	Eurasian	H5N1	H5N1	2.3.4.4hG6	RERRRKR↓GLF	N	NA	S	A	P	T	K	S	E	T	N	K	Q	R	Yes	M	R	R	E	S	V	D	M	L	N	I	E	L	F	M	D	H	M	S
A/duck/Fujian/10/26/FZHX0034/C/2017/2017	H5N6	China	Duck	2017-10-26	EPI_ISL_697188	H6	H5N6	H5N1	2.3.4.4h	H5N1	Eurasian	H5N1	H5N1	2.3.4.4hG6	RERRRKR↓GLF	N	NA	S	A	A	T	K	S	E	T	D	K	Q	R	Yes	M	R	R	E	S	V	D	M	L	N	I	E	L	F	M	D	H	M	S
A/duck/Hunan/1/17/YYGKK80/OC/2017/2017	H5N6	China	Duck	2017-01-17	EPI_ISL_707493	H6	H5N6	H5N1	2.3.4.4h	H5N1	Eurasian	H5N1	H5N1	2.3.4.4hG6	RERRRKR↓GLF	N	NA	S	A	P	T	K	N	E	T	N	K	Q	R	Yes	M	R	R	E	S	V	D	M	L	N	I	E	L	F	M	D	H	M	S
A/Env/Guangdong/zhanjiang/C17277335/2017	H5N6	China	Environment	2017-11-27	EPI_ISL_340830	H3N2	H3N2	H3N2	2.3.4.4h	H3N2	Eurasian	H3N2	H3N2	2.3.4.4hG7	RERRRKR↓GLF	N	NA	S	A	A	T	K	S	E	T	N	K	Q	R	Yes	M	R	R	E	A	V	D	M	L	N	V	E	L	F	M	D	H	M	S
A/Env/Guangdong/zhanjiang/C17277346/2017	H5N6	China	Environment	2017-12-05	EPI_ISL_340788	H3N2	H3N2	H3N2	2.3.4.4h	H3N2	Eurasian	H3N2	H3N2	2.3.4.4hG7	RERRRKR↓GLF	N	NA	S	A	P	T	K	S	E	T	N	K	Q	R	Yes	M	R	R	E	A	V	D	M	L	N	V	E	L	F	M	D	H	M	S
A/Env/Guangdong/zhanjiang/C18277135/2018	H5N6	China	Environment	2018-04-02	EPI_ISL_340832	H3N2	H3N2	H3N2	2.3.4.4h	H3N2	Eurasian	H3N2	H3N2	2.3.4.4hG7	RERRRKR↓GLF	N	NA	S	A	A	T	K	S	E	T	K	K	Q	S	Yes	M	R	R	E	A	V	D	M	L	N	V	E	L	F	M	D	H	M	S
A/Env/Guangdong/zhanjiang/C18277136/2018	H5N6	China	Environment	2018-04-02	EPI_ISL_340823	H3N2	H3N2	H3N2	2.3.4.4h	H3N2	Eurasian	H3N2	H3N2	2.3.4.4hG7	RERRRKR↓GLF	N	NA	S	A	A	T	K	S	E	T	K	K	Q	S	Yes	M	R	R	E	A	V	D	M	L	N	V	E	L	F	M	D	H	M	S
A/Chicken/Yangzhou/f14/2018	H5N6	China	Chicken	2018-11-14	EPI_ISL_347757	H5N8	H5N1	H5N1	2.3.4.4h	H5N1	Eurasian	H5N6	H5N1	2.3.4.4hG8	RERRRKR↓GLF	N	NA	S	A	A	T	K	S	E	T	N	K	Q	C	Yes	M	R	R	E	A	I	D	M	L	N	I	E	L	F	M	D	H	M	S
A/Chicken/Yangzhou/f6/2018	H5N6	China	Chicken	2018-11-14	EPI_ISL_347752	H5N8	H5N1	H5N1	2.3.4.4h	H5N1	Eurasian	H5N6	H5N1	2.3.4.4hG8	RERRRKR↓GLF	N	NA	S	A	A	T	K	S	E	T	N	K	Q	C	Yes	M	R	R	E	A	I	D	M	L	N	I	E	L	F	M	D	H	M	S
A/Chicken/Yangzhou/f9/2018	H5N6	China	Chicken	2018-11-14	EPI_ISL_347754	H5N8	H5N1	H5N1	2.3.4.4h	H5N1	Eurasian	H5N6	H5N1	2.3.4.4hG8	RERRRKR↓GLF	N	NA	S	A	A	T	K	N	E	T	N	K	Q	C	Yes	M	R	R	E	A	I	D	M	L	N	I	E	L	F	M	D	H	M	S
A/mink/EasternChina/528/2018	H5N6	China	Mink	2018-06-06	EPI_ISL_502205	H5N8	H5N8	H5N8	2.3.4.4h	H5N1	Eurasian	H5N8	H5N8	2.3.4.4hG9	RERRRKR↓GLF	N	NA	S	A	P	T	K	N	E	T	S	K	Q	R	Yes	M	R	R	E	A	I	D	M	L	N	V	E	L	F	M	D	H	M	S
A/mink/EasternChina/006/2018	H5N6	China	Mink	2018-01-03	EPI_ISL_502201	H5N8	H5N8	H5N8	2.3.4.4h	H5N1	Eurasian	H5N8	H5N8	2.3.4.4hG9	RERRRKR↓GLF	N	NA	S	A	P	T	K	N	E	T	S	K	Q	R	Yes	M	R	R	E	A	I	D	M	L	N	V	E	L	F	M	D	H	M	S
A/Jiangsu/1/2020	H5N6	China	Human	2020-11-25	EPI_ISL_718225	H5N8	H5N8	Other subtypes	2.3.4.4h	H5N1	Eurasian	H5N6	Other subtypes	2.3.4.4hG10	RERRRKR↓GLF	N	NA	S	A	P	T	K	N	E	T	K	K	Q	G	Yes	M	R	R	E	A	V	D	M	L	N	I	E	L	Y	M	D	H	M	S
a Virus names with bold were isolated in this study. b ↓ indicates cleavage position. NA indicates gap. ‡ The numbering of the amino acid is relative to A/goose/Guangdong/1/1996. Numbering of HA is based on mature sequences without the N-terminal signal peptides. * Boldface indicates identified mutations associated with increased viral phenotypic characteristics previously; pathogenicity; binding…															Pathogenicity	Receptor binding preference														Virulence, transmission, replication efficiency, and adaptation in mammals																			Antiviral drug resistance
