# Supplementary figures and images for: Phylogenetic and Phylogeographic Analysis of the Highly Pathogenic H5N6 Avian Influenza Virus in China
Source: MDPI journal article supplement (doi:10.3390/v14081752), 2022-08-11

NP

Colored ranges

- H7N9/H9N2
- H3N2
- H5N8
- H5N1

Tree scale: 0.01

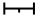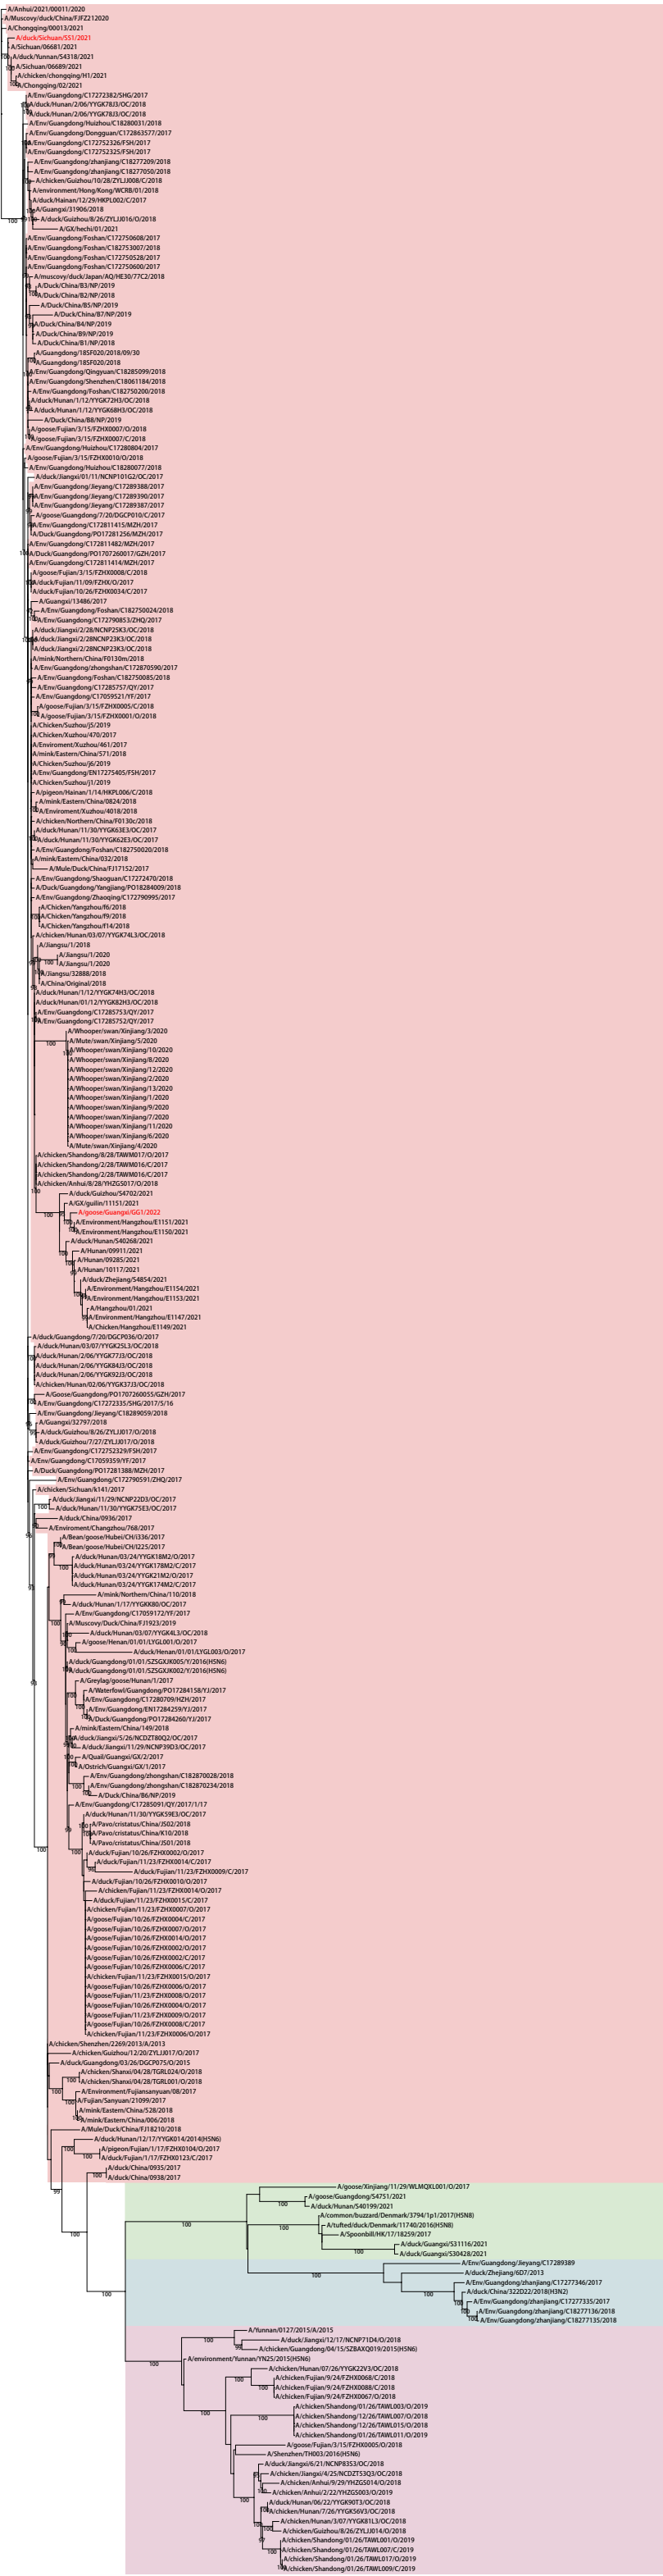

Supplement: s1 [file s1]

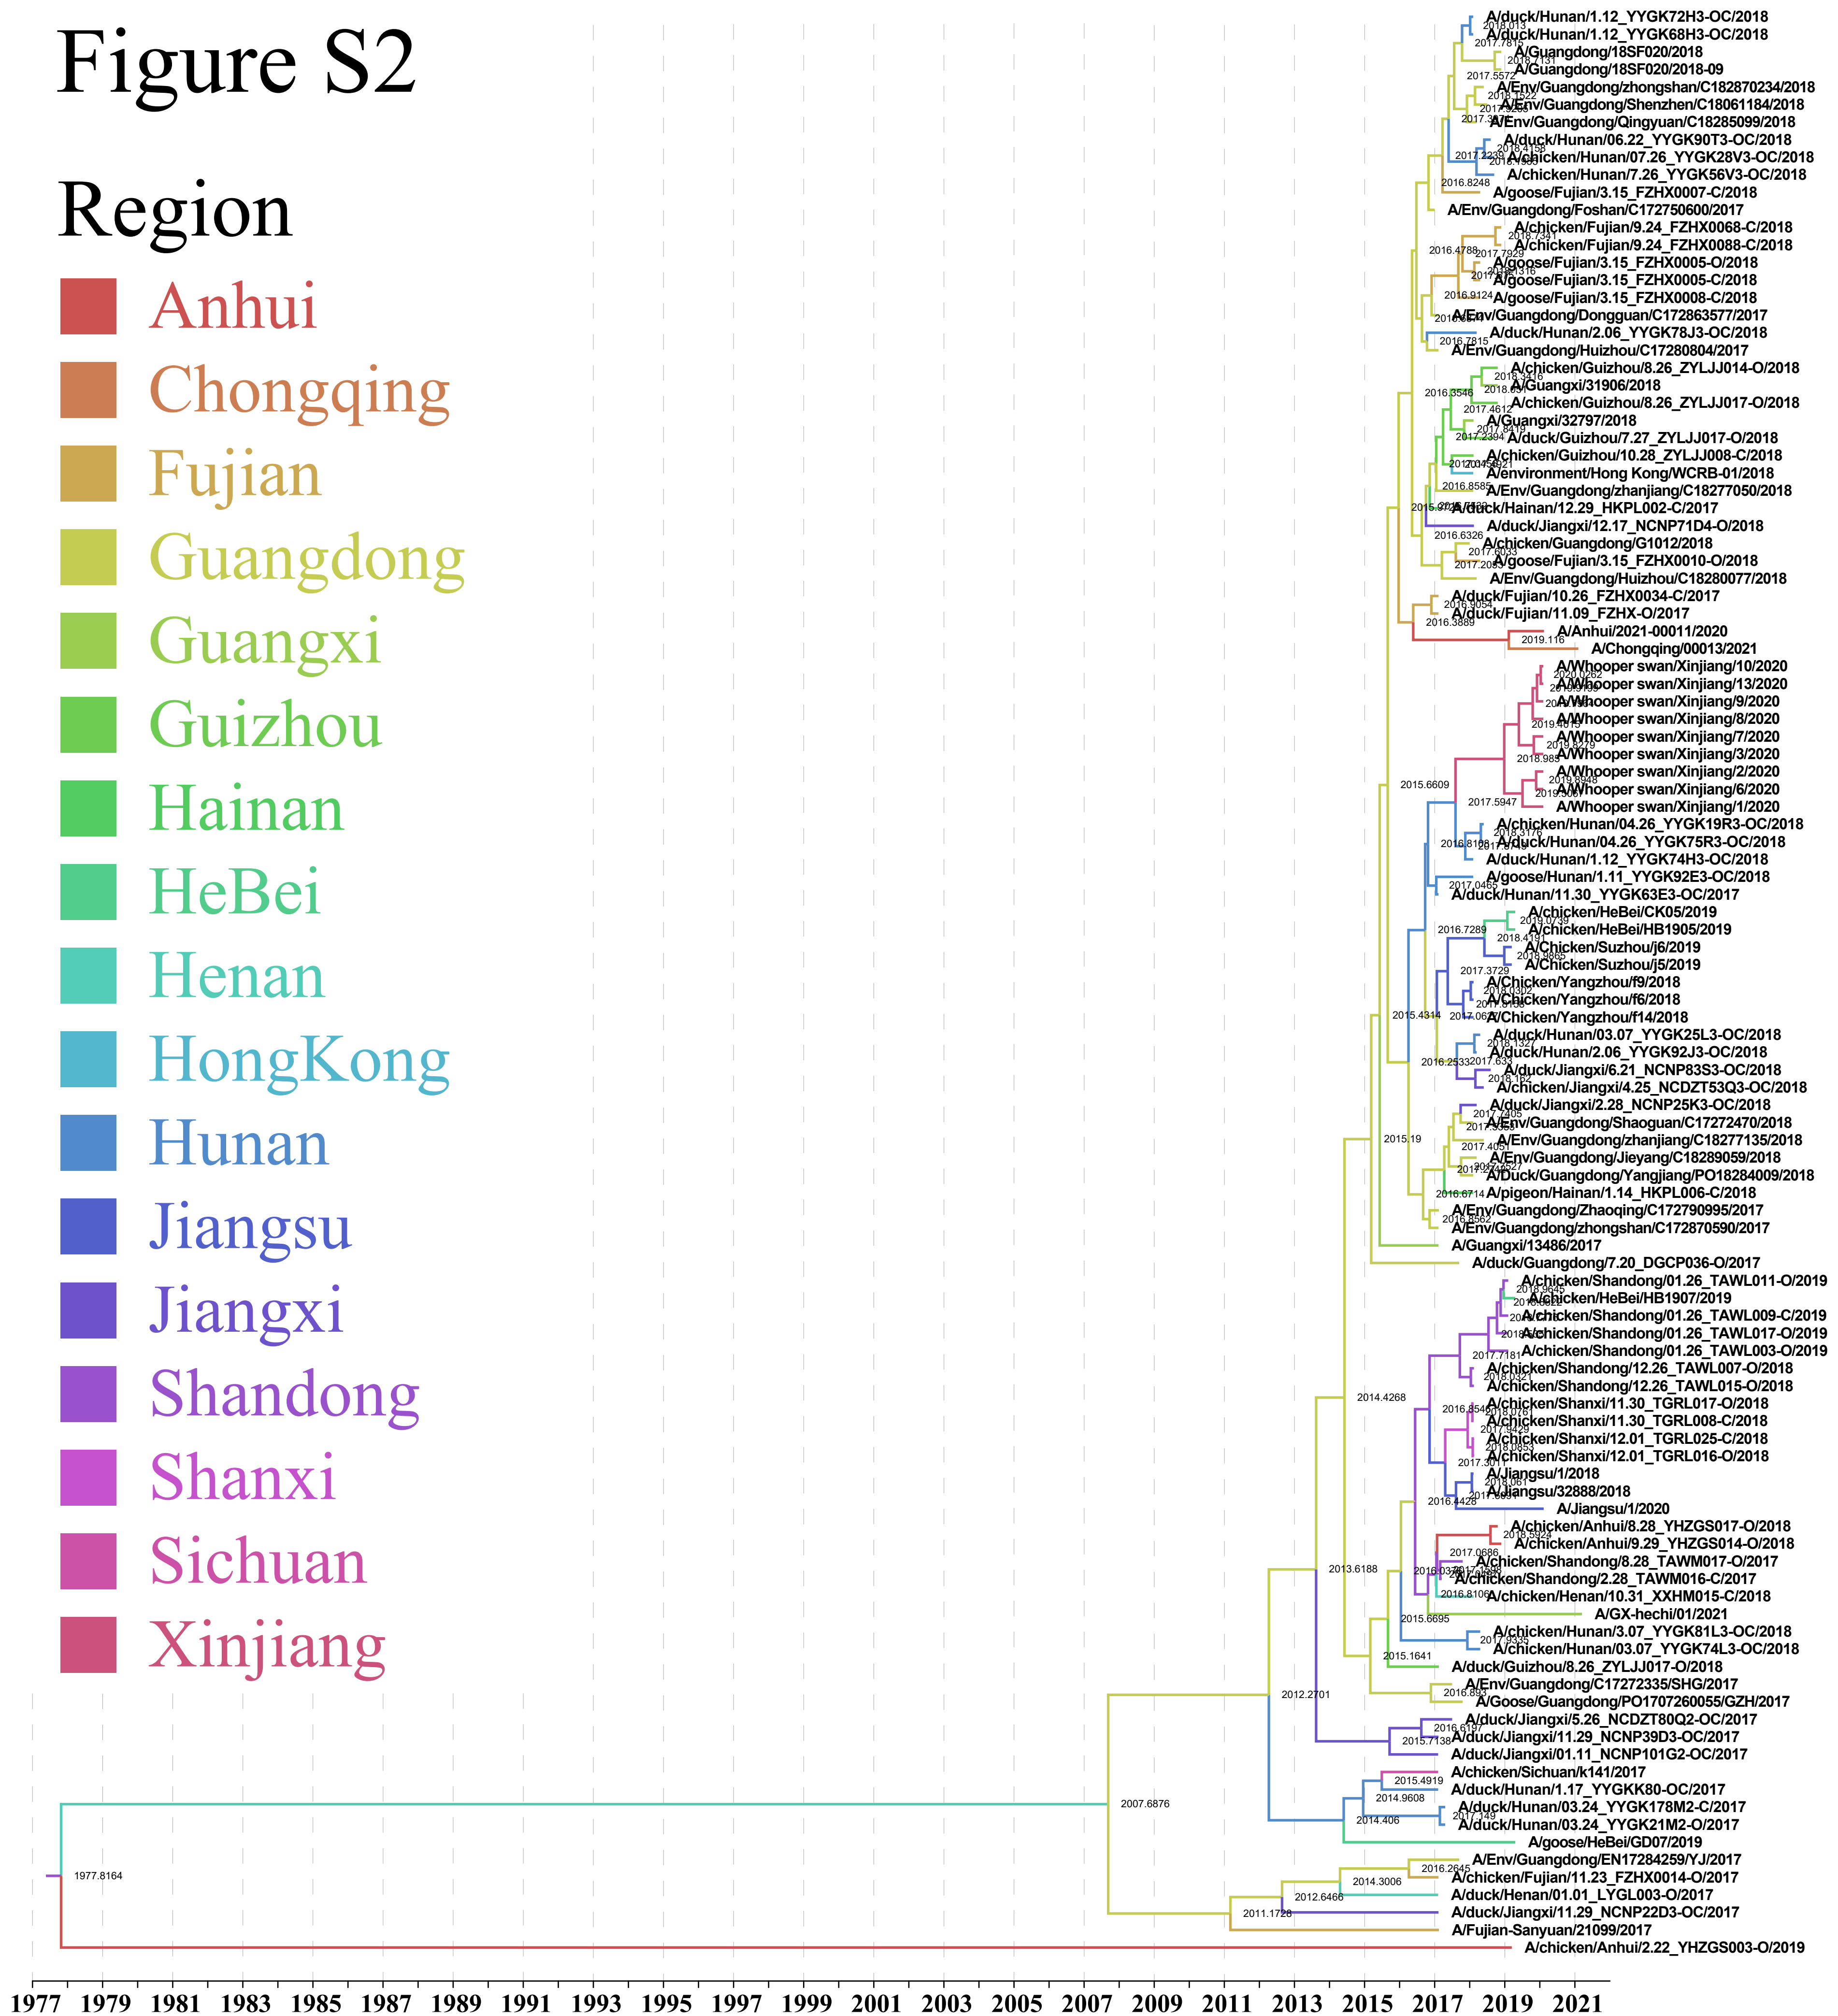

Supplement: s1 [file s1]

NS

Colored ranges

H5N1

H5N8

H3N2

H7N9/H9N2

Other subtypes

Tree scale: 0.01

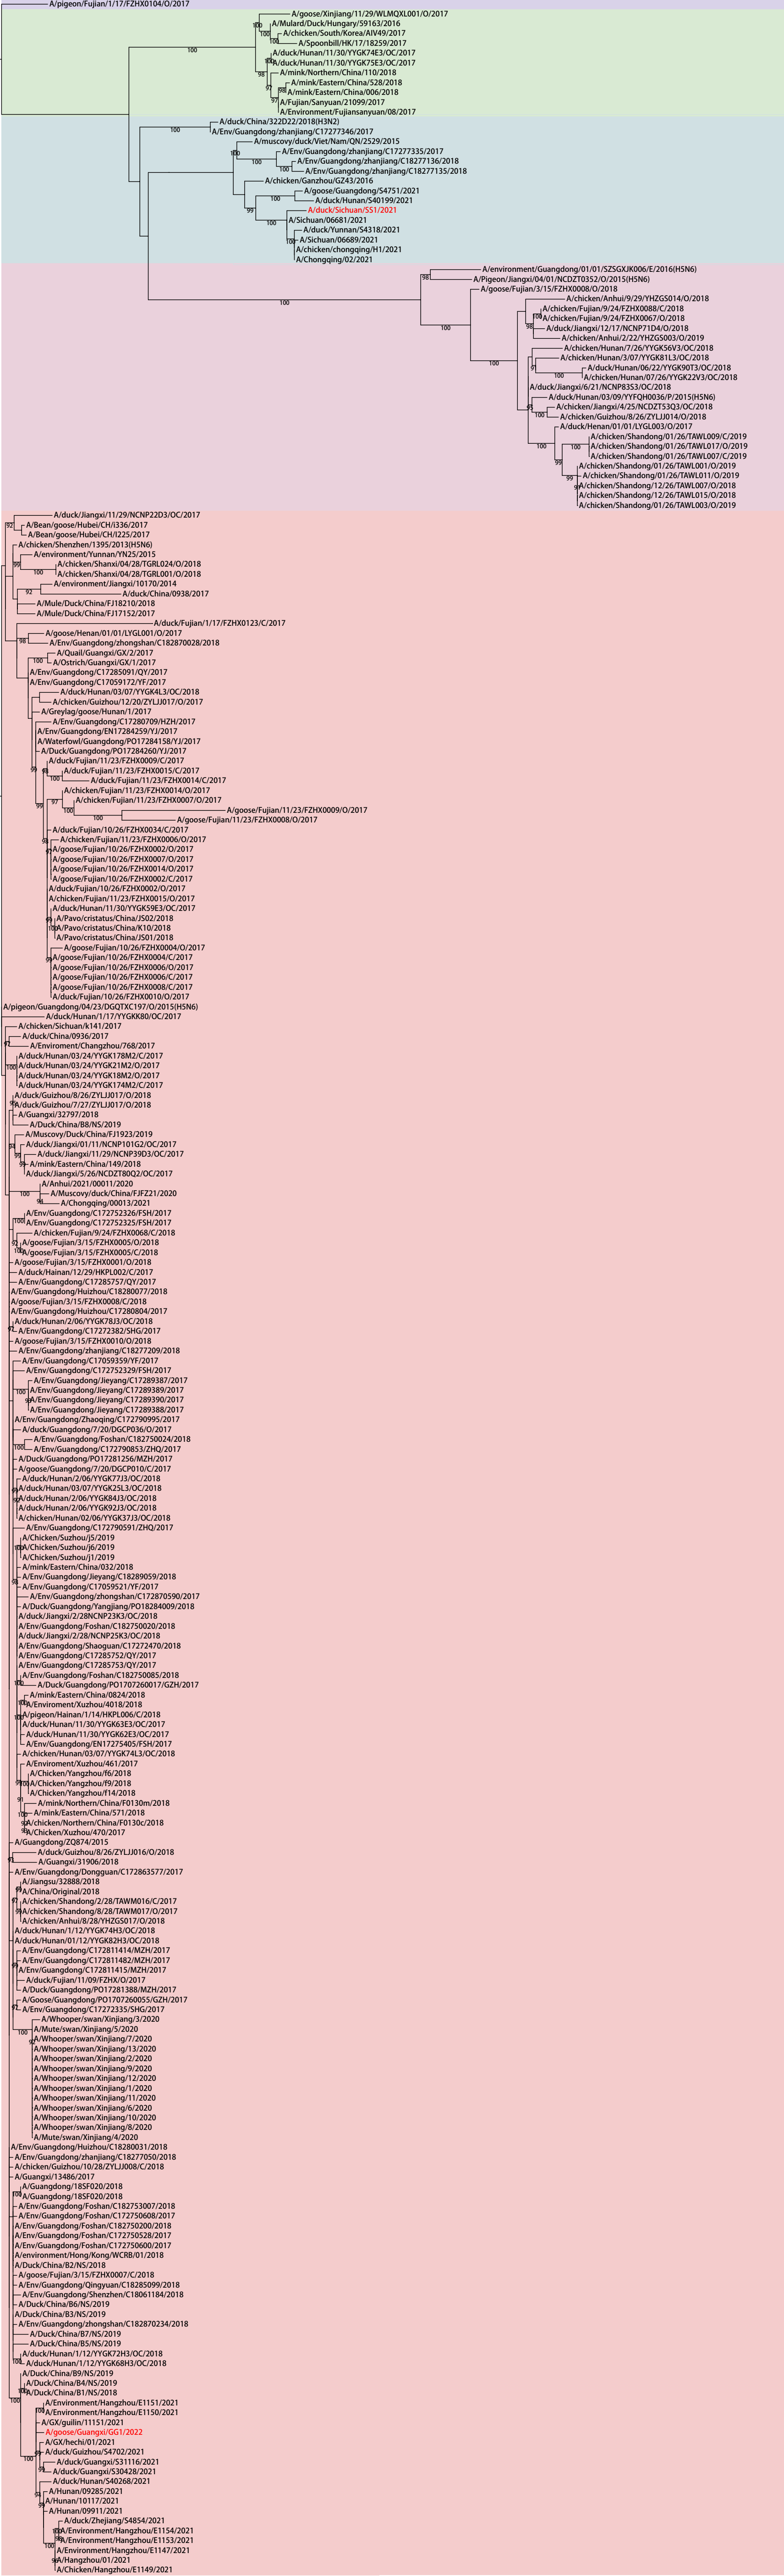

Supplement: s1 [file s1]

M

Colored ranges

- H3N2
- H7N9/H9N2
- H5N1
- H5N6
- H5N8

Tree scale: 0.01

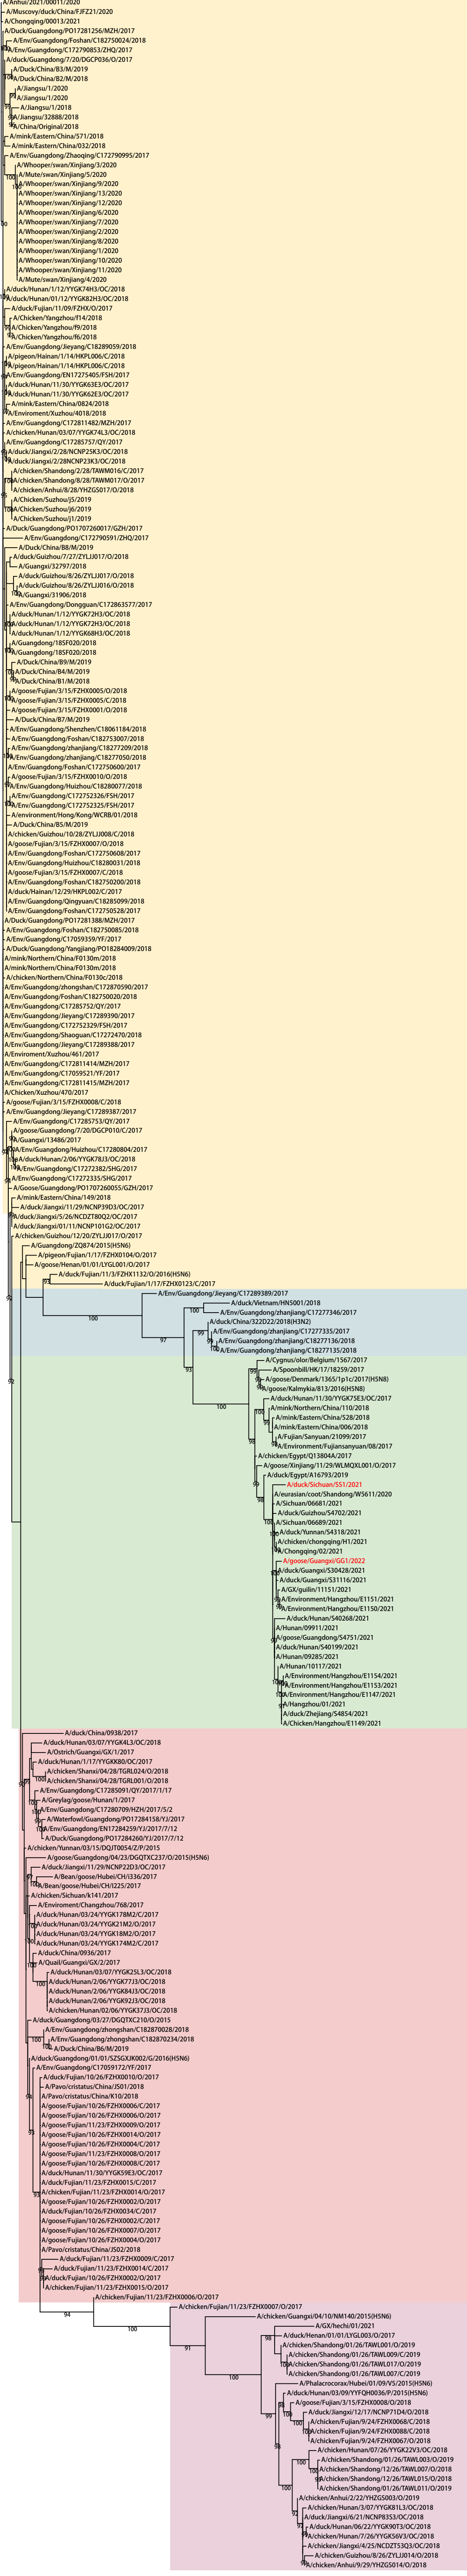

Supplement: s1 [file s1]

PA

Colored ranges

- H3N2
- H7N9/H9N2
- H5N6
- H5N8
- H5N1
- Other subtypes

Tree scale: 0.01

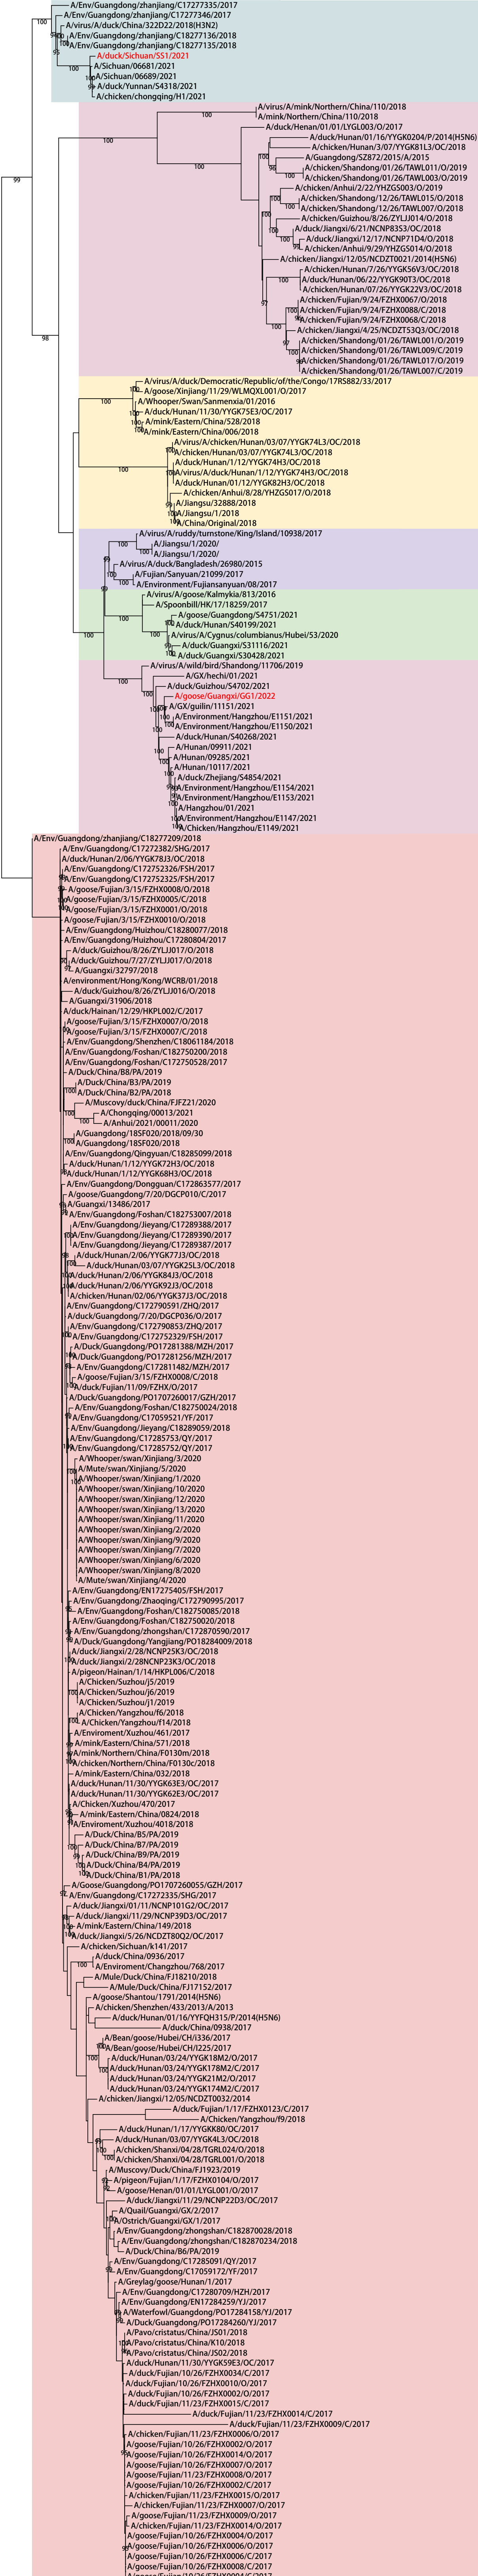

Supplement: s1 [file s1]

# HA

Clade

- 2.3.4.4c
- 2.3.4.4b
- 2.3.4.4g
- 2.3.4.4e
- 2.3.4.4h

Tree scale: 0.01

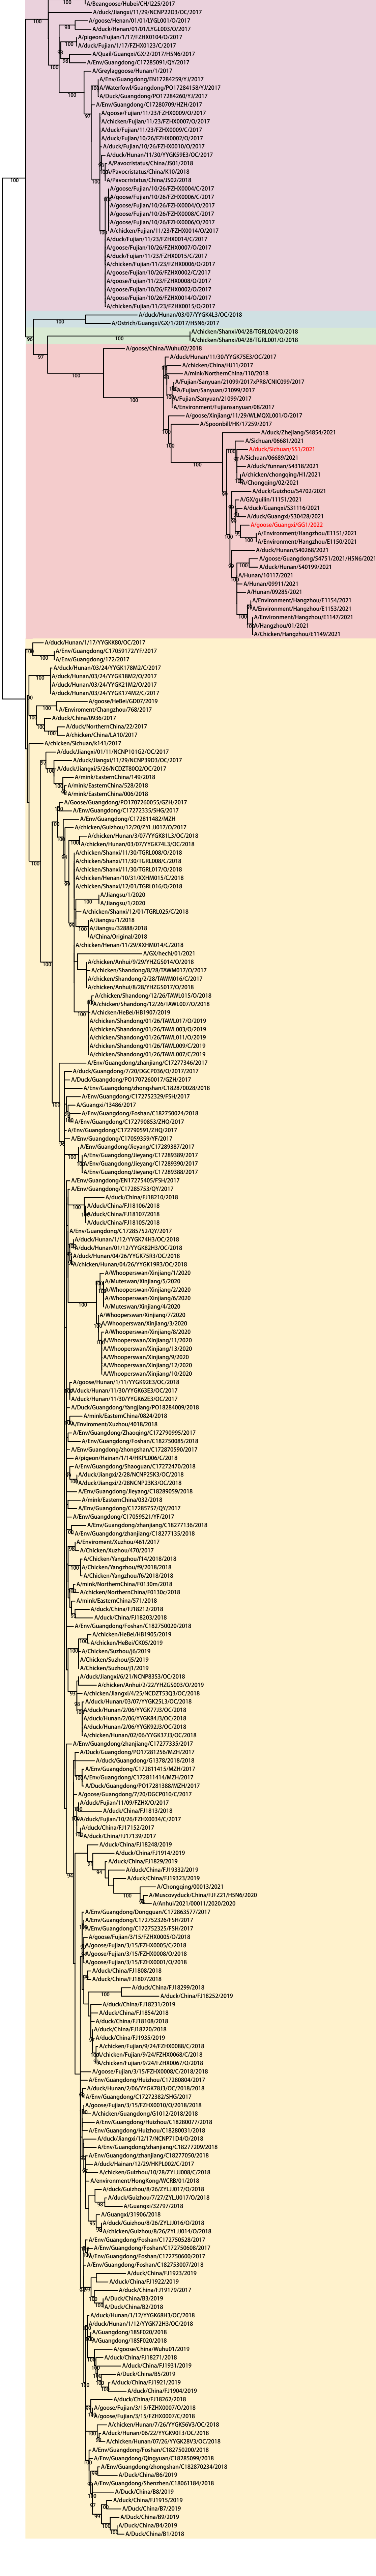

Supplement: s1 [file s1]

# Figure S1

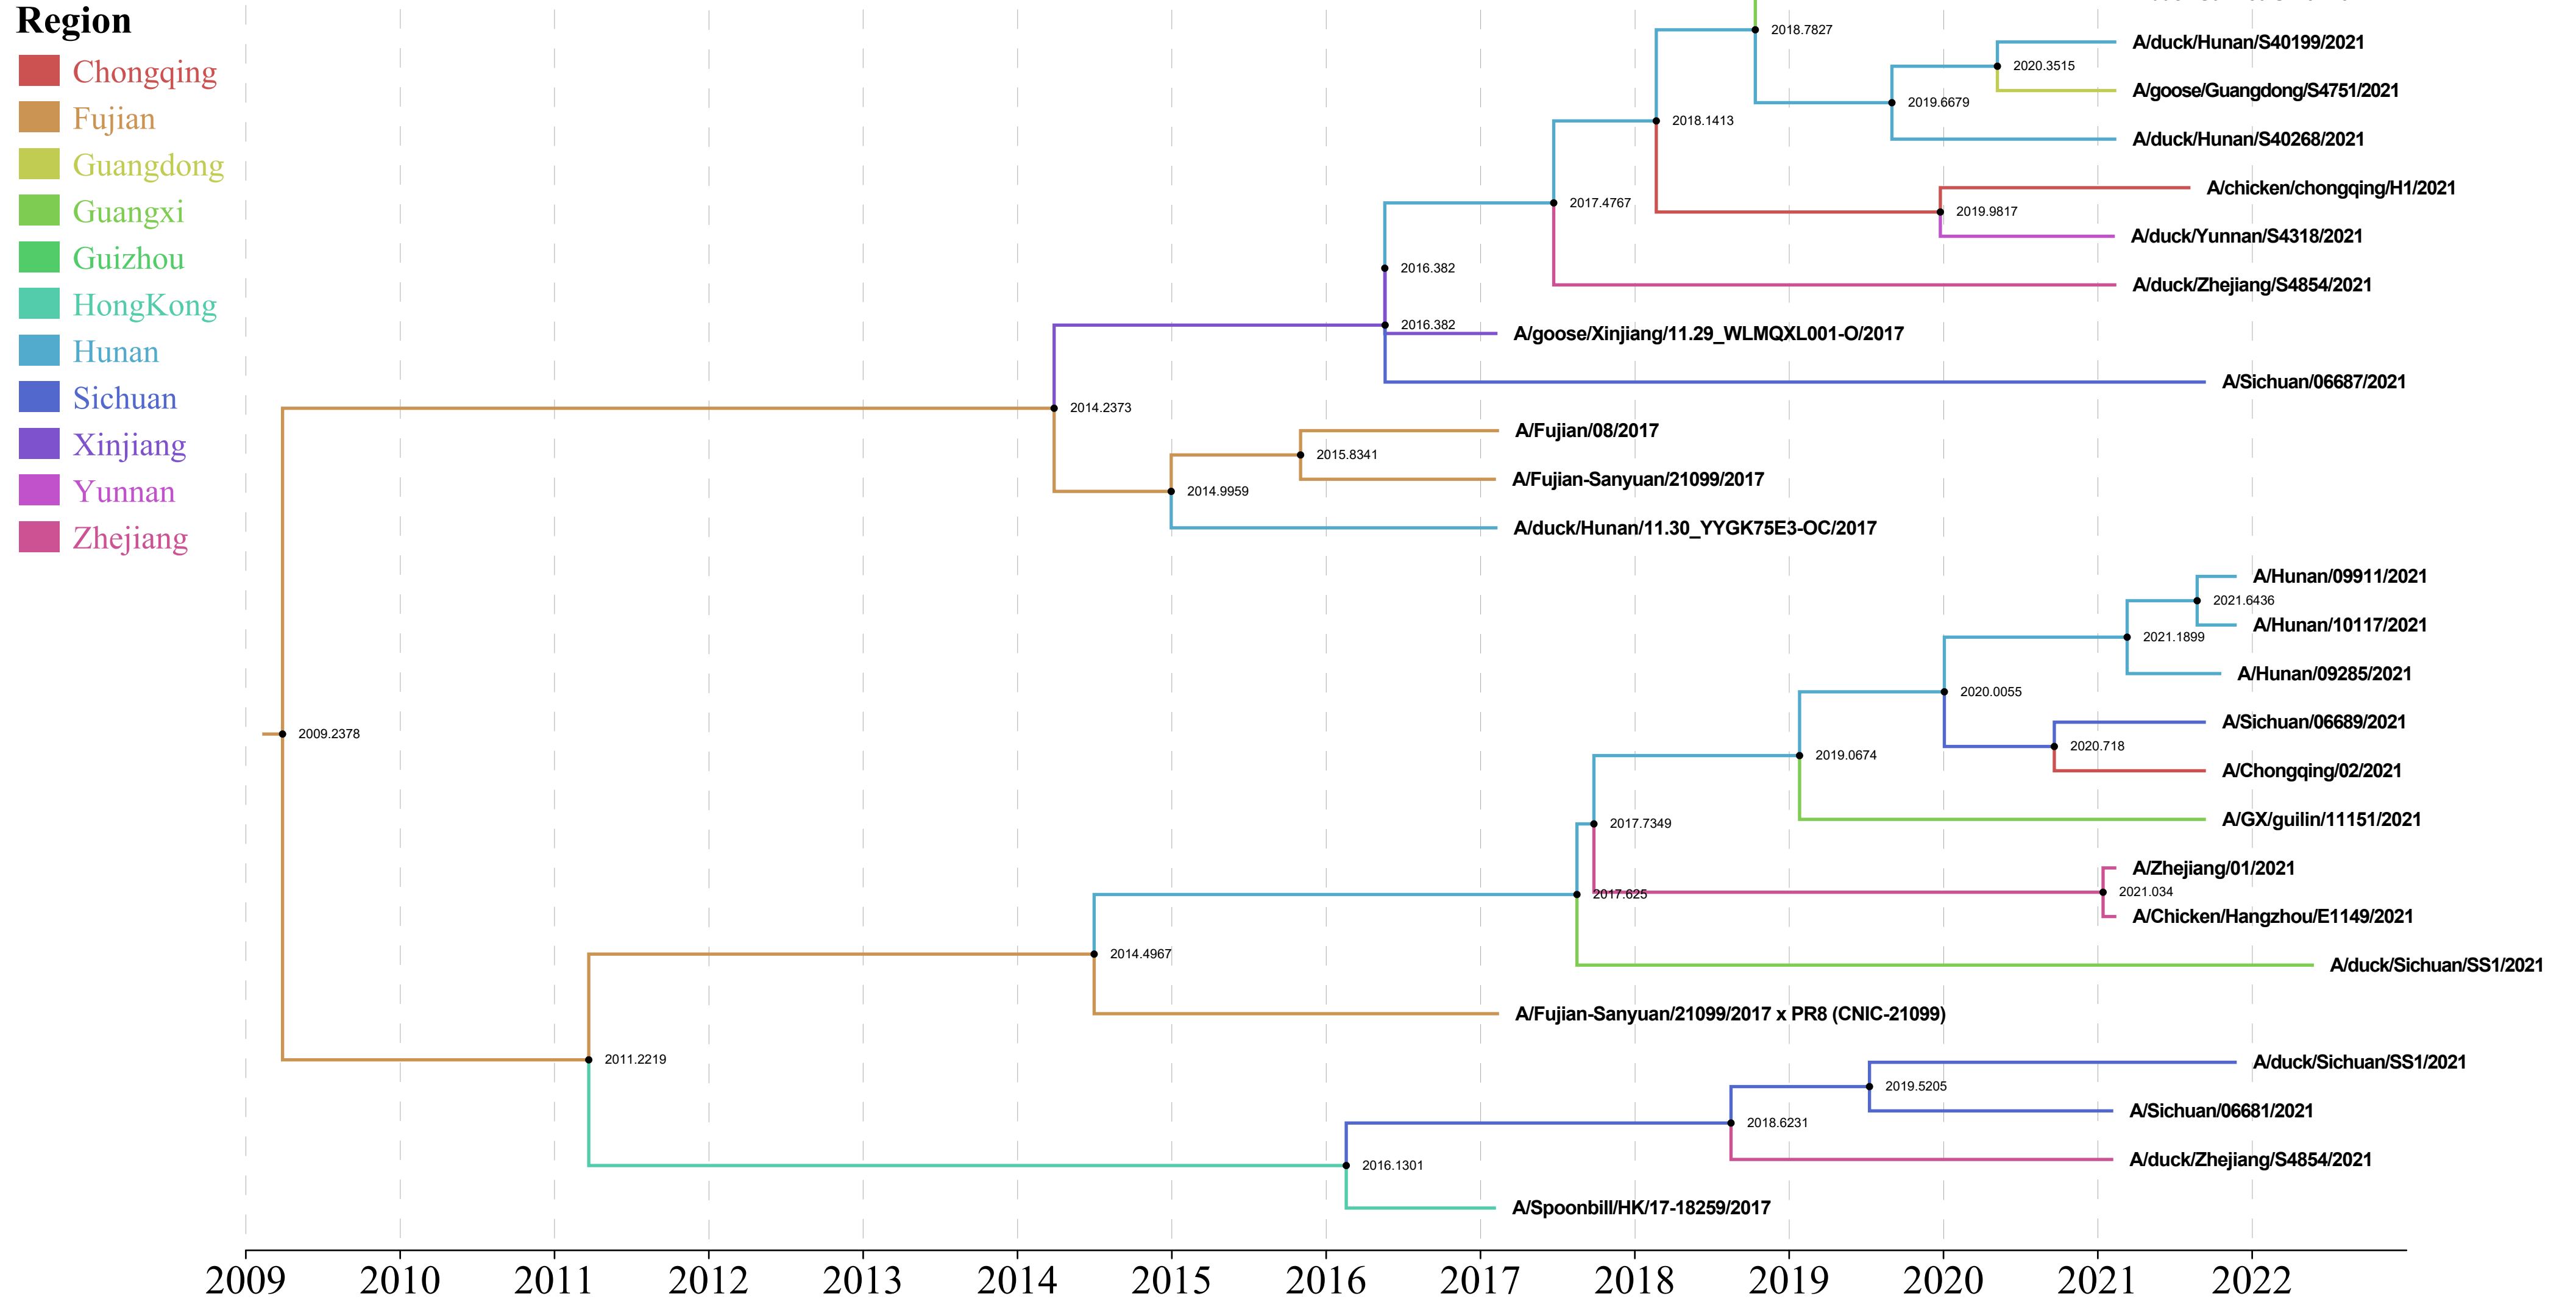

Supplement: s1 [file s1]

NA

Lineage

- North-American
- Europe
- Eurasian

Tree scale: 0.01

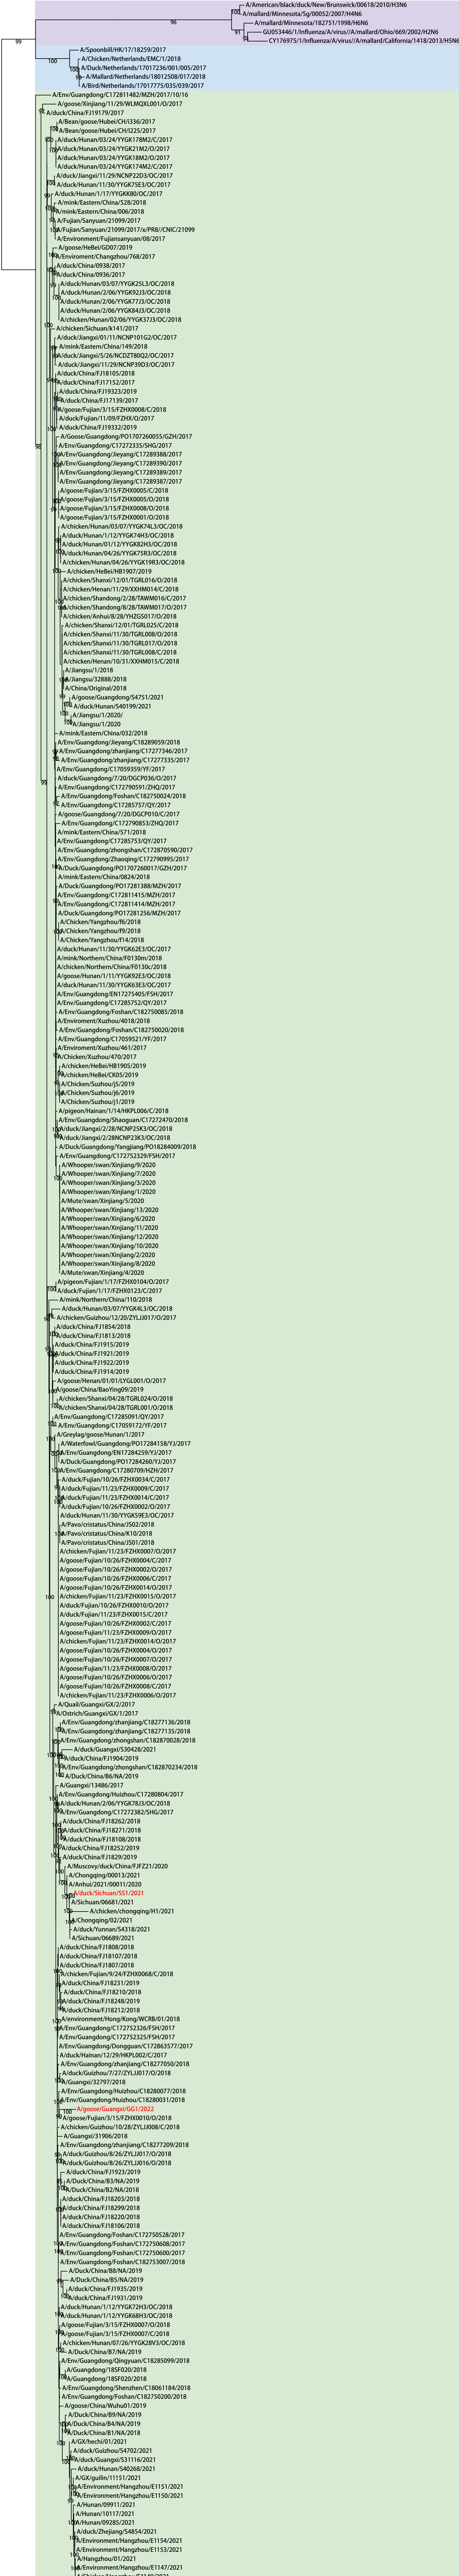

Supplement: s1 [file s1]

# PB2

## Colored ranges

-  H3N2
-  H5N8
-  H5N1
-  H7N9/H9N2
-  H6

Tree scale: 0.01

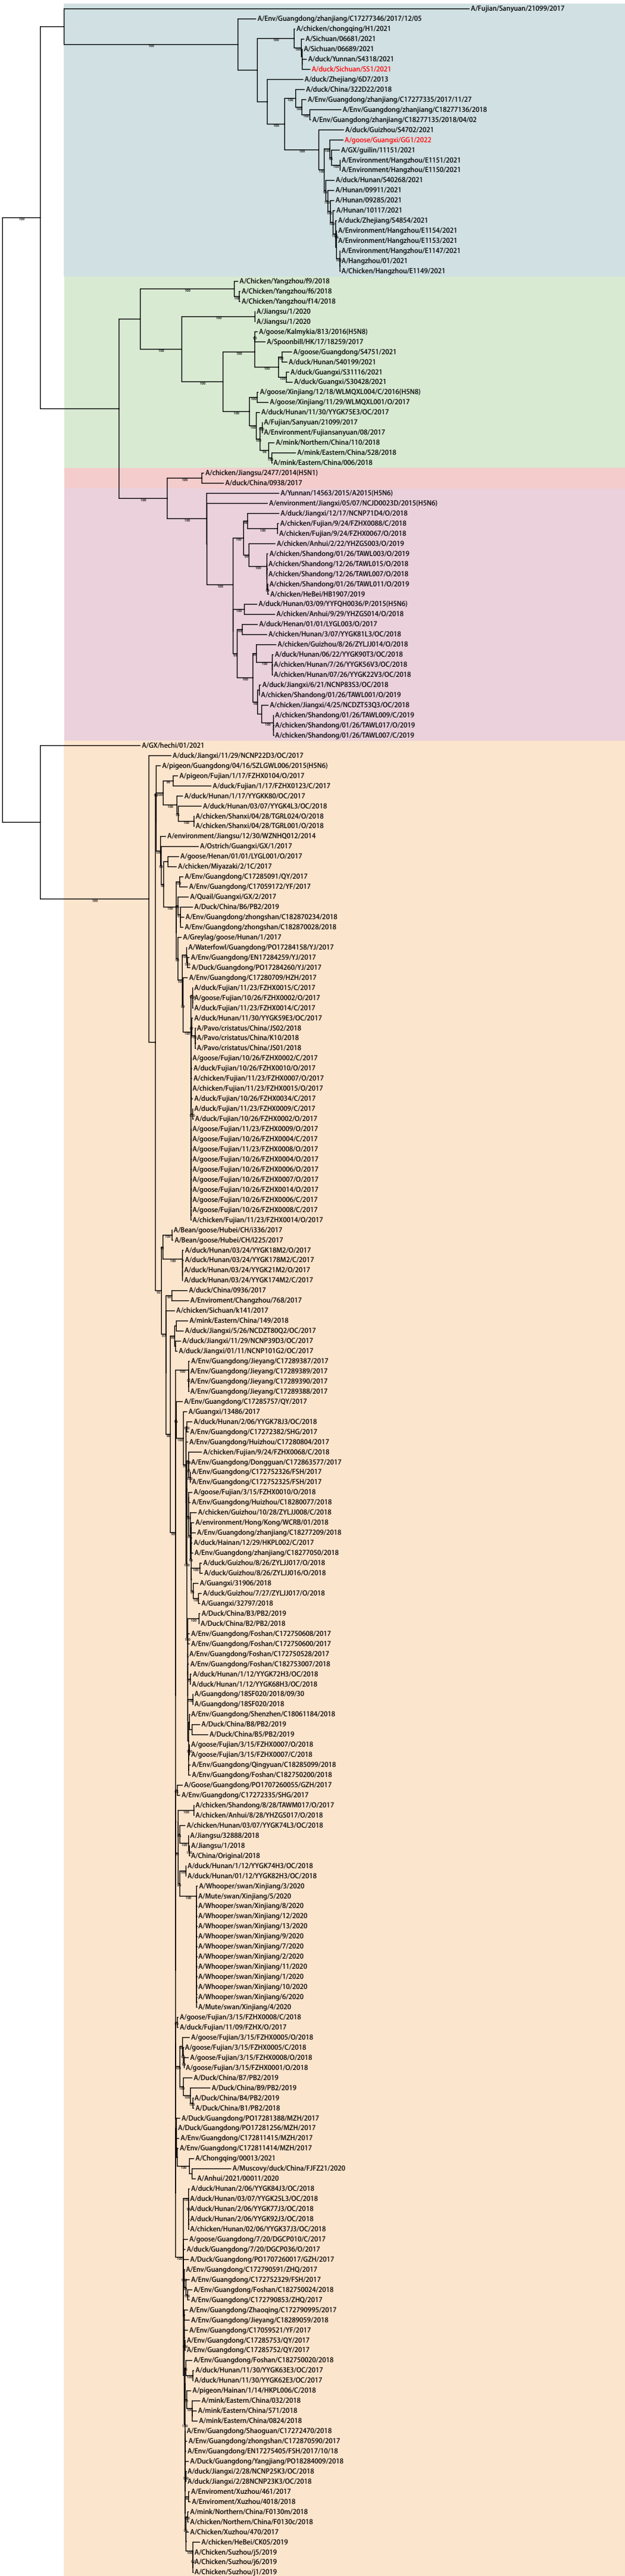

Supplement: s1 [file s1]

# PB1

## Colored ranges

- H7N9/H9N2
- H5N8
- H5N6
- H5N1
- H3N2

Tree scale: 0.01

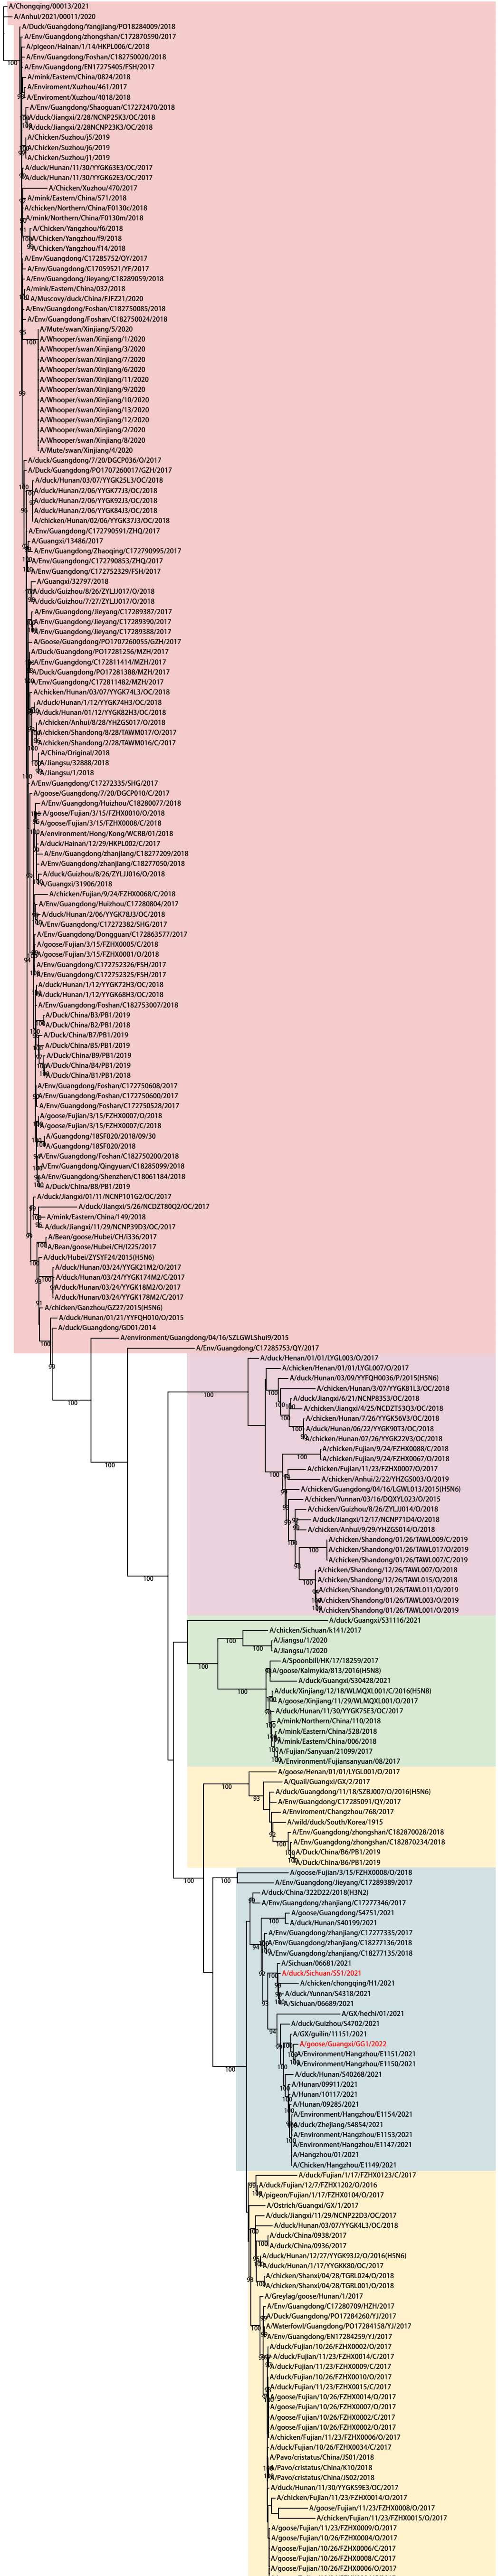

Supplement: s1 [file s1]
